# Supplementary material for: Association of Hemoglobin A1c Levels With Use of Sulfonylureas, Dipeptidyl Peptidase 4 Inhibitors, and Thiazolidinediones in Patients With Type 2 Diabetes Treated With Metformin: Analysis From the Observational Health Data Sciences and Informatics Initiative
Source: PubMed Central journal article supplement (PMC6324274; doi:10.1001/jamanetworkopen.2018.1755), 2018-08-24
Supplement: jamanetwopen-1-e181755-s001.pdf [file jamanetwopen-1-e181755-s001.pdf]

## Supplementary Online Content

Vashisht R, Jung K, Schuler A, et al. Association of hemoglobin A<sub>1c</sub> levels with use of sulfonylureas, dipeptidyl peptidase 4 inhibitors, and thiazolidinediones in patients with type 2 diabetes treated with metformin: analysis from the Observational Health Data Sciences and Informatics Initiative. *JAMA Netw Open*. 2018;1(4):e181755. doi:10.1001/jamanetworkopen.2018.1755

### **eAppendix.** OMOP Common Data Model

**eTable 1.** Concept IDs Utilized for Outcome MI, KD, ED and KD

**eTable 2.** Concepts Used as Negative Controls for *P* Value Calibration

**eTable 3.** Number of Patients Before and After Matching for Each Drug Comparison and Outcome HbA<sub>1c</sub>

**eTable 4.** Number of Patients Before and After Matching for Each Drug Comparison and Outcome Myocardial Infarction

**eTable 5.** Number of Patients Before and After Matching for Each Drug Comparison and Outcome Kidney Disorders

**eTable 6.** Number of Patients Before and After Matching for Each Drug Comparison and Outcome Eye Disorders

**eTable 7.** Age Information Before and After Matching for Each Drug Comparison Based on the Data From Truven MarketScan CCAE

**eTable 8.** Age Information Before and After Matching for Each Drug Comparison Based on the Data From Columbia University

**eTable 9.** Age Information Before and After Matching for Each Drug Comparison Based on the Data From IQVIA Disease Analyzer France

**eTable 10.** Age Information Before and After Matching for Each Drug Comparison Based on the Data From Truven MarketScan MDCR

**eTable 11.** Age Information Before and After Matching for Each Drug Comparison Based on the Data From Mount Sinai

**eTable 12.** Age Information Before and After Matching for Each Drug Comparison Based on the Data From Optum Clinformatics Data Mart

**eTable 13.** Age Information Before and After Matching for Each Drug Comparison Based on the Data From Ajou University, South Korea

**eTable 14.** Age Information Before and After Matching for Each Drug Comparison Based on the Data From Stanford University

**eTable 15.** Mean, Median and Standard Deviation of HbA<sub>1c</sub> Values for the Comparison of Sulfonylureas vs DPP4 Inhibitors Across Eight Study Sites

**eTable 16.** Mean, Median and Standard Deviation of HbA<sub>1c</sub> Values for the Comparison of Sulfonylureas vs Thiazolidinediones Across Eight Study Sites

**eTable 17.** Mean, Median and Standard Deviation of HbA<sub>1c</sub> Values for the Comparison of DPP4 Inhibitors vs Thiazolidinediones Across Eight Study Sites

**eTable 18.** Number of Patients, Hazard Ratio, Confidence Intervals (CI), *P* Values and Calibrated *P* Values for Each Drug Comparison and Each Outcome Based on Analysis Across All Eight Study Sites

**eFigure 1.** Cohort Construction

**eFigure 2.** Comparative Effectiveness of Sulfonylureas vs Thiazolidinediones

**eFigure 3.** Comparative Effectiveness of DPP-4 Inhibitors vs Thiazolidinediones

This supplementary material has been provided by the authors to give readers additional information about their work.

## **eAppendix 1. OMOP Common Data Model**

The OMOP Common Data Model (CDM) allows for the systematic analysis of disparate observational databases. The core idea is to transform data contained within different databases into a common format (data model) as well as a common representation (terminologies, vocabularies, coding schemes), and then perform systematic analyses using a library of standard analytic routines based on the common format. CDM is designed to store observational data to allow for research, under the following principles:

- **Suitability for purpose:** The CDM aims at providing data organized in a way optimal for analysis, rather than for the purpose of operational needs of health care providers or payers.
- **Data protection:** All data that might jeopardize the identity and protection of patients, such as names, precise birthdays etc. are limited. Exceptions are possible where the research expressly requires more detailed information, such as precise birth dates for the study of infants.
- **Design of domains:** The domains are modeled in a person-centric relational data model, where for each record the identity of the person and a date is captured as a minimum.
- **Rationale for domains:** Domains are identified and separately defined in an Entity-relationship model if they have an analysis use case and the domain has specific attributes that are not otherwise applicable. All other data can be preserved as an observation in an entity-attribute-value structure.
- **Standardized Vocabularies:** To standardize the content of those records, the CDM relies on the Standardized Vocabularies containing all necessary and appropriate corresponding standard healthcare concepts.
- **Reuse of existing vocabularies:** If possible, these concepts are leveraged from national or industry standardization or vocabulary definition organizations or initiatives, such as the National Library of Medicine, the Department of Veterans' Affairs, the Center of Disease Control and Prevention, etc.
- **Maintaining source codes:** Even though all codes are mapped to the Standardized Vocabularies, the model also stores the original source code to ensure no information is lost.
- **Technology neutrality:** The CDM does not require a specific technology. It can be realized in any relational database, such as Oracle, SQL Server etc., or as SAS analytical datasets.
- **Scalability:** The CDM is optimized for data processing and computational analysis to accommodate data sources that vary in size, including databases with up to hundreds of millions of persons and billions of clinical observations.
- **Backwards compatibility:** All changes from previous CDMs are clearly delineated. Older versions of the CDM can be easily created from this CDMv5, and no information is lost that was present previously.

Detailed discussion related to the above mentioned design principles of OMOP-CDM data model can be explored in detail at <https://github.com/OHDSI/CommonDataModel/wiki>

**eTable 1.** Concept IDs Utilized for Outcome MI, KD, ED and KD

| <b>Comparison: Sulfonylureas vs DPP4 inhibitors – Outcome: Myocardial Infarction</b> |                               |                                                                      |                           |
|--------------------------------------------------------------------------------------|-------------------------------|----------------------------------------------------------------------|---------------------------|
| <b>Drug</b>                                                                          | <b>Concept Identifier</b>     | <b>Concept Name</b>                                                  | <b>Number of Patients</b> |
| <b>Sulfonylureas</b>                                                                 | 312327                        | Acute myocardial infarction                                          | 3                         |
|                                                                                      | 438170                        | Acute myocardial infarction of inferior wall                         | 1                         |
| <b>DPP4 inhibitors</b>                                                               | 444406                        | Acute subendocardial infarction                                      | 2                         |
|                                                                                      | 312327                        | Acute myocardial infarction                                          | 1                         |
| <b>Comparison: Sulfonylureas vs DPP4 inhibitors – Outcome: Kidney Disorders</b>      |                               |                                                                      |                           |
| <b>Drug</b>                                                                          | <b>Concept Identifier</b>     | <b>Concept Name</b>                                                  | <b>Number of Patients</b> |
| <b>Sulfonylureas</b>                                                                 | 443731                        | Renal disorder due to type 2 diabetes mellitus                       | 14                        |
|                                                                                      | 192279                        | Diabetic renal disease                                               | 11                        |
|                                                                                      | 197320                        | Acute renal failure syndrome                                         | 9                         |
|                                                                                      | 201620                        | Kidney stone                                                         | 4                         |
|                                                                                      | 198185                        | Chronic renal failure                                                | 3                         |
|                                                                                      | 439697                        | Hypertensive renal disease with renal failure                        | 3                         |
|                                                                                      | 443597                        | Chronic kidney disease stage 3                                       | 3                         |
|                                                                                      | 198199                        | Pyelonephritis                                                       | 2                         |
|                                                                                      | 439696                        | Hypertensive heart and renal disease with (congestive) heart failure | 2                         |
|                                                                                      | 443601                        | Chronic kidney disease stage 2                                       | 2                         |
|                                                                                      | 193016                        | Cystic disease of kidney                                             | 1                         |
|                                                                                      | 193253                        | Nephritis                                                            | 1                         |
|                                                                                      | 194152                        | Renal agenesis and dysgenesis                                        | 1                         |
|                                                                                      | 194686                        | Acquired renal cystic disease                                        | 1                         |
|                                                                                      | 198985                        | Primary malignant neoplasm of kidney                                 | 1                         |
| 433811                                                                               | Hydronephrosis                | 1                                                                    |                           |
| <b>DPP4 inhibitors</b>                                                               | 197320                        | Acute renal failure syndrome                                         | 6                         |
|                                                                                      | 192279                        | Diabetic renal disease                                               | 2                         |
|                                                                                      | 193016                        | Cystic disease of kidney                                             | 2                         |
|                                                                                      | 201620                        | Kidney stone                                                         | 2                         |
|                                                                                      | 443731                        | Renal disorder due to type 2 diabetes mellitus                       | 2                         |
|                                                                                      | 444044                        | Acute tubular necrosis                                               | 2                         |
|                                                                                      | 192359                        | Renal failure syndrome                                               | 1                         |
|                                                                                      | 193253                        | Nephritis                                                            | 1                         |
| 194686                                                                               | Acquired renal cystic disease | 1                                                                    |                           |

|                                                                                         |                           |                                                |                           |
|-----------------------------------------------------------------------------------------|---------------------------|------------------------------------------------|---------------------------|
|                                                                                         | 198185                    | Chronic renal failure                          | 1                         |
|                                                                                         | 433811                    | Hydronephrosis                                 | 1                         |
|                                                                                         | 439697                    | Hypertensive renal disease with renal failure  | 1                         |
|                                                                                         | 443597                    | Chronic kidney disease stage 3                 | 1                         |
| <b>Comparison: Sulfonylureas vs DPP4 inhibitors – Outcome: Eye Disorders</b>            |                           |                                                |                           |
| <b>Drug</b>                                                                             | <b>Concept Identifier</b> | <b>Concept Name</b>                            | <b>Number of Patients</b> |
| <b>Sulfonylureas</b>                                                                    | 439297                    | Nuclear senile cataract                        | 10                        |
|                                                                                         | 376683                    | Nonproliferative diabetic retinopathy          | 4                         |
|                                                                                         | 4102183                   | Borderline glaucoma                            | 2                         |
|                                                                                         | 375545                    | Cataract                                       | 1                         |
|                                                                                         | 377552                    | Moderate nonproliferative diabetic retinopathy | 1                         |
|                                                                                         | 378743                    | Mild non-proliferative diabetic retinopathy    | 1                         |
|                                                                                         | 432311                    | Angle-closure glaucoma - borderline            | 1                         |
|                                                                                         | 435810                    | Capsular fibrosis                              | 1                         |
|                                                                                         | 437541                    | Glaucoma                                       | 1                         |
| <b>DPP4 inhibitors</b>                                                                  | 439297                    | Nuclear senile cataract                        | 6                         |
|                                                                                         | 381295                    | Age-related cataract                           | 2                         |
|                                                                                         | 372894                    | Central serous chorioretinopathy               | 1                         |
|                                                                                         | 375545                    | Cataract                                       | 1                         |
|                                                                                         | 376683                    | Nonproliferative diabetic retinopathy          | 1                         |
|                                                                                         | 435262                    | Primary open angle glaucoma                    | 1                         |
|                                                                                         | 4102183                   | Borderline glaucoma                            | 1                         |
| <b>Comparison: Sulfonylureas vs Thiazolidinediones – Outcome: Myocardial Infarction</b> |                           |                                                |                           |
| <b>Drug</b>                                                                             | <b>Concept Identifier</b> | <b>Concept Name</b>                            | <b>Number of Patients</b> |
| <b>Sulfonylureas</b>                                                                    | 438170                    | Acute myocardial infarction of inferior wall   | 1                         |
| <b>Thiazolidinediones</b>                                                               | 444406                    | Acute subendocardial infarction                | 2                         |
| <b>Comparison: Sulfonylureas vs Thiazolidinediones – Outcome: Kidney disorders</b>      |                           |                                                |                           |
| <b>Drug</b>                                                                             | <b>Concept Identifier</b> | <b>Concept Name</b>                            | <b>Number of Patients</b> |
| <b>Sulfonylureas</b>                                                                    | 443731                    | Renal disorder due to type 2 diabetes mellitus | 9                         |
|                                                                                         | 197320                    | Acute renal failure syndrome                   | 8                         |
|                                                                                         | 192279                    | Diabetic renal disease                         | 7                         |
|                                                                                         | 443597                    | Chronic kidney disease stage 3                 | 6                         |
|                                                                                         | 439697                    | Hypertensive renal disease with renal failure  | 5                         |
|                                                                                         | 198185                    | Chronic renal failure                          | 3                         |

|                                                                                |                           |                                                 |                           |
|--------------------------------------------------------------------------------|---------------------------|-------------------------------------------------|---------------------------|
|                                                                                | 193253                    | Nephritis                                       | 2                         |
|                                                                                | 201620                    | Kidney stone                                    | 2                         |
|                                                                                | 443614                    | Chronic kidney disease stage 1                  | 2                         |
|                                                                                | 195314                    | Nephrotic syndrome                              | 1                         |
|                                                                                | 198199                    | Pyelonephritis                                  | 1                         |
|                                                                                | 433811                    | Hydronephrosis                                  | 1                         |
|                                                                                | 444044                    | Acute tubular necrosis                          | 1                         |
| <b>Thiazolidinediones</b>                                                      | 192279                    | Diabetic renal disease                          | 5                         |
|                                                                                | 443731                    | Renal disorder due to type 2 diabetes mellitus  | 5                         |
|                                                                                | 197320                    | Acute renal failure syndrome                    | 4                         |
|                                                                                | 201620                    | Kidney stone                                    | 2                         |
|                                                                                | 439697                    | Hypertensive renal disease with renal failure   | 2                         |
|                                                                                | 443597                    | Chronic kidney disease stage 3                  | 2                         |
|                                                                                | 443601                    | Chronic kidney disease stage 2                  | 2                         |
|                                                                                | 193016                    | Cystic disease of kidney                        | 1                         |
|                                                                                | 193782                    | End stage renal disease                         | 1                         |
|                                                                                | 198185                    | Chronic renal failure                           | 1                         |
| <b>Comparison: Sulfonylureas vs Thiazolidinediones – Outcome: Eye disorder</b> |                           |                                                 |                           |
| <b>Drug</b>                                                                    | <b>Concept Identifier</b> | <b>Concept Name</b>                             | <b>Number of Patients</b> |
| <b>Sulfonylureas</b>                                                           | 439297                    | Nuclear senile cataract                         | 10                        |
|                                                                                | 375545                    | Cataract                                        | 4                         |
|                                                                                | 380097                    | Diabetic macular edema                          | 2                         |
|                                                                                | 435262                    | Primary open angle glaucoma                     | 2                         |
|                                                                                | 437541                    | Glaucoma                                        | 2                         |
|                                                                                | 376114                    | Severe nonproliferative diabetic retinopathy    | 1                         |
|                                                                                | 376683                    | Nonproliferative diabetic retinopathy           | 1                         |
|                                                                                | 376965                    | Hypertensive retinopathy                        | 1                         |
|                                                                                | 380096                    | Proliferative diabetic retinopathy              | 1                         |
|                                                                                | 432626                    | Glaucoma associated with vascular disorder      | 1                         |
|                                                                                | 4102183                   | Borderline glaucoma                             | 1                         |
| <b>Thiazolidinediones</b>                                                      | 439297                    | Nuclear senile cataract                         | 7                         |
|                                                                                | 375545                    | Cataract                                        | 3                         |
|                                                                                | 378743                    | Mild non-proliferative diabetic retinopathy     | 2                         |
|                                                                                | 437541                    | Glaucoma                                        | 2                         |
|                                                                                | 381295                    | Age-related cataract                            | 1                         |
|                                                                                | 435262                    | Primary open angle glaucoma                     | 1                         |
|                                                                                | 437851                    | Open angle with borderline intraocular pressure | 1                         |
|                                                                                | 4102183                   | Borderline glaucoma                             | 1                         |

| <b>Comparison: DPP4 inhibitors vs Thiazolidinediones – Outcome: Myocardial Infarction</b> |                                               |                                                |                           |
|-------------------------------------------------------------------------------------------|-----------------------------------------------|------------------------------------------------|---------------------------|
| <b>Drug</b>                                                                               | <b>Concept Identifier</b>                     | <b>Concept Name</b>                            | <b>Number of Patients</b> |
| <b>DPP4 inhibitors</b>                                                                    | 444406                                        | Acute subendocardial infarction                | 1                         |
| <b>Thiazolidinediones</b>                                                                 | NA                                            | NA                                             | NA                        |
| <b>Comparison: DPP4 inhibitors vs Thiazolidinediones – Outcome: Kidney disorders</b>      |                                               |                                                |                           |
| <b>Drug</b>                                                                               | <b>Concept Identifier</b>                     | <b>Concept Name</b>                            | <b>Number of Patients</b> |
| <b>DPP4 inhibitors</b>                                                                    | 197320                                        | Acute renal failure syndrome                   | 6                         |
|                                                                                           | 443731                                        | Renal disorder due to type 2 diabetes mellitus | 4                         |
|                                                                                           | 192279                                        | Diabetic renal disease                         | 3                         |
|                                                                                           | 194686                                        | Acquired renal cystic disease                  | 2                         |
|                                                                                           | 443597                                        | Chronic kidney disease stage 3                 | 2                         |
|                                                                                           | 444044                                        | Acute tubular necrosis                         | 2                         |
|                                                                                           | 192359                                        | Renal failure syndrome                         | 1                         |
|                                                                                           | 193016                                        | Cystic disease of kidney                       | 1                         |
|                                                                                           | 193253                                        | Nephritis                                      | 1                         |
|                                                                                           | 198185                                        | Chronic renal failure                          | 1                         |
|                                                                                           | 201620                                        | Kidney stone                                   | 1                         |
| 439697                                                                                    | Hypertensive renal disease with renal failure | 1                                              |                           |
| <b>Thiazolidinediones</b>                                                                 | 197320                                        | Acute renal failure syndrome                   | 5                         |
|                                                                                           | 192279                                        | Diabetic renal disease                         | 4                         |
|                                                                                           | 443731                                        | Renal disorder due to type 2 diabetes mellitus | 4                         |
|                                                                                           | 198185                                        | Chronic renal failure                          | 3                         |
|                                                                                           | 443601                                        | Chronic kidney disease stage 2                 | 3                         |
|                                                                                           | 193016                                        | Cystic disease of kidney                       | 1                         |
|                                                                                           | 201620                                        | Kidney stone                                   | 1                         |
|                                                                                           | 439697                                        | Hypertensive renal disease with renal failure  | 1                         |
|                                                                                           | 443597                                        | Chronic kidney disease stage 3                 | 1                         |
| 443961                                                                                    | Anemia of chronic renal failure               | 1                                              |                           |
| <b>Comparison: DPP4 inhibitors vs Thiazolidinediones – Outcome: Eye disorders</b>         |                                               |                                                |                           |
| <b>Drug</b>                                                                               | <b>Concept Identifier</b>                     | <b>Concept Name</b>                            | <b>Number of Patients</b> |
| <b>DPP4 inhibitors</b>                                                                    | 439297                                        | Nuclear senile cataract                        | 2                         |
|                                                                                           | 376683                                        | Nonproliferative diabetic retinopathy          | 1                         |
|                                                                                           | 381295                                        | Age-related cataract                           | 1                         |
|                                                                                           | 437541                                        | Glaucoma                                       | 1                         |
|                                                                                           | 4102183                                       | Borderline glaucoma                            | 1                         |



|                           |         |                                                 |   |
|---------------------------|---------|-------------------------------------------------|---|
| <b>Thiazolidinediones</b> | 439297  | Nuclear senile cataract                         | 6 |
|                           | 375545  | Cataract                                        | 3 |
|                           | 437541  | Glaucoma                                        | 3 |
|                           | 378743  | Mild non-proliferative diabetic retinopathy     | 1 |
|                           | 381295  | Age-related cataract                            | 1 |
|                           | 437851  | Open angle with borderline intraocular pressure | 1 |
|                           | 4102183 | Borderline glaucoma                             | 1 |

SNOMED codes for secondary outcomes were obtained by searching for terms in the CDM’s vocabulary tables. To build the set of SNOMED codes “eye-related disorders” and “kidney related disorders”, we started with a keyword based search of SNOMED labels, and included the matching concepts as well as their subclasses in the OHDSI Standard Vocabulary (<https://github.com/OHDSI/CommonDataModel/wiki/Standardized-Vocabularies>).

This process generates a seemingly large list of concepts that correspond to the outcome of interest. In practice, not all the child codes are instantiated in the data. We show the frequency at which specific codes were actually seen in the cohorts analyzed at Stanford to illustrate which codes are actually instantiated in the data. Concepts utilized for identifying patients with myocardial Infarction, kidney disorders and eye disorders are shown in the table below. Each concept is ordered based on the total number of patients identified by the concept.

**eTable 2.** Concepts Used As Negative Controls for *P* Value Calibration

| <b>Concept Identifier</b> | <b>Concept Name</b>                       |
|---------------------------|-------------------------------------------|
| 376707                    | Acute conjunctivitis                      |
| 433753                    | Alcohol abuse                             |
| 257007                    | Allergic rhinitis                         |
| 442077                    | Anxiety disorder                          |
| 436665                    | Bipolar disorder                          |
| 380094                    | Carpal tunnel syndrome                    |
| 255573                    | Chronic obstructive lung disease          |
| 257012                    | Chronic sinusitis                         |
| 443617                    | Conduct disorder                          |
| 134438                    | Contact dermatitis                        |
| 78619                     | Contusion of knee                         |
| 378752                    | Corneal opacity                           |
| 137063                    | Corns and callus                          |
| 133228                    | Dental caries                             |
| 134681                    | Diffuse spasm of esophagus                |
| 432251                    | Disease caused by parasite                |
| 378161                    | Disorder of ear                           |
| 139057                    | Disorder of oral soft tissues             |
| 31057                     | Disorder of pharynx                       |
| 138225                    | Disorder of sebaceous gland               |
| 440329                    | Herpes zoster without complication        |
| 441788                    | Human papilloma virus infection           |
| 140673                    | Hypothyroidism                            |
| 374375                    | Impacted cerumen                          |
| 139099                    | Ingrowing nail                            |
| 436962                    | Insomnia                                  |
| 201322                    | Internal hemorrhoids without complication |
| 132466                    | Lumbar sprain                             |
| 255891                    | Lupus erythematosus                       |
| 444100                    | Mood disorder                             |
| 440374                    | Obsessive-compulsive disorder             |
| 380733                    | Otalgia                                   |
| 372328                    | Otitis media                              |
| 4002650                   | Plantar fasciitis                         |
| 373478                    | Presbyopia                                |
| 436073                    | Psychotic disorder                        |
| 438688                    | Sarcoidosis                               |

|        |                               |
|--------|-------------------------------|
| 432597 | Schizoaffective schizophrenia |
| 435783 | Schizophrenia                 |
| 372409 | Sciatica                      |
| 73562  | Solitary sacroiliitis         |
| 133141 | Tinea pedis                   |
| 436070 | Vitamin D deficiency          |

**eTable 3.** Number of Patients Before and After Matching for Each Drug Comparison and Outcome HbA<sub>1c</sub>

| Dataset                       | Sulfonylureas (T) vs DPP4 inhibitors (C) |      |         |      | Sulfonylureas (T) vs Thiazolidinediones (C) |       |         |       | DPP4 inhibitors (T) vs Thiazolidinediones (C) |       |         |       |
|-------------------------------|------------------------------------------|------|---------|------|---------------------------------------------|-------|---------|-------|-----------------------------------------------|-------|---------|-------|
|                               | Unmatched                                |      | Matched |      | Unmatched                                   |       | Matched |       | Unmatched                                     |       | Matched |       |
|                               | T                                        | C    | T       | C    | T                                           | C     | T       | C     | T                                             | C     | T       | C     |
| Truven MarketScan CCAE        | 3738                                     | 1896 | 1001    | 1001 | 37387                                       | 16945 | 9714    | 9714  | 18962                                         | 16945 | 6871    | 6871  |
| Columbia University           | 2507                                     | 595  | 205     | 205  | 2507                                        | 759   | 269     | 269   | 595                                           | 759   | 175     | 175   |
| IQVIA Disease Analyser France | 1961                                     | 2008 | 774     | 774  | 1961                                        | 1020  | 499     | 499   | 2008                                          | 1020  | 389     | 389   |
| Truven MarketScan MDCR        | 7556                                     | 2771 | 1661    | 1661 | 7556                                        | 2424  | 1440    | 1440  | 2771                                          | 2424  | 942     | 942   |
| Mt. Sinai                     | 2913                                     | 1862 | 880     | 880  | 2913                                        | 1027  | 417     | 417   | 1862                                          | 1027  | 475     | 475   |
| Optum Clinformatics Data Mart | 103712                                   | 5068 | 2477    | 2477 | 103712                                      | 43764 | 22953   | 22953 | 50681                                         | 43764 | 16763   | 16763 |
| Ajou University, South Korea  | 1826                                     | 1330 | 576     | 576  | 1826                                        | 292   | 175     | 175   | 1330                                          | 292   | 205     | 205   |
| Stanford University           | 896                                      | 275  | 98      | 98   | 896                                         | 256   | 78      | 78    | 275                                           | 256   | 117     | 117   |

**eTable 4.** Number of Patients Before and After Matching for Each Drug Comparison and Outcome Myocardial Infarction

| Dataset                       | Sulfonylureas (T) vs DPP4 inhibitors (C) |       |         |       | Sulfonylureas (T) vs Thiazolidinediones (C) |       |         |       | DPP4 inhibitors (T) vs Thiazolidinediones (C) |       |         |       |
|-------------------------------|------------------------------------------|-------|---------|-------|---------------------------------------------|-------|---------|-------|-----------------------------------------------|-------|---------|-------|
|                               | Unmatched                                |       | Matched |       | Unmatched                                   |       | Matched |       | Unmatched                                     |       | Matched |       |
|                               | T                                        | C     | T       | C     | T                                           | C     | T       | C     | T                                             | C     | T       | C     |
| Truven MarketScan CCAE        | 37387                                    | 18962 | 12839   | 12839 | 37387                                       | 16945 | 10887   | 10887 | 18962                                         | 16945 | 8197    | 8197  |
| Columbia University           | 2507                                     | 595   | 304     | 304   | 2507                                        | 759   | 400     | 400   | 595                                           | 759   | 237     | 237   |
| IQVIA Disease Analyser France | 1961                                     | 2008  | 1081    | 1081  | 1961                                        | 1020  | 608     | 608   | 2008                                          | 1020  | 509     | 509   |
| Truven MarketScan MDCR        | 7556                                     | 2771  | 2008    | 2008  | 7556                                        | 2424  | 1578    | 1578  | 2771                                          | 2424  | 1072    | 1072  |
| Mt. Sinai                     | 2913                                     | 1862  | 1041    | 1041  | 2913                                        | 1027  | 517     | 517   | 1862                                          | 1027  | 554     | 554   |
| Optum Clinformatics Data Mart | 103721                                   | 50681 | 34303   | 34303 | 103712                                      | 43764 | 28549   | 28549 | 50681                                         | 43764 | 21505   | 21505 |
| Ajou University, South Korea  | 1826                                     | 1330  | 599     | 599   | 1826                                        | 292   | 181     | 181   | 1330                                          | 292   | 211     | 211   |
| Stanford University           | 896                                      | 275   | 167     | 167   | 896                                         | 256   | 134     | 134   | 275                                           | 256   | 175     | 175   |

**eTable 5.** Number of Patients Before and After Matching for Each Drug Comparison and Outcome Kidney Disorders

| Dataset                       | Sulfonylureas (T) vs DPP4 inhibitors (C) |       |         |       | Sulfonylureas (T) vs Thiazolidinediones (C) |       |         |       | DPP4 inhibitors (T) vs Thiazolidinediones (C) |       |         |       |
|-------------------------------|------------------------------------------|-------|---------|-------|---------------------------------------------|-------|---------|-------|-----------------------------------------------|-------|---------|-------|
|                               | Unmatched                                |       | Matched |       | Unmatched                                   |       | Matched |       | Unmatched                                     |       | Matched |       |
|                               | T                                        | C     | T       | C     | T                                           | C     | T       | C     | T                                             | C     | T       | C     |
| Truven MarketScan CCAE        | 37387                                    | 18962 | 11558   | 11558 | 37387                                       | 16945 | 9980    | 9980  | 18962                                         | 16945 | 7557    | 7557  |
| Columbia University           | 2507                                     | 595   | 304     | 304   | 2507                                        | 759   | 400     | 400   | 595                                           | 759   | 237     | 237   |
| IQVIA Disease Analyser France | 1961                                     | 2008  | 1056    | 1056  | 1961                                        | 1020  | 594     | 594   | 2008                                          | 1020  | 499     | 499   |
| Truven MarketScan MDCR        | 7556                                     | 2771  | 1554    | 1554  | 7556                                        | 2424  | 1272    | 1272  | 2771                                          | 2424  | 888     | 888   |
| Mt. Sinai                     | 2913                                     | 1862  | 1013    | 1013  | 2913                                        | 1027  | 501     | 501   | 1862                                          | 1027  | 538     | 538   |
| Optum Clinformatics Data Mart | 103721                                   | 50681 | 29060   | 29060 | 103712                                      | 43764 | 25775   | 25775 | 50681                                         | 43764 | 18927   | 18927 |
| Ajou University, South Korea  | 1826                                     | 1330  | 594     | 594   | 1826                                        | 292   | 180     | 180   | 1330                                          | 292   | 208     | 208   |
| Stanford University           | 896                                      | 275   | 147     | 147   | 896                                         | 256   | 126     | 126   | 275                                           | 256   | 165     | 165   |

**eTable 6.** Number of Patients Before and After Matching for Each Drug Comparison and Outcome Eye Disorders

| Dataset                       | Sulfonylureas (T) vs DPP4 inhibitors (C) |       |         |       | Sulfonylureas (T) vs Thiazolidinediones (C) |       |         |       | DPP4 inhibitors (T) vs Thiazolidinediones (C) |       |         |       |
|-------------------------------|------------------------------------------|-------|---------|-------|---------------------------------------------|-------|---------|-------|-----------------------------------------------|-------|---------|-------|
|                               | Unmatched                                |       | Matched |       | Unmatched                                   |       | Matched |       | Unmatched                                     |       | Matched |       |
|                               | T                                        | C     | T       | C     | T                                           | C     | T       | C     | T                                             | C     | T       | C     |
| Truven MarketScan CCAE        | 2507                                     | 595   | 304     | 304   | 2507                                        | 759   | 400     | 400   | 595                                           | 759   | 237     | 237   |
| Columbia University           | 2913                                     | 1862  | 1006    | 1006  | 2913                                        | 1027  | 472     | 472   | 1862                                          | 1027  | 529     | 529   |
| IQVIA Disease Analyser France | 1961                                     | 2008  | 1083    | 1083  | 1961                                        | 1020  | 604     | 604   | 2008                                          | 1020  | 508     | 508   |
| Truven MarketScan MDCR        | 1826                                     | 1330  | 599     | 599   | 1826                                        | 292   | 179     | 179   | 1330                                          | 292   | 210     | 210   |
| Mt. Sinai                     | 896                                      | 275   | 135     | 135   | 896                                         | 256   | 121     | 121   | 275                                           | 256   | 145     | 145   |
| Optum Clinformatics Data Mart | 7556                                     | 2771  | 1227    | 1227  | 7556                                        | 2424  | 1063    | 1063  | 2771                                          | 2424  | 732     | 732   |
| Ajou University, South Korea  | 37387                                    | 18962 | 10925   | 10925 | 37387                                       | 16945 | 9636    | 9636  | 18962                                         | 16945 | 7220    | 7220  |
| Stanford University           | 103721                                   | 50681 | 26460   | 26460 | 103712                                      | 43764 | 23773   | 23773 | 50681                                         | 43764 | 17470   | 17470 |

**eTable 7.** Age Information Before and After Matching for Each Drug Comparison Based on the Data From Truven MarketScan CCAE

| <b>Comparison: Sulfonylureas vs DPP4 inhibitors - Outcome: HbA1c</b>                 |               |                 |               |                 |
|--------------------------------------------------------------------------------------|---------------|-----------------|---------------|-----------------|
| Age group                                                                            | Unmatched     |                 | Matched       |                 |
|                                                                                      | Sulfonylureas | DPP4 inhibitors | Sulfonylureas | DPP4 inhibitors |
| 10-14                                                                                | 1             | 1               | NA            | 1               |
| 15-19                                                                                | 20            | 7               | 4             | 5               |
| 20-24                                                                                | 109           | 27              | 17            | 25              |
| 25-29                                                                                | 279           | 90              | 63            | 78              |
| 30-34                                                                                | 823           | 212             | 186           | 175             |
| 35-39                                                                                | 1740          | 512             | 398           | 390             |
| 40-44                                                                                | 3107          | 1159            | 878           | 892             |
| 45-49                                                                                | 5020          | 1907            | 1451          | 1442            |
| 50-54                                                                                | 7113          | 3059            | 2267          | 2252            |
| 55-59                                                                                | 7721          | 3600            | 2606          | 2618            |
| 60-64                                                                                | 6095          | 3129            | 2072          | 2060            |
| 65-69                                                                                | 228           | 129             | 69            | 73              |
| <b>Comparison: Sulfonylureas vs DPP4 inhibitors - Outcome: Myocardial Infarction</b> |               |                 |               |                 |
| Age group                                                                            | Unmatched     |                 | Matched       |                 |
|                                                                                      | Sulfonylureas | DPP4 inhibitors | Sulfonylureas | DPP4 inhibitors |
| 10-14                                                                                | 1             | 1               | NA            | 1               |
| 15-19                                                                                | 20            | 7               | 5             | 7               |
| 20-24                                                                                | 109           | 27              | 22            | 27              |
| 25-29                                                                                | 279           | 90              | 75            | 90              |
| 30-34                                                                                | 823           | 212             | 221           | 208             |
| 35-39                                                                                | 1740          | 512             | 473           | 504             |
| 40-44                                                                                | 3107          | 1159            | 1109          | 1124            |
| 45-49                                                                                | 5020          | 1907            | 1775          | 1806            |
| 50-54                                                                                | 7113          | 3059            | 2869          | 2870            |
| 55-59                                                                                | 7721          | 3600            | 3349          | 3289            |
| 60-64                                                                                | 6095          | 3129            | 2828          | 2801            |
| 65-69                                                                                | 228           | 129             | 113           | 112             |
| <b>Comparison: Sulfonylureas vs DPP4 inhibitors - Outcome: Kidney Disorders</b>      |               |                 |               |                 |
| Age group                                                                            | Unmatched     |                 | Matched       |                 |
|                                                                                      | Sulfonylureas | DPP4 inhibitors | Sulfonylureas | DPP4 inhibitors |
| 10-14                                                                                | 1             | 1               | NA            | 1               |
| 15-19                                                                                | 20            | 7               | 4             | 7               |
| 20-24                                                                                | 109           | 27              | 24            | 27              |
| 25-29                                                                                | 279           | 90              | 73            | 87              |
| 30-34                                                                                | 823           | 212             | 209           | 196             |
| 35-39                                                                                | 1740          | 512             | 430           | 460             |
| 40-44                                                                                | 3107          | 1159            | 1025          | 1036            |
| 45-49                                                                                | 5020          | 1907            | 1602          | 1667            |
| 50-54                                                                                | 7113          | 3059            | 2606          | 2610            |
| 55-59                                                                                | 7721          | 3600            | 3014          | 2922            |



|                                                                                         |               |                    |               |                    |
|-----------------------------------------------------------------------------------------|---------------|--------------------|---------------|--------------------|
| 60-64                                                                                   | 6095          | 3129               | 2468          | 2439               |
| 65-69                                                                                   | 228           | 129                | 103           | 106                |
| <b>Comparison: Sulfonylureas vs DPP4 inhibitors - Outcome: Eye Disorders</b>            |               |                    |               |                    |
| Age group                                                                               | Unmatched     |                    | Matched       |                    |
|                                                                                         | Sulfonylureas | DPP4 inhibitors    | Sulfonylureas | DPP4 inhibitors    |
| 10-14                                                                                   | 1             | 1                  | NA            | 1                  |
| 15-19                                                                                   | 20            | 7                  | 4             | 7                  |
| 20-24                                                                                   | 109           | 27                 | 21            | 27                 |
| 25-29                                                                                   | 279           | 90                 | 73            | 90                 |
| 30-34                                                                                   | 823           | 212                | 210           | 200                |
| 35-39                                                                                   | 1740          | 512                | 457           | 474                |
| 40-44                                                                                   | 3107          | 1159               | 1011          | 1037               |
| 45-49                                                                                   | 5020          | 1907               | 1583          | 1645               |
| 50-54                                                                                   | 7113          | 3059               | 2496          | 2478               |
| 55-59                                                                                   | 7721          | 3600               | 2777          | 2744               |
| 60-64                                                                                   | 6095          | 3129               | 2205          | 2131               |
| 65-69                                                                                   | 228           | 129                | 88            | 91                 |
| <b>Comparison: Sulfonylureas vs Thiazolidinediones - Outcome: HbA1c</b>                 |               |                    |               |                    |
| Age group                                                                               | Unmatched     |                    | Matched       |                    |
|                                                                                         | Sulfonylureas | Thiazolidinediones | Sulfonylureas | Thiazolidinediones |
| 10-14                                                                                   | 1             | 1                  | NA            | 1                  |
| 15-19                                                                                   | 20            | 9                  | 6             | 7                  |
| 20-24                                                                                   | 106           | 24                 | 27            | 21                 |
| 25-29                                                                                   | 287           | 67                 | 58            | 62                 |
| 30-34                                                                                   | 803           | 262                | 252           | 232                |
| 35-39                                                                                   | 1709          | 566                | 504           | 488                |
| 40-44                                                                                   | 3014          | 1067               | 919           | 929                |
| 45-49                                                                                   | 4870          | 1847               | 1663          | 1632               |
| 50-54                                                                                   | 6970          | 2715               | 2301          | 2337               |
| 55-59                                                                                   | 7595          | 2902               | 2491          | 2483               |
| 60-64                                                                                   | 6171          | 1832               | 1451          | 1484               |
| 65-69                                                                                   | 236           | 49                 | 42            | 38                 |
| <b>Comparison: Sulfonylureas vs Thiazolidinediones - Outcome: Myocardial Infarction</b> |               |                    |               |                    |
| Age group                                                                               | Unmatched     |                    | Matched       |                    |
|                                                                                         | Sulfonylureas | Thiazolidinediones | Sulfonylureas | Thiazolidinediones |
| 10-14                                                                                   | 1             | 1                  | NA            | 1                  |
| 15-19                                                                                   | 20            | 9                  | 7             | 9                  |
| 20-24                                                                                   | 106           | 24                 | 31            | 24                 |
| 25-29                                                                                   | 287           | 67                 | 65            | 67                 |
| 30-34                                                                                   | 803           | 262                | 271           | 258                |
| 35-39                                                                                   | 1709          | 566                | 554           | 557                |
| 40-44                                                                                   | 3014          | 1067               | 1002          | 1033               |
| 45-49                                                                                   | 4870          | 1847               | 1777          | 1774               |
| 50-54                                                                                   | 6970          | 2715               | 2591          | 2584               |
| 55-59                                                                                   | 7595          | 2902               | 2790          | 2753               |

|                                                                                    |                 |                    |                 |                    |
|------------------------------------------------------------------------------------|-----------------|--------------------|-----------------|--------------------|
| 60-64                                                                              | 6171            | 1832               | 1745            | 1778               |
| 65-69                                                                              | 236             | 49                 | 54              | 49                 |
| <b>Comparison: Sulfonylureas vs Thiazolidinediones - Outcome: Kidney Disorders</b> |                 |                    |                 |                    |
| Age group                                                                          | Unmatched       |                    | Matched         |                    |
|                                                                                    | Sulfonylureas   | Thiazolidinediones | Sulfonylureas   | Thiazolidinediones |
| 10-14                                                                              | 1               | 1                  | NA              | 1                  |
| 15-19                                                                              | 20              | 9                  | 6               | 8                  |
| 20-24                                                                              | 106             | 24                 | 25              | 24                 |
| 25-29                                                                              | 287             | 67                 | 64              | 66                 |
| 30-34                                                                              | 803             | 262                | 260             | 240                |
| 35-39                                                                              | 1709            | 566                | 503             | 528                |
| 40-44                                                                              | 3014            | 1067               | 915             | 962                |
| 45-49                                                                              | 4870            | 1847               | 1634            | 1675               |
| 50-54                                                                              | 6970            | 2715               | 2411            | 2365               |
| 55-59                                                                              | 7595            | 2902               | 2552            | 2500               |
| 60-64                                                                              | 6171            | 1832               | 1564            | 1568               |
| 65-69                                                                              | 236             | 49                 | 46              | 43                 |
| <b>Comparison: Sulfonylureas vs Thiazolidinediones - Outcome: Eye Disorders</b>    |                 |                    |                 |                    |
| Age group                                                                          | Unmatched       |                    | Matched         |                    |
|                                                                                    | Sulfonylureas   | Thiazolidinediones | Sulfonylureas   | Thiazolidinediones |
| 10-14                                                                              | 1               | 1                  | NA              | 1                  |
| 15-19                                                                              | 20              | 9                  | 5               | 9                  |
| 20-24                                                                              | 106             | 24                 | 32              | 23                 |
| 25-29                                                                              | 287             | 67                 | 68              | 66                 |
| 30-34                                                                              | 803             | 262                | 258             | 250                |
| 35-39                                                                              | 1709            | 566                | 525             | 529                |
| 40-44                                                                              | 3014            | 1067               | 946             | 981                |
| 45-49                                                                              | 4870            | 1847               | 1656            | 1641               |
| 50-54                                                                              | 6970            | 2715               | 2335            | 2304               |
| 55-59                                                                              | 7595            | 2902               | 2348            | 2356               |
| 60-64                                                                              | 6171            | 1832               | 1421            | 1437               |
| 65-69                                                                              | 236             | 49                 | 42              | 39                 |
| <b>Comparison: DPP4 inhibitors vs Thiazolidinediones - Outcome: HbA1c</b>          |                 |                    |                 |                    |
| Age group                                                                          | Unmatched       |                    | Matched         |                    |
|                                                                                    | DPP4 inhibitors | Thiazolidinediones | DPP4 inhibitors | Thiazolidinediones |
| 10-14                                                                              | 1               | 1                  | 1               | 1                  |
| 15-19                                                                              | 9               | 13                 | 4               | 7                  |
| 20-24                                                                              | 32              | 28                 | 22              | 15                 |
| 25-29                                                                              | 115             | 89                 | 57              | 54                 |
| 30-34                                                                              | 273             | 336                | 166             | 155                |
| 35-39                                                                              | 636             | 730                | 354             | 322                |
| 40-44                                                                              | 1378            | 1379               | 669             | 659                |
| 45-49                                                                              | 2261            | 2364               | 1086            | 1084               |
| 50-54                                                                              | 3613            | 3422               | 1594            | 1614               |

| 55-59                                                                                     | 4151            | 3534               | 1685            | 1676               |
|-------------------------------------------------------------------------------------------|-----------------|--------------------|-----------------|--------------------|
| 60-64                                                                                     | 3627            | 2260               | 1189            | 1248               |
| 65-69                                                                                     | 135             | 58                 | 44              | 36                 |
| <b>Comparison: DPP4 inhibitors vs Thiazolidinediones - Outcome: Myocardial Infarction</b> |                 |                    |                 |                    |
| Age group                                                                                 | Unmatched       |                    | Matched         |                    |
|                                                                                           | DPP4 inhibitors | Thiazolidinediones | DPP4 inhibitors | Thiazolidinediones |
| 10-14                                                                                     | 1               | 1                  | 1               | 1                  |
| 15-19                                                                                     | 9               | 13                 | 4               | 9                  |
| 20-24                                                                                     | 32              | 28                 | 25              | 18                 |
| 25-29                                                                                     | 115             | 89                 | 63              | 59                 |
| 30-34                                                                                     | 273             | 336                | 198             | 181                |
| 35-39                                                                                     | 636             | 730                | 426             | 403                |
| 40-44                                                                                     | 1378            | 1379               | 778             | 778                |
| 45-49                                                                                     | 2261            | 2364               | 1277            | 1259               |
| 50-54                                                                                     | 3613            | 3422               | 1911            | 1888               |
| 55-59                                                                                     | 4151            | 3534               | 1974            | 2004               |
| 60-64                                                                                     | 3627            | 2260               | 1494            | 1553               |
| 65-69                                                                                     | 135             | 58                 | 46              | 44                 |
| <b>Comparison: DPP4 inhibitors vs Thiazolidinediones - Outcome: Kidney Disorders</b>      |                 |                    |                 |                    |
| Age group                                                                                 | Unmatched       |                    | Matched         |                    |
|                                                                                           | DPP4 inhibitors | Thiazolidinediones | DPP4 inhibitors | Thiazolidinediones |
| 10-14                                                                                     | 1               | 1                  | 1               | 1                  |
| 15-19                                                                                     | 9               | 13                 | 4               | 8                  |
| 20-24                                                                                     | 32              | 28                 | 23              | 15                 |
| 25-29                                                                                     | 115             | 89                 | 60              | 58                 |
| 30-34                                                                                     | 273             | 336                | 186             | 170                |
| 35-39                                                                                     | 636             | 730                | 400             | 373                |
| 40-44                                                                                     | 1378            | 1379               | 727             | 725                |
| 45-49                                                                                     | 2261            | 2364               | 1222            | 1189               |
| 50-54                                                                                     | 3613            | 3422               | 1770            | 1751               |
| 55-59                                                                                     | 4151            | 3534               | 1772            | 1849               |
| 60-64                                                                                     | 3627            | 2260               | 1344            | 1381               |
| 65-69                                                                                     | 135             | 58                 | 48              | 37                 |
| <b>Comparison: DPP4 inhibitors vs Thiazolidinediones - Outcome: Eye Disorders</b>         |                 |                    |                 |                    |
| Age group                                                                                 | Unmatched       |                    | Matched         |                    |
|                                                                                           | DPP4 inhibitors | Thiazolidinediones | DPP4 inhibitors | Thiazolidinediones |
| 10-14                                                                                     | 1               | 1                  | 1               | 1                  |
| 15-19                                                                                     | 9               | 13                 | 5               | 10                 |
| 20-24                                                                                     | 32              | 28                 | 25              | 16                 |
| 25-29                                                                                     | 115             | 89                 | 63              | 55                 |
| 30-34                                                                                     | 273             | 336                | 189             | 171                |
| 35-39                                                                                     | 636             | 730                | 411             | 396                |

|       |      |      |      |      |
|-------|------|------|------|------|
| 40-44 | 1378 | 1379 | 727  | 741  |
| 45-49 | 2261 | 2364 | 1191 | 1143 |
| 50-54 | 3613 | 3422 | 1674 | 1679 |
| 55-59 | 4151 | 3534 | 1688 | 1725 |
| 60-64 | 3627 | 2260 | 1205 | 1251 |
| 65-69 | 135  | 58   | 41   | 32   |

**eTable 8.** Age Information Before and After Matching for Each Drug Comparison Based on the Data From Columbia University

| <b>Comparison: Sulfonylureas vs DPP4 inhibitors - Outcome: HbA1c</b>                 |               |                 |               |                 |
|--------------------------------------------------------------------------------------|---------------|-----------------|---------------|-----------------|
| Age group                                                                            | Unmatched     |                 | Matched       |                 |
|                                                                                      | Sulfonylureas | DPP4 inhibitors | Sulfonylureas | DPP4 inhibitors |
| 25-29                                                                                | 24            | 2               | 2             | 2               |
| 30-34                                                                                | 26            | 4               | 1             | 4               |
| 35-39                                                                                | 49            | 8               | 1             | 3               |
| 40-44                                                                                | 121           | 3               | 3             | 3               |
| 45-49                                                                                | 175           | 20              | 14            | 13              |
| 50-54                                                                                | 280           | 32              | 21            | 23              |
| 55-59                                                                                | 304           | 46              | 30            | 28              |
| 60-64                                                                                | 336           | 52              | 41            | 26              |
| 65-69                                                                                | 312           | 49              | 28            | 26              |
| 70-74                                                                                | 275           | 47              | 17            | 31              |
| 75-79                                                                                | 168           | 30              | 16            | 17              |
| 80-84                                                                                | 116           | 28              | 17            | 11              |
| 85-89                                                                                | 54            | 24              | 13            | 14              |
| 90-94                                                                                | 15            | 7               | 1             | 3               |
| 95-99                                                                                | 2             | 1               | NA            | 1               |
| <b>Comparison: Sulfonylureas vs DPP4 inhibitors - Outcome: Myocardial Infarction</b> |               |                 |               |                 |
| Age group                                                                            | Unmatched     |                 | Matched       |                 |
|                                                                                      | Sulfonylureas | DPP4 inhibitors | Sulfonylureas | DPP4 inhibitors |
| 25-29                                                                                | 24            | 2               | 1             | 2               |
| 30-34                                                                                | 26            | 4               | 2             | 4               |
| 35-39                                                                                | 49            | 8               | 4             | 8               |
| 40-44                                                                                | 121           | 3               | 6             | 3               |
| 45-49                                                                                | 175           | 20              | 16            | 20              |
| 50-54                                                                                | 280           | 32              | 32            | 29              |
| 55-59                                                                                | 304           | 46              | 43            | 43              |
| 60-64                                                                                | 336           | 52              | 51            | 39              |
| 65-69                                                                                | 312           | 49              | 52            | 42              |
| 70-74                                                                                | 275           | 47              | 35            | 40              |
| 75-79                                                                                | 168           | 30              | 30            | 24              |
| 80-84                                                                                | 116           | 28              | 19            | 23              |
| 85-89                                                                                | 54            | 24              | 12            | 20              |
| 90-94                                                                                | 15            | 7               | 1             | 6               |
| 95-99                                                                                | 2             | 1               | NA            | 1               |
| <b>Comparison: Sulfonylureas vs DPP4 inhibitors - Outcome: Kidney Disorders</b>      |               |                 |               |                 |
| Age group                                                                            | Unmatched     |                 | Matched       |                 |
|                                                                                      | Sulfonylureas | DPP4 inhibitors | Sulfonylureas | DPP4 inhibitors |
| 25-29                                                                                | 24            | 2               | 1             | 2               |
| 30-34                                                                                | 26            | 4               | NA            | 3               |
| 35-39                                                                                | 49            | 8               | 2             | 8               |
| 40-44                                                                                | 121           | 3               | 7             | 3               |

|       |     |    |    |    |
|-------|-----|----|----|----|
| 45-49 | 175 | 20 | 17 | 19 |
| 50-54 | 280 | 32 | 31 | 26 |
| 55-59 | 304 | 46 | 37 | 38 |
| 60-64 | 336 | 52 | 45 | 38 |
| 65-69 | 312 | 49 | 49 | 42 |
| 70-74 | 275 | 47 | 34 | 40 |
| 75-79 | 168 | 30 | 21 | 20 |
| 80-84 | 116 | 28 | 21 | 21 |
| 85-89 | 54  | 24 | 14 | 18 |
| 90-94 | 15  | 7  | 2  | 2  |
| 95-99 | 2   | 1  | NA | 1  |

**Comparison: Sulfonylureas vs DPP4 inhibitors - Outcome: Eye Disorders**

| Age group | Unmatched     |                 | Matched       |                 |
|-----------|---------------|-----------------|---------------|-----------------|
|           | Sulfonylureas | DPP4 inhibitors | Sulfonylureas | DPP4 inhibitors |
| 25-29     | 24            | 2               | 3             | 2               |
| 30-34     | 26            | 4               | 1             | 4               |
| 35-39     | 49            | 8               | 3             | 8               |
| 40-44     | 121           | 3               | 3             | 3               |
| 45-49     | 175           | 20              | 16            | 17              |
| 50-54     | 280           | 32              | 31            | 27              |
| 55-59     | 304           | 46              | 36            | 41              |
| 60-64     | 336           | 52              | 39            | 37              |
| 65-69     | 312           | 49              | 53            | 37              |
| 70-74     | 275           | 47              | 33            | 34              |
| 75-79     | 168           | 30              | 23            | 19              |
| 80-84     | 116           | 28              | 15            | 19              |
| 85-89     | 54            | 24              | 12            | 15              |
| 90-94     | 15            | 7               | 1             | 5               |
| 95-99     | 2             | 1               | NA            | 1               |

**Comparison: Sulfonylureas vs Thiazolidinediones - Outcome: HbA1c**

| Age group | Unmatched     |                    | Matched       |                    |
|-----------|---------------|--------------------|---------------|--------------------|
|           | Sulfonylureas | Thiazolidinediones | Sulfonylureas | Thiazolidinediones |
| 20-24     | 7             | 1                  | NA            | 1                  |
| 25-29     | 23            | NA                 | 3             | NA                 |
| 30-34     | 27            | 3                  | 4             | 1                  |
| 35-39     | 47            | 9                  | 7             | 6                  |
| 40-44     | 120           | 17                 | 15            | 6                  |
| 45-49     | 166           | 39                 | 23            | 28                 |
| 50-54     | 267           | 52                 | 36            | 37                 |
| 55-59     | 309           | 53                 | 33            | 29                 |
| 60-64     | 313           | 59                 | 48            | 42                 |
| 65-69     | 305           | 64                 | 36            | 35                 |
| 70-74     | 254           | 52                 | 29            | 34                 |
| 75-79     | 156           | 40                 | 13            | 26                 |
| 80-84     | 107           | 22                 | 12            | 15                 |

| 85-89                                                                                   | 54            | 11                 | 4             | 7                  |
|-----------------------------------------------------------------------------------------|---------------|--------------------|---------------|--------------------|
| 90-94                                                                                   | 16            | 3                  | 5             | 2                  |
| 95-99                                                                                   | 2             | NA                 | 1             | NA                 |
| <b>Comparison: Sulfonylureas vs Thiazolidinediones - Outcome: Myocardial Infarction</b> |               |                    |               |                    |
| Age group                                                                               | Unmatched     |                    | Matched       |                    |
|                                                                                         | Sulfonylureas | Thiazolidinediones | Sulfonylureas | Thiazolidinediones |
| 20-24                                                                                   | 7             | 1                  | 1             | 1                  |
| 25-29                                                                                   | 23            | NA                 | 3             | NA                 |
| 30-34                                                                                   | 27            | 3                  | 3             | 3                  |
| 35-39                                                                                   | 47            | 9                  | 8             | 9                  |
| 40-44                                                                                   | 120           | 17                 | 17            | 17                 |
| 45-49                                                                                   | 166           | 39                 | 26            | 38                 |
| 50-54                                                                                   | 267           | 52                 | 37            | 49                 |
| 55-59                                                                                   | 309           | 53                 | 62            | 52                 |
| 60-64                                                                                   | 313           | 59                 | 60            | 57                 |
| 65-69                                                                                   | 305           | 64                 | 61            | 58                 |
| 70-74                                                                                   | 254           | 52                 | 56            | 46                 |
| 75-79                                                                                   | 156           | 40                 | 25            | 37                 |
| 80-84                                                                                   | 107           | 22                 | 23            | 20                 |
| 85-89                                                                                   | 54            | 11                 | 13            | 10                 |
| 90-94                                                                                   | 16            | 3                  | 5             | 3                  |
| 95-99                                                                                   | 2             | NA                 | NA            | NA                 |
| <b>Comparison: Sulfonylureas vs Thiazolidinediones - Outcome: Kidney Disorders</b>      |               |                    |               |                    |
| Age group                                                                               | Unmatched     |                    | Matched       |                    |
|                                                                                         | Sulfonylureas | Thiazolidinediones | Sulfonylureas | Thiazolidinediones |
| 20-24                                                                                   | 7             | 1                  | 1             | 1                  |
| 25-29                                                                                   | 23            | NA                 | 4             | NA                 |
| 30-34                                                                                   | 27            | 3                  | 4             | 2                  |
| 35-39                                                                                   | 47            | 9                  | 6             | 9                  |
| 40-44                                                                                   | 120           | 17                 | 17            | 16                 |
| 45-49                                                                                   | 166           | 39                 | 28            | 37                 |
| 50-54                                                                                   | 267           | 52                 | 29            | 40                 |
| 55-59                                                                                   | 309           | 53                 | 64            | 47                 |
| 60-64                                                                                   | 313           | 59                 | 52            | 57                 |
| 65-69                                                                                   | 305           | 64                 | 60            | 60                 |
| 70-74                                                                                   | 254           | 52                 | 51            | 45                 |
| 75-79                                                                                   | 156           | 40                 | 25            | 31                 |
| 80-84                                                                                   | 107           | 22                 | 19            | 16                 |
| 85-89                                                                                   | 54            | 11                 | 9             | 9                  |
| 90-94                                                                                   | 16            | 3                  | 3             | 2                  |
| 95-99                                                                                   | 2             | NA                 | NA            | NA                 |
| <b>Comparison: Sulfonylureas vs Thiazolidinediones - Outcome: Eye Disorders</b>         |               |                    |               |                    |
| Age group                                                                               | Unmatched     |                    | Matched       |                    |
|                                                                                         | Sulfonylureas | Thiazolidinediones | Sulfonylureas | Thiazolidinediones |
| 20-24                                                                                   | 7             | 1                  |               |                    |

|       |     |    |    |    |
|-------|-----|----|----|----|
| 25-29 | 23  | NA | 1  | 1  |
| 30-34 | 27  | 3  | 5  | NA |
| 35-39 | 47  | 9  | 5  | 3  |
| 40-44 | 120 | 17 | 7  | 8  |
| 45-49 | 166 | 39 | 16 | 14 |
| 50-54 | 267 | 52 | 23 | 35 |
| 55-59 | 309 | 53 | 38 | 44 |
| 60-64 | 313 | 59 | 48 | 43 |
| 65-69 | 305 | 64 | 49 | 43 |
| 70-74 | 254 | 52 | 46 | 49 |
| 75-79 | 156 | 40 | 49 | 34 |
| 80-84 | 107 | 22 | 15 | 28 |
| 85-89 | 54  | 11 | 11 | 16 |
| 90-94 | 16  | 3  | 11 | 6  |
| 95-99 | 2   | NA | NA | NA |

**Comparison: DPP4 inhibitors vs Thiazolidinediones - Outcome: HbA1c**

| Age group | Unmatched       |                    | Matched         |                    |
|-----------|-----------------|--------------------|-----------------|--------------------|
|           | DPP4 inhibitors | Thiazolidinediones | DPP4 inhibitors | Thiazolidinediones |
| 20-24     | NA              | 2                  | NA              | 2                  |
| 25-29     | 3               | 2                  | 1               | NA                 |
| 30-34     | 4               | 4                  | 3               | NA                 |
| 35-39     | 12              | 12                 | 2               | 2                  |
| 40-44     | 11              | 27                 | 3               | 5                  |
| 45-49     | 32              | 59                 | 12              | 12                 |
| 50-54     | 59              | 87                 | 20              | 21                 |
| 55-59     | 87              | 98                 | 30              | 23                 |
| 60-64     | 79              | 106                | 24              | 29                 |
| 65-69     | 73              | 100                | 23              | 23                 |
| 70-74     | 60              | 82                 | 21              | 21                 |
| 75-79     | 37              | 59                 | 13              | 12                 |
| 80-84     | 34              | 35                 | 10              | 18                 |
| 85-89     | 28              | 15                 | 8               | 6                  |
| 90-94     | 8               | 4                  | 4               | 1                  |
| 95-99     | 1               | NA                 | 1               | NA                 |

**Comparison: DPP4 inhibitors vs Thiazolidinediones - Outcome: Myocardial Infarction**

| Age group | Unmatched       |                    | Matched         |                    |
|-----------|-----------------|--------------------|-----------------|--------------------|
|           | DPP4 inhibitors | Thiazolidinediones | DPP4 inhibitors | Thiazolidinediones |
| 20-24     | NA              | 2                  | NA              | 2                  |
| 25-29     | 3               | 2                  | 1               | 1                  |
| 30-34     | 4               | 4                  | 3               | 1                  |
| 35-39     | 12              | 12                 | 6               | 1                  |
| 40-44     | 11              | 27                 | 2               | 12                 |
| 45-49     | 32              | 59                 | 17              | 19                 |



|       |    |     |    |    |
|-------|----|-----|----|----|
| 50-54 | 59 | 87  | 32 | 29 |
| 55-59 | 87 | 98  | 38 | 34 |
| 60-64 | 79 | 106 | 27 | 37 |
| 65-69 | 73 | 100 | 33 | 33 |
| 70-74 | 60 | 82  | 29 | 23 |
| 75-79 | 37 | 59  | 17 | 20 |
| 80-84 | 34 | 35  | 16 | 18 |
| 85-89 | 28 | 15  | 10 | 4  |
| 90-94 | 8  | 4   | 5  | 3  |
| 95-99 | 1  | NA  | 1  | NA |

**Comparison: DPP4 inhibitors vs Thiazolidinediones - Outcome: Kidney Disorders**

| Age group | Unmatched       |                    | Matched         |                    |
|-----------|-----------------|--------------------|-----------------|--------------------|
|           | DPP4 inhibitors | Thiazolidinediones | DPP4 inhibitors | Thiazolidinediones |
| 20-24     | NA              | 2                  | NA              | 2                  |
| 25-29     | 3               | 2                  | 2               | 1                  |
| 30-34     | 4               | 4                  | 1               | 1                  |
| 35-39     | 12              | 12                 | 6               | 1                  |
| 40-44     | 11              | 27                 | 2               | 11                 |
| 45-49     | 32              | 59                 | 17              | 15                 |
| 50-54     | 59              | 87                 | 28              | 26                 |
| 55-59     | 87              | 98                 | 36              | 31                 |
| 60-64     | 79              | 106                | 27              | 34                 |
| 65-69     | 73              | 100                | 35              | 35                 |
| 70-74     | 60              | 82                 | 25              | 23                 |
| 75-79     | 37              | 59                 | 15              | 19                 |
| 80-84     | 34              | 35                 | 14              | 16                 |
| 85-89     | 28              | 15                 | 9               | 3                  |
| 90-94     | 8               | 4                  | 3               | 3                  |
| 95-99     | 1               | NA                 | 1               | NA                 |

**Comparison: DPP4 inhibitors vs Thiazolidinediones - Outcome: Eye Disorders**

| Age group | Unmatched       |                    | Matched         |                    |
|-----------|-----------------|--------------------|-----------------|--------------------|
|           | DPP4 inhibitors | Thiazolidinediones | DPP4 inhibitors | Thiazolidinediones |
| 20-24     | NA              | 2                  | NA              | 2                  |
| 25-29     | 3               | 2                  | 1               | 1                  |
| 30-34     | 4               | 4                  | 3               | NA                 |
| 35-39     | 12              | 12                 | 7               | 2                  |
| 40-44     | 11              | 27                 | 2               | 11                 |
| 45-49     | 32              | 59                 | 16              | 12                 |
| 50-54     | 59              | 87                 | 29              | 26                 |
| 55-59     | 87              | 98                 | 29              | 31                 |
| 60-64     | 79              | 106                | 30              | 29                 |
| 65-69     | 73              | 100                | 28              | 30                 |
| 70-74     | 60              | 82                 | 21              | 18                 |

|       |    |    |    |    |
|-------|----|----|----|----|
| 75-79 | 37 | 59 | 12 | 21 |
| 80-84 | 34 | 35 | 14 | 16 |
| 85-89 | 28 | 15 | 6  | 4  |
| 90-94 | 8  | 4  | 5  | 1  |
| 95-99 | 1  | NA | 1  | NA |

**eTable 9.** Age Information Before and After Matching for Each Drug Comparison Based on the Data From IQVIA Disease Analyzer France

| <b>Comparison: Sulfonylureas vs DPP4 inhibitors - Outcome: HbA1c</b>                 |               |                 |               |                 |
|--------------------------------------------------------------------------------------|---------------|-----------------|---------------|-----------------|
| Age group                                                                            | Unmatched     |                 | Matched       |                 |
|                                                                                      | Sulfonylureas | DPP4 inhibitors | Sulfonylureas | DPP4 inhibitors |
| 25-29                                                                                | 1             | 1               | 1             | NA              |
| 30-34                                                                                | 5             | 8               | 4             | 3               |
| 35-39                                                                                | 16            | 17              | 11            | 5               |
| 40-44                                                                                | 44            | 64              | 27            | 32              |
| 45-49                                                                                | 86            | 101             | 44            | 45              |
| 50-54                                                                                | 159           | 168             | 72            | 69              |
| 55-59                                                                                | 220           | 272             | 124           | 116             |
| 60-64                                                                                | 300           | 326             | 151           | 143             |
| 65-69                                                                                | 279           | 269             | 130           | 110             |
| 70-74                                                                                | 239           | 210             | 95            | 106             |
| 75-79                                                                                | 152           | 160             | 68            | 82              |
| 80-84                                                                                | 123           | 82              | 30            | 44              |
| 85-89                                                                                | 25            | 16              | 13            | 13              |
| 90-94                                                                                | 3             | 5               | 1             | 3               |
| <b>Comparison: Sulfonylureas vs DPP4 inhibitors - Outcome: Myocardial Infarction</b> |               |                 |               |                 |
| Age group                                                                            | Unmatched     |                 | Matched       |                 |
|                                                                                      | Sulfonylureas | DPP4 inhibitors | Sulfonylureas | DPP4 inhibitors |
| 25-29                                                                                | 1             | 1               | 1             | NA              |
| 30-34                                                                                | 5             | 8               | 4             | 4               |
| 35-39                                                                                | 16            | 17              | 13            | 9               |
| 40-44                                                                                | 44            | 64              | 36            | 38              |
| 45-49                                                                                | 86            | 101             | 56            | 66              |
| 50-54                                                                                | 159           | 168             | 93            | 95              |
| 55-59                                                                                | 220           | 272             | 168           | 159             |
| 60-64                                                                                | 300           | 326             | 211           | 185             |
| 65-69                                                                                | 279           | 269             | 179           | 177             |
| 70-74                                                                                | 239           | 210             | 140           | 151             |
| 75-79                                                                                | 152           | 160             | 105           | 115             |
| 80-84                                                                                | 123           | 82              | 46            | 61              |
| 85-89                                                                                | 25            | 16              | 21            | 11              |
| 90-94                                                                                | 3             | 5               | 2             | 4               |
| <b>Comparison: Sulfonylureas vs DPP4 inhibitors - Outcome: Kidney Disorders</b>      |               |                 |               |                 |
| Age group                                                                            | Unmatched     |                 | Matched       |                 |
|                                                                                      | Sulfonylureas | DPP4 inhibitors | Sulfonylureas | DPP4 inhibitors |
| 25-29                                                                                | 1             | 1               | 1             | NA              |
| 30-34                                                                                | 5             | 8               | 4             | 4               |
| 35-39                                                                                | 16            | 17              | 13            | 9               |
| 40-44                                                                                | 44            | 64              | 36            | 39              |
| 45-49                                                                                | 86            | 101             | 55            | 62              |
| 50-54                                                                                | 159           | 168             | 92            | 92              |

|                                                                                         |               |                    |               |                    |
|-----------------------------------------------------------------------------------------|---------------|--------------------|---------------|--------------------|
| 55-59                                                                                   | 220           | 272                | 162           | 155                |
| 60-64                                                                                   | 300           | 326                | 205           | 182                |
| 65-69                                                                                   | 279           | 269                | 179           | 173                |
| 70-74                                                                                   | 239           | 210                | 134           | 148                |
| 75-79                                                                                   | 152           | 160                | 102           | 109                |
| 80-84                                                                                   | 123           | 82                 | 44            | 61                 |
| 85-89                                                                                   | 25            | 16                 | 21            | 12                 |
| 90-94                                                                                   | 3             | 5                  | 2             | 4                  |
| <b>Comparison: Sulfonylureas vs DPP4 inhibitors - Outcome: Eye Disorders</b>            |               |                    |               |                    |
| Age group                                                                               | Unmatched     |                    | Matched       |                    |
|                                                                                         | Sulfonylureas | DPP4 inhibitors    | Sulfonylureas | DPP4 inhibitors    |
| 25-29                                                                                   | 1             | 1                  | 1             | NA                 |
| 30-34                                                                                   | 5             | 8                  | 4             | 4                  |
| 35-39                                                                                   | 16            | 17                 | 13            | 8                  |
| 40-44                                                                                   | 44            | 64                 | 36            | 38                 |
| 45-49                                                                                   | 86            | 101                | 57            | 67                 |
| 50-54                                                                                   | 159           | 168                | 94            | 98                 |
| 55-59                                                                                   | 220           | 272                | 168           | 160                |
| 60-64                                                                                   | 300           | 326                | 211           | 182                |
| 65-69                                                                                   | 279           | 269                | 180           | 177                |
| 70-74                                                                                   | 239           | 210                | 137           | 151                |
| 75-79                                                                                   | 152           | 160                | 107           | 116                |
| 80-84                                                                                   | 123           | 82                 | 46            | 60                 |
| 85-89                                                                                   | 25            | 16                 | 20            | 12                 |
| 90-94                                                                                   | 3             | 5                  | 3             | 4                  |
| <b>Comparison: Sulfonylureas vs Thiazolidinediones - Outcome: HbA1c</b>                 |               |                    |               |                    |
| Age group                                                                               | Unmatched     |                    | Matched       |                    |
|                                                                                         | Sulfonylureas | Thiazolidinediones | Sulfonylureas | Thiazolidinediones |
| 20-24                                                                                   | NA            | 1                  | NA            | 1                  |
| 25-29                                                                                   | 1             | 3                  | 1             | 2                  |
| 30-34                                                                                   | 6             | 3                  | 1             | 3                  |
| 35-39                                                                                   | 20            | 9                  | 4             | 7                  |
| 40-44                                                                                   | 46            | 18                 | 10            | 11                 |
| 45-49                                                                                   | 97            | 52                 | 27            | 27                 |
| 50-54                                                                                   | 166           | 108                | 68            | 58                 |
| 55-59                                                                                   | 242           | 143                | 91            | 89                 |
| 60-64                                                                                   | 315           | 162                | 105           | 94                 |
| 65-69                                                                                   | 310           | 125                | 68            | 75                 |
| 70-74                                                                                   | 243           | 117                | 70            | 72                 |
| 75-79                                                                                   | 163           | 61                 | 34            | 32                 |
| 80-84                                                                                   | 131           | 23                 | 9             | 18                 |
| 85-89                                                                                   | 26            | 4                  | 2             | 1                  |
| 90-94                                                                                   | 5             | 1                  | NA            | NA                 |
| <b>Comparison: Sulfonylureas vs Thiazolidinediones - Outcome: Myocardial Infarction</b> |               |                    |               |                    |
| Age                                                                                     | Unmatched     |                    | Matched       |                    |

| group | Sulfonylureas | Thiazolidinediones | Sulfonylureas | Thiazolidinediones |
|-------|---------------|--------------------|---------------|--------------------|
| 20-24 | NA            | 1                  | NA            | 1                  |
| 25-29 | 1             | 3                  | 1             | 3                  |
| 30-34 | 6             | 3                  | 1             | 3                  |
| 35-39 | 20            | 9                  | 3             | 7                  |
| 40-44 | 46            | 18                 | 17            | 13                 |
| 45-49 | 97            | 52                 | 34            | 36                 |
| 50-54 | 166           | 108                | 78            | 62                 |
| 55-59 | 242           | 143                | 103           | 106                |
| 60-64 | 315           | 162                | 125           | 115                |
| 65-69 | 310           | 125                | 80            | 95                 |
| 70-74 | 243           | 117                | 81            | 81                 |
| 75-79 | 163           | 61                 | 46            | 42                 |
| 80-84 | 131           | 23                 | 14            | 22                 |
| 85-89 | 26            | 4                  | 4             | 1                  |
| 90-94 | 5             | 1                  | 1             | 1                  |

**Comparison: Sulfonylureas vs Thiazolidinediones - Outcome: Kidney Disorders**

| Age group | Unmatched     |                    | Matched       |                    |
|-----------|---------------|--------------------|---------------|--------------------|
|           | Sulfonylureas | Thiazolidinediones | Sulfonylureas | Thiazolidinediones |
| 20-24     | NA            | 1                  | NA            | 1                  |
| 25-29     | 1             | 3                  | 1             | 3                  |
| 30-34     | 6             | 3                  | 2             | 3                  |
| 35-39     | 20            | 9                  | 1             | 6                  |
| 40-44     | 46            | 18                 | 17            | 13                 |
| 45-49     | 97            | 52                 | 34            | 35                 |
| 50-54     | 166           | 108                | 78            | 61                 |
| 55-59     | 242           | 143                | 100           | 104                |
| 60-64     | 315           | 162                | 123           | 113                |
| 65-69     | 310           | 125                | 78            | 89                 |
| 70-74     | 243           | 117                | 77            | 81                 |
| 75-79     | 163           | 61                 | 44            | 42                 |
| 80-84     | 131           | 23                 | 13            | 21                 |
| 85-89     | 26            | 4                  | 5             | 1                  |
| 90-94     | 5             | 1                  | 1             | 1                  |

**Comparison: Sulfonylureas vs Thiazolidinediones - Outcome: Eye Disorders**

| Age group | Unmatched     |                    | Matched       |                    |
|-----------|---------------|--------------------|---------------|--------------------|
|           | Sulfonylureas | Thiazolidinediones | Sulfonylureas | Thiazolidinediones |
| 20-24     | NA            | 1                  | NA            | 1                  |
| 25-29     | 1             | 3                  | 1             | 3                  |
| 30-34     | 6             | 3                  | 1             | 3                  |
| 35-39     | 20            | 9                  | 2             | 7                  |
| 40-44     | 46            | 18                 | 16            | 13                 |
| 45-49     | 97            | 52                 | 33            | 36                 |
| 50-54     | 166           | 108                | 77            | 61                 |
| 55-59     | 242           | 143                | 103           | 108                |

|                                                                                           |                 |                    |                 |                    |
|-------------------------------------------------------------------------------------------|-----------------|--------------------|-----------------|--------------------|
| 60-64                                                                                     | 315             | 162                | 126             | 117                |
| 65-69                                                                                     | 310             | 125                | 79              | 94                 |
| 70-74                                                                                     | 243             | 117                | 82              | 80                 |
| 75-79                                                                                     | 163             | 61                 | 48              | 41                 |
| 80-84                                                                                     | 131             | 23                 | 13              | 20                 |
| 85-89                                                                                     | 26              | 4                  | 4               | 1                  |
| 90-94                                                                                     | 5               | 1                  | 1               | 1                  |
| <b>Comparison: DPP4 inhibitors vs Thiazolidinediones - Outcome: HbA1c</b>                 |                 |                    |                 |                    |
| Age group                                                                                 | Unmatched       |                    | Matched         |                    |
|                                                                                           | DPP4 inhibitors | Thiazolidinediones | DPP4 inhibitors | Thiazolidinediones |
| 20-24                                                                                     | NA              | 1                  | NA              | 1                  |
| 25-29                                                                                     | 1               | 3                  | NA              | 2                  |
| 30-34                                                                                     | 9               | 3                  | 2               | 3                  |
| 35-39                                                                                     | 22              | 8                  | 4               | 6                  |
| 40-44                                                                                     | 63              | 20                 | 13              | 12                 |
| 45-49                                                                                     | 113             | 56                 | 21              | 22                 |
| 50-54                                                                                     | 185             | 110                | 47              | 45                 |
| 55-59                                                                                     | 299             | 136                | 69              | 75                 |
| 60-64                                                                                     | 344             | 155                | 65              | 70                 |
| 65-69                                                                                     | 282             | 122                | 58              | 48                 |
| 70-74                                                                                     | 216             | 129                | 60              | 54                 |
| 75-79                                                                                     | 177             | 66                 | 28              | 33                 |
| 80-84                                                                                     | 91              | 24                 | 10              | 16                 |
| 85-89                                                                                     | 19              | 6                  | 9               | 1                  |
| 90-94                                                                                     | 7               | 1                  | 2               | NA                 |
| <b>Comparison: DPP4 inhibitors vs Thiazolidinediones - Outcome: Myocardial Infarction</b> |                 |                    |                 |                    |
| Age group                                                                                 | Unmatched       |                    | Matched         |                    |
|                                                                                           | DPP4 inhibitors | Thiazolidinediones | DPP4 inhibitors | Thiazolidinediones |
| 20-24                                                                                     | NA              | 1                  | NA              | 1                  |
| 25-29                                                                                     | 1               | 3                  | NA              | 3                  |
| 30-34                                                                                     | 9               | 3                  | 2               | 3                  |
| 35-39                                                                                     | 22              | 8                  | 6               | 7                  |
| 40-44                                                                                     | 63              | 20                 | 17              | 15                 |
| 45-49                                                                                     | 113             | 56                 | 30              | 29                 |
| 50-54                                                                                     | 185             | 110                | 65              | 57                 |
| 55-59                                                                                     | 299             | 136                | 88              | 94                 |
| 60-64                                                                                     | 344             | 155                | 88              | 97                 |
| 65-69                                                                                     | 282             | 122                | 76              | 74                 |
| 70-74                                                                                     | 216             | 129                | 71              | 63                 |
| 75-79                                                                                     | 177             | 66                 | 39              | 39                 |
| 80-84                                                                                     | 91              | 24                 | 15              | 21                 |
| 85-89                                                                                     | 19              | 6                  | 7               | 2                  |
| 90-94                                                                                     | 7               | 1                  | 2               | 1                  |

| <b>Comparison: DPP4 inhibitors vs Thiazolidinediones - Outcome: Kidney Disorders</b> |                 |                    |                 |                    |
|--------------------------------------------------------------------------------------|-----------------|--------------------|-----------------|--------------------|
| Age group                                                                            | Unmatched       |                    | Matched         |                    |
|                                                                                      | DPP4 inhibitors | Thiazolidinediones | DPP4 inhibitors | Thiazolidinediones |
| 20-24                                                                                | NA              | 1                  | NA              | 1                  |
| 25-29                                                                                | 1               | 3                  | NA              | 3                  |
| 30-34                                                                                | 9               | 3                  | 2               | 3                  |
| 35-39                                                                                | 22              | 8                  | 5               | 7                  |
| 40-44                                                                                | 63              | 20                 | 18              | 15                 |
| 45-49                                                                                | 113             | 56                 | 30              | 29                 |
| 50-54                                                                                | 185             | 110                | 64              | 56                 |
| 55-59                                                                                | 299             | 136                | 86              | 93                 |
| 60-64                                                                                | 344             | 155                | 86              | 93                 |
| 65-69                                                                                | 282             | 122                | 77              | 73                 |
| 70-74                                                                                | 216             | 129                | 71              | 62                 |
| 75-79                                                                                | 177             | 66                 | 34              | 39                 |
| 80-84                                                                                | 91              | 24                 | 16              | 20                 |
| 85-89                                                                                | 19              | 6                  | 7               | 2                  |
| 90-94                                                                                | 7               | 1                  | 1               | 1                  |
| <b>Comparison: DPP4 inhibitors vs Thiazolidinediones - Outcome: Eye Disorders</b>    |                 |                    |                 |                    |
| Age group                                                                            | Unmatched       |                    | Matched         |                    |
|                                                                                      | DPP4 inhibitors | Thiazolidinediones | DPP4 inhibitors | Thiazolidinediones |
| 20-24                                                                                | NA              | 1                  | NA              | 1                  |
| 25-29                                                                                | 1               | 3                  | NA              | 3                  |
| 30-34                                                                                | 9               | 3                  | 2               | 3                  |
| 35-39                                                                                | 22              | 8                  | 6               | 7                  |
| 40-44                                                                                | 63              | 20                 | 16              | 15                 |
| 45-49                                                                                | 113             | 56                 | 30              | 28                 |
| 50-54                                                                                | 185             | 110                | 65              | 57                 |
| 55-59                                                                                | 299             | 136                | 87              | 95                 |
| 60-64                                                                                | 344             | 155                | 88              | 97                 |
| 65-69                                                                                | 282             | 122                | 77              | 75                 |
| 70-74                                                                                | 216             | 129                | 73              | 63                 |
| 75-79                                                                                | 177             | 66                 | 37              | 37                 |
| 80-84                                                                                | 91              | 24                 | 15              | 21                 |
| 85-89                                                                                | 19              | 6                  | 8               | 2                  |
| 90-94                                                                                | 7               | 1                  | 1               | 1                  |

**eTable 10.** Age Information Before and After Matching for Each Drug Comparison Based on the Data From Truven MarketScan MDCR

| <b>Comparison: Sulfonylureas vs DPP4 inhibitors - Outcome: HbA1c</b>                 |               |                 |               |                 |
|--------------------------------------------------------------------------------------|---------------|-----------------|---------------|-----------------|
| Age group                                                                            | Unmatched     |                 | Matched       |                 |
|                                                                                      | Sulfonylureas | DPP4 inhibitors | Sulfonylureas | DPP4 inhibitors |
| 45-49                                                                                | 4             | 1               | 1             | 1               |
| 50-54                                                                                | 19            | 3               | 3             | 2               |
| 55-59                                                                                | 41            | 20              | 22            | 18              |
| 60-64                                                                                | 76            | 34              | 37            | 32              |
| 65-69                                                                                | 3369          | 948             | 796           | 775             |
| 70-74                                                                                | 1659          | 532             | 388           | 414             |
| 75-79                                                                                | 944           | 288             | 211           | 218             |
| 80-84                                                                                | 527           | 182             | 146           | 142             |
| 85-89                                                                                | 180           | 59              | 46            | 48              |
| 90-94                                                                                | 43            | 13              | 9             | 10              |
| 95-99                                                                                | 4             | 1               | 2             | 1               |
| <b>Comparison: Sulfonylureas vs DPP4 inhibitors - Outcome: Myocardial Infarction</b> |               |                 |               |                 |
| Age group                                                                            | Unmatched     |                 | Matched       |                 |
|                                                                                      | Sulfonylureas | DPP4 inhibitors | Sulfonylureas | DPP4 inhibitors |
| 45-49                                                                                | 4             | 1               | NA            | 1               |
| 50-54                                                                                | 19            | 3               | 8             | 3               |
| 55-59                                                                                | 41            | 20              | 22            | 18              |
| 60-64                                                                                | 76            | 34              | 37            | 31              |
| 65-69                                                                                | 3369          | 948             | 945           | 933             |
| 70-74                                                                                | 1659          | 532             | 463           | 519             |
| 75-79                                                                                | 944           | 288             | 269           | 268             |
| 80-84                                                                                | 527           | 182             | 183           | 171             |
| 85-89                                                                                | 180           | 59              | 70            | 51              |
| 90-94                                                                                | 43            | 13              | 10            | 12              |
| 95-99                                                                                | 4             | 1               | 1             | 1               |
| <b>Comparison: Sulfonylureas vs DPP4 inhibitors - Outcome: Kidney Disorders</b>      |               |                 |               |                 |
| Age group                                                                            | Unmatched     |                 | Matched       |                 |
|                                                                                      | Sulfonylureas | DPP4 inhibitors | Sulfonylureas | DPP4 inhibitors |
| 45-49                                                                                | 4             | 1               | NA            | 1               |
| 50-54                                                                                | 19            | 3               | 3             | 3               |
| 55-59                                                                                | 41            | 20              | 13            | 14              |
| 60-64                                                                                | 76            | 34              | 31            | 28              |
| 65-69                                                                                | 3369          | 948             | 784           | 786             |
| 70-74                                                                                | 1659          | 532             | 369           | 389             |
| 75-79                                                                                | 944           | 288             | 188           | 191             |
| 80-84                                                                                | 527           | 182             | 125           | 106             |
| 85-89                                                                                | 180           | 59              | 36            | 29              |
| 90-94                                                                                | 43            | 13              | 4             | 7               |
| 95-99                                                                                | 4             | 1               | 1             | NA              |
| <b>Comparison: Sulfonylureas vs DPP4 inhibitors - Outcome: Eye Disorders</b>         |               |                 |               |                 |



| Age group                                                                               | Unmatched     |                    | Matched       |                    |
|-----------------------------------------------------------------------------------------|---------------|--------------------|---------------|--------------------|
|                                                                                         | Sulfonylureas | DPP4 inhibitors    | Sulfonylureas | DPP4 inhibitors    |
| 45-49                                                                                   | 4             | 1                  | 1             | 1                  |
| 50-54                                                                                   | 19            | 3                  | 7             | 3                  |
| 55-59                                                                                   | 41            | 20                 | 18            | 15                 |
| 60-64                                                                                   | 76            | 34                 | 26            | 27                 |
| 65-69                                                                                   | 3369          | 948                | 642           | 676                |
| 70-74                                                                                   | 1659          | 532                | 253           | 266                |
| 75-79                                                                                   | 944           | 288                | 141           | 130                |
| 80-84                                                                                   | 527           | 182                | 92            | 82                 |
| 85-89                                                                                   | 180           | 59                 | 39            | 23                 |
| 90-94                                                                                   | 43            | 13                 | 6             | 4                  |
| 95-99                                                                                   | 4             | 1                  | 2             | NA                 |
| <b>Comparison: Sulfonylureas vs Thiazolidinediones - Outcome: HbA1c</b>                 |               |                    |               |                    |
| Age group                                                                               | Unmatched     |                    | Matched       |                    |
|                                                                                         | Sulfonylureas | Thiazolidinediones | Sulfonylureas | Thiazolidinediones |
| 40-44                                                                                   | NA            | 1                  | NA            | 1                  |
| 45-49                                                                                   | 2             | 2                  | NA            | 2                  |
| 50-54                                                                                   | 20            | 7                  | 3             | 7                  |
| 55-59                                                                                   | 42            | 23                 | 15            | 19                 |
| 60-64                                                                                   | 73            | 21                 | 20            | 19                 |
| 65-69                                                                                   | 3324          | 757                | 670           | 663                |
| 70-74                                                                                   | 1630          | 424                | 377           | 370                |
| 75-79                                                                                   | 933           | 250                | 227           | 219                |
| 80-84                                                                                   | 522           | 108                | 97            | 93                 |
| 85-89                                                                                   | 188           | 42                 | 25            | 37                 |
| 90-94                                                                                   | 41            | 12                 | 6             | 10                 |
| <b>Comparison: Sulfonylureas vs Thiazolidinediones - Outcome: Myocardial Infarction</b> |               |                    |               |                    |
| Age group                                                                               | Unmatched     |                    | Matched       |                    |
|                                                                                         | Sulfonylureas | Thiazolidinediones | Sulfonylureas | Thiazolidinediones |
| 40-44                                                                                   | NA            | 1                  | NA            | 1                  |
| 45-49                                                                                   | 2             | 2                  | NA            | 2                  |
| 50-54                                                                                   | 20            | 7                  | 3             | 7                  |
| 55-59                                                                                   | 42            | 23                 | 15            | 20                 |
| 60-64                                                                                   | 73            | 21                 | 22            | 19                 |
| 65-69                                                                                   | 3324          | 757                | 725           | 743                |
| 70-74                                                                                   | 1630          | 424                | 405           | 400                |
| 75-79                                                                                   | 933           | 250                | 253           | 236                |
| 80-84                                                                                   | 522           | 108                | 118           | 99                 |
| 85-89                                                                                   | 188           | 42                 | 30            | 39                 |
| 90-94                                                                                   | 41            | 12                 | 7             | 12                 |
| <b>Comparison: Sulfonylureas vs Thiazolidinediones - Outcome: Kidney Disorders</b>      |               |                    |               |                    |
| Age group                                                                               | Unmatched     |                    | Matched       |                    |
|                                                                                         | Sulfonylureas | Thiazolidinediones | Sulfonylureas | Thiazolidinediones |
| 40-44                                                                                   | NA            | 1                  | NA            | 1                  |

|                                                                                           |                 |                    |                 |                    |
|-------------------------------------------------------------------------------------------|-----------------|--------------------|-----------------|--------------------|
| 45-49                                                                                     | 2               | 2                  | NA              | 1                  |
| 50-54                                                                                     | 20              | 7                  | 4               | 7                  |
| 55-59                                                                                     | 42              | 23                 | 18              | 18                 |
| 60-64                                                                                     | 73              | 21                 | 19              | 15                 |
| 65-69                                                                                     | 3324            | 757                | 609             | 623                |
| 70-74                                                                                     | 1630            | 424                | 330             | 326                |
| 75-79                                                                                     | 933             | 250                | 189             | 178                |
| 80-84                                                                                     | 522             | 108                | 76              | 71                 |
| 85-89                                                                                     | 188             | 42                 | 23              | 24                 |
| 90-94                                                                                     | 41              | 12                 | 4               | 8                  |
| <b>Comparison: Sulfonylureas vs Thiazolidinediones - Outcome: Eye Disorders</b>           |                 |                    |                 |                    |
| Age group                                                                                 | Unmatched       |                    | Matched         |                    |
|                                                                                           | Sulfonylureas   | Thiazolidinediones | Sulfonylureas   | Thiazolidinediones |
| 40-44                                                                                     | NA              | 1                  | NA              | 1                  |
| 45-49                                                                                     | 2               | 2                  | NA              | 2                  |
| 50-54                                                                                     | 20              | 7                  | 4               | 5                  |
| 55-59                                                                                     | 42              | 23                 | 12              | 20                 |
| 60-64                                                                                     | 73              | 21                 | 14              | 14                 |
| 65-69                                                                                     | 3324            | 757                | 565             | 566                |
| 70-74                                                                                     | 1630            | 424                | 267             | 237                |
| 75-79                                                                                     | 933             | 250                | 130             | 139                |
| 80-84                                                                                     | 522             | 108                | 54              | 53                 |
| 85-89                                                                                     | 188             | 42                 | 13              | 20                 |
| 90-94                                                                                     | 41              | 12                 | 4               | 6                  |
| <b>Comparison: DPP4 inhibitors vs Thiazolidinediones - Outcome: HbA1c</b>                 |                 |                    |                 |                    |
| Age group                                                                                 | Unmatched       |                    | Matched         |                    |
|                                                                                           | DPP4 inhibitors | Thiazolidinediones | DPP4 inhibitors | Thiazolidinediones |
| 45-49                                                                                     | 1               | 4                  | NA              | 1                  |
| 50-54                                                                                     | 6               | 10                 | 1               | 5                  |
| 55-59                                                                                     | 23              | 25                 | 9               | 13                 |
| 60-64                                                                                     | 34              | 21                 | 19              | 15                 |
| 65-69                                                                                     | 1157            | 1021               | 490             | 457                |
| 70-74                                                                                     | 629             | 536                | 186             | 217                |
| 75-79                                                                                     | 333             | 309                | 129             | 125                |
| 80-84                                                                                     | 210             | 147                | 83              | 81                 |
| 85-89                                                                                     | 74              | 47                 | 22              | 21                 |
| 90-94                                                                                     | 13              | 13                 | 3               | 7                  |
| <b>Comparison: DPP4 inhibitors vs Thiazolidinediones - Outcome: Myocardial Infarction</b> |                 |                    |                 |                    |
| Age group                                                                                 | Unmatched       |                    | Matched         |                    |
|                                                                                           | DPP4 inhibitors | Thiazolidinediones | DPP4 inhibitors | Thiazolidinediones |
| 45-49                                                                                     | 1               | 4                  | NA              | 1                  |
| 50-54                                                                                     | 6               | 10                 | 1               | 5                  |

|                                                                                      |                 |                    |                 |                    |
|--------------------------------------------------------------------------------------|-----------------|--------------------|-----------------|--------------------|
| 55-59                                                                                | 23              | 25                 | 9               | 16                 |
| 60-64                                                                                | 34              | 21                 | 17              | 15                 |
| 65-69                                                                                | 1157            | 1021               | 553             | 529                |
| 70-74                                                                                | 629             | 536                | 217             | 245                |
| 75-79                                                                                | 333             | 309                | 151             | 147                |
| 80-84                                                                                | 210             | 147                | 93              | 79                 |
| 85-89                                                                                | 74              | 47                 | 28              | 28                 |
| 90-94                                                                                | 13              | 13                 | 3               | 7                  |
| <b>Comparison: DPP4 inhibitors vs Thiazolidinediones - Outcome: Kidney Disorders</b> |                 |                    |                 |                    |
| Age group                                                                            | Unmatched       |                    | Matched         |                    |
|                                                                                      | DPP4 inhibitors | Thiazolidinediones | DPP4 inhibitors | Thiazolidinediones |
| 45-49                                                                                | 1               | 4                  | NA              | 1                  |
| 50-54                                                                                | 6               | 10                 | 1               | 5                  |
| 55-59                                                                                | 23              | 25                 | 8               | 13                 |
| 60-64                                                                                | 34              | 21                 | 17              | 13                 |
| 65-69                                                                                | 1157            | 1021               | 490             | 455                |
| 70-74                                                                                | 629             | 536                | 175             | 205                |
| 75-79                                                                                | 333             | 309                | 112             | 116                |
| 80-84                                                                                | 210             | 147                | 65              | 57                 |
| 85-89                                                                                | 74              | 47                 | 20              | 18                 |
| 90-94                                                                                | 13              | 13                 | NA              | 5                  |
| <b>Comparison: DPP4 inhibitors vs Thiazolidinediones - Outcome: Eye Disorders</b>    |                 |                    |                 |                    |
| Age group                                                                            | Unmatched       |                    | Matched         |                    |
|                                                                                      | DPP4 inhibitors | Thiazolidinediones | DPP4 inhibitors | Thiazolidinediones |
| 45-49                                                                                | 1               | 4                  | NA              | 1                  |
| 50-54                                                                                | 6               | 10                 | NA              | 3                  |
| 55-59                                                                                | 23              | 25                 | 6               | 14                 |
| 60-64                                                                                | 34              | 21                 | 13              | 11                 |
| 65-69                                                                                | 1157            | 1021               | 437             | 404                |
| 70-74                                                                                | 629             | 536                | 135             | 149                |
| 75-79                                                                                | 333             | 309                | 82              | 85                 |
| 80-84                                                                                | 210             | 147                | 48              | 45                 |
| 85-89                                                                                | 74              | 47                 | 10              | 17                 |
| 90-94                                                                                | 13              | 13                 | 1               | 3                  |

**eTable 11.** Age Information Before and After Matching for Each Drug Comparison Based on the Data From Mount Sinai

| <b>Comparison: Sulfonylureas vs DPP4 inhibitors - Outcome: HbA1c</b>                 |               |                 |               |                 |
|--------------------------------------------------------------------------------------|---------------|-----------------|---------------|-----------------|
| Age group                                                                            | Unmatched     |                 | Matched       |                 |
|                                                                                      | Sulfonylureas | DPP4 inhibitors | Sulfonylureas | DPP4 inhibitors |
| 15-19                                                                                | 1             | 2               | 1             | 1               |
| 20-24                                                                                | 1             | 2               | NA            | 2               |
| 25-29                                                                                | 6             | 5               | 1             | 3               |
| 30-34                                                                                | 22            | 6               | 7             | 5               |
| 35-39                                                                                | 49            | 14              | 10            | 13              |
| 40-44                                                                                | 85            | 37              | 29            | 30              |
| 45-49                                                                                | 144           | 61              | 54            | 45              |
| 50-54                                                                                | 240           | 125             | 85            | 96              |
| 55-59                                                                                | 317           | 179             | 132           | 140             |
| 60-64                                                                                | 297           | 186             | 148           | 145             |
| 65-69                                                                                | 369           | 172             | 147           | 135             |
| 70-74                                                                                | 261           | 144             | 109           | 115             |
| 75-79                                                                                | 195           | 107             | 82            | 83              |
| 80-84                                                                                | 116           | 65              | 51            | 47              |
| 85-89                                                                                | 57            | 16              | 16            | 14              |
| 90-94                                                                                | 15            | 6               | 8             | 6               |
| <b>Comparison: Sulfonylureas vs DPP4 inhibitors - Outcome: Myocardial Infarction</b> |               |                 |               |                 |
| Age group                                                                            | Unmatched     |                 | Matched       |                 |
|                                                                                      | Sulfonylureas | DPP4 inhibitors | Sulfonylureas | DPP4 inhibitors |
| 15-19                                                                                | 1             | 2               | NA            | 2               |
| 20-24                                                                                | 1             | 2               | 1             | 2               |
| 25-29                                                                                | 6             | 5               | 3             | 4               |
| 30-34                                                                                | 22            | 6               | 13            | 6               |
| 35-39                                                                                | 49            | 14              | 16            | 14              |
| 40-44                                                                                | 85            | 37              | 31            | 34              |
| 45-49                                                                                | 144           | 61              | 66            | 57              |
| 50-54                                                                                | 240           | 125             | 108           | 118             |
| 55-59                                                                                | 317           | 179             | 158           | 162             |
| 60-64                                                                                | 297           | 186             | 173           | 171             |
| 65-69                                                                                | 369           | 172             | 164           | 161             |
| 70-74                                                                                | 261           | 144             | 129           | 131             |
| 75-79                                                                                | 195           | 107             | 90            | 97              |
| 80-84                                                                                | 116           | 65              | 62            | 61              |
| 85-89                                                                                | 57            | 16              | 19            | 15              |
| 90-94                                                                                | 15            | 6               | 8             | 6               |
| <b>Comparison: Sulfonylureas vs DPP4 inhibitors - Outcome: Kidney Disorders</b>      |               |                 |               |                 |
| Age group                                                                            | Unmatched     |                 | Matched       |                 |
|                                                                                      | Sulfonylureas | DPP4 inhibitors | Sulfonylureas | DPP4 inhibitors |
| 15-19                                                                                | 1             | 2               | NA            | 1               |
| 20-24                                                                                | 1             | 2               | 1             | 2               |

|                                                                              |               |                    |               |                    |
|------------------------------------------------------------------------------|---------------|--------------------|---------------|--------------------|
| 25-29                                                                        | 6             | 5                  | 1             | 4                  |
| 30-34                                                                        | 22            | 6                  | 10            | 6                  |
| 35-39                                                                        | 49            | 14                 | 19            | 14                 |
| 40-44                                                                        | 85            | 37                 | 30            | 33                 |
| 45-49                                                                        | 144           | 61                 | 63            | 55                 |
| 50-54                                                                        | 240           | 125                | 101           | 116                |
| 55-59                                                                        | 317           | 179                | 151           | 162                |
| 60-64                                                                        | 297           | 186                | 165           | 167                |
| 65-69                                                                        | 369           | 172                | 166           | 153                |
| 70-74                                                                        | 261           | 144                | 132           | 130                |
| 75-79                                                                        | 195           | 107                | 90            | 94                 |
| 80-84                                                                        | 116           | 65                 | 57            | 56                 |
| 85-89                                                                        | 57            | 16                 | 19            | 14                 |
| 90-94                                                                        | 15            | 6                  | 8             | 6                  |
| <b>Comparison: Sulfonylureas vs DPP4 inhibitors - Outcome: Eye Disorders</b> |               |                    |               |                    |
| Age group                                                                    | Unmatched     |                    | Matched       |                    |
|                                                                              | Sulfonylureas | DPP4 inhibitors    | Sulfonylureas | DPP4 inhibitors    |
| 15-19                                                                        | 1             | 2                  | NA            | 2                  |
| 20-24                                                                        | 1             | 2                  | 1             | 2                  |
| 25-29                                                                        | 6             | 5                  | 2             | 4                  |
| 30-34                                                                        | 22            | 6                  | 11            | 6                  |
| 35-39                                                                        | 49            | 14                 | 16            | 14                 |
| 40-44                                                                        | 85            | 37                 | 28            | 34                 |
| 45-49                                                                        | 144           | 61                 | 63            | 55                 |
| 50-54                                                                        | 240           | 125                | 106           | 116                |
| 55-59                                                                        | 317           | 179                | 153           | 161                |
| 60-64                                                                        | 297           | 186                | 163           | 165                |
| 65-69                                                                        | 369           | 172                | 161           | 150                |
| 70-74                                                                        | 261           | 144                | 127           | 127                |
| 75-79                                                                        | 195           | 107                | 88            | 95                 |
| 80-84                                                                        | 116           | 65                 | 60            | 55                 |
| 85-89                                                                        | 57            | 16                 | 18            | 15                 |
| 90-94                                                                        | 15            | 6                  | 9             | 5                  |
| <b>Comparison: Sulfonylureas vs Thiazolidinediones - Outcome: HbA1c</b>      |               |                    |               |                    |
| Age group                                                                    | Unmatched     |                    | Matched       |                    |
|                                                                              | Sulfonylureas | Thiazolidinediones | Sulfonylureas | Thiazolidinediones |
| 25-29                                                                        | 4             | 1                  | NA            | 1                  |
| 30-34                                                                        | 24            | 4                  | 2             | 2                  |
| 35-39                                                                        | 47            | 11                 | 10            | 9                  |
| 40-44                                                                        | 96            | 24                 | 17            | 11                 |
| 45-49                                                                        | 150           | 45                 | 25            | 40                 |
| 50-54                                                                        | 261           | 70                 | 49            | 55                 |
| 55-59                                                                        | 334           | 72                 | 48            | 57                 |
| 60-64                                                                        | 348           | 80                 | 73            | 65                 |
| 65-69                                                                        | 403           | 84                 | 77            | 68                 |

|                                                                                         |               |                    |               |                    |
|-----------------------------------------------------------------------------------------|---------------|--------------------|---------------|--------------------|
| 70-74                                                                                   | 306           | 48                 | 38            | 39                 |
| 75-79                                                                                   | 228           | 48                 | 33            | 38                 |
| 80-84                                                                                   | 132           | 33                 | 28            | 25                 |
| 85-89                                                                                   | 63            | 6                  | 13            | 5                  |
| 90-94                                                                                   | 14            | 3                  | 2             | 2                  |
| 95-99                                                                                   | 3             | NA                 | 2             | NA                 |
| <b>Comparison: Sulfonylureas vs Thiazolidinediones - Outcome: Myocardial Infarction</b> |               |                    |               |                    |
| Age group                                                                               | Unmatched     |                    | Matched       |                    |
|                                                                                         | Sulfonylureas | Thiazolidinediones | Sulfonylureas | Thiazolidinediones |
| 25-29                                                                                   | 4             | 1                  | 1             | 1                  |
| 30-34                                                                                   | 24            | 4                  | 4             | 4                  |
| 35-39                                                                                   | 47            | 11                 | 9             | 11                 |
| 40-44                                                                                   | 96            | 24                 | 24            | 24                 |
| 45-49                                                                                   | 150           | 45                 | 33            | 44                 |
| 50-54                                                                                   | 261           | 70                 | 58            | 66                 |
| 55-59                                                                                   | 334           | 72                 | 59            | 72                 |
| 60-64                                                                                   | 348           | 80                 | 88            | 78                 |
| 65-69                                                                                   | 403           | 84                 | 93            | 80                 |
| 70-74                                                                                   | 306           | 48                 | 52            | 48                 |
| 75-79                                                                                   | 228           | 48                 | 48            | 47                 |
| 80-84                                                                                   | 132           | 33                 | 30            | 33                 |
| 85-89                                                                                   | 63            | 6                  | 15            | 6                  |
| 90-94                                                                                   | 14            | 3                  | 2             | 3                  |
| 95-99                                                                                   | 3             | NA                 | 1             | NA                 |
| <b>Comparison: Sulfonylureas vs Thiazolidinediones - Outcome: Kidney Disorders</b>      |               |                    |               |                    |
| Age group                                                                               | Unmatched     |                    | Matched       |                    |
|                                                                                         | Sulfonylureas | Thiazolidinediones | Sulfonylureas | Thiazolidinediones |
| 25-29                                                                                   | 4             | 1                  | NA            | 1                  |
| 30-34                                                                                   | 24            | 4                  | 4             | 4                  |
| 35-39                                                                                   | 47            | 11                 | 9             | 11                 |
| 40-44                                                                                   | 96            | 24                 | 26            | 24                 |
| 45-49                                                                                   | 150           | 45                 | 28            | 43                 |
| 50-54                                                                                   | 261           | 70                 | 54            | 65                 |
| 55-59                                                                                   | 334           | 72                 | 56            | 68                 |
| 60-64                                                                                   | 348           | 80                 | 86            | 75                 |
| 65-69                                                                                   | 403           | 84                 | 100           | 79                 |
| 70-74                                                                                   | 306           | 48                 | 51            | 46                 |
| 75-79                                                                                   | 228           | 48                 | 45            | 44                 |
| 80-84                                                                                   | 132           | 33                 | 25            | 32                 |
| 85-89                                                                                   | 63            | 6                  | 13            | 6                  |
| 90-94                                                                                   | 14            | 3                  | 2             | 3                  |
| 95-99                                                                                   | 3             | NA                 | 2             | NA                 |
| <b>Comparison: Sulfonylureas vs Thiazolidinediones - Outcome: Eye Disorders</b>         |               |                    |               |                    |
| Age group                                                                               | Unmatched     |                    | Matched       |                    |
|                                                                                         | Sulfonylureas | Thiazolidinediones | Sulfonylureas | Thiazolidinediones |

|       |     |    |    |    |
|-------|-----|----|----|----|
| 25-29 | 4   | 1  | 1  | 1  |
| 30-34 | 24  | 4  | 2  | 4  |
| 35-39 | 47  | 11 | 10 | 10 |
| 40-44 | 96  | 24 | 22 | 21 |
| 45-49 | 150 | 45 | 29 | 38 |
| 50-54 | 261 | 70 | 56 | 65 |
| 55-59 | 334 | 72 | 53 | 61 |
| 60-64 | 348 | 80 | 80 | 75 |
| 65-69 | 403 | 84 | 81 | 72 |
| 70-74 | 306 | 48 | 45 | 43 |
| 75-79 | 228 | 48 | 47 | 44 |
| 80-84 | 132 | 33 | 29 | 32 |
| 85-89 | 63  | 6  | 14 | 4  |
| 90-94 | 14  | 3  | 1  | 2  |
| 95-99 | 3   | NA | 2  | NA |

**Comparison: DPP4 inhibitors vs Thiazolidinediones - Outcome: HbA1c**

| Age group | Unmatched       |                    | Matched         |                    |
|-----------|-----------------|--------------------|-----------------|--------------------|
|           | DPP4 inhibitors | Thiazolidinediones | DPP4 inhibitors | Thiazolidinediones |
| 25-29     | 5               | 3                  | NA              | 1                  |
| 30-34     | 10              | 7                  | 2               | 2                  |
| 35-39     | 16              | 14                 | 8               | 7                  |
| 40-44     | 56              | 34                 | 18              | 17                 |
| 45-49     | 82              | 61                 | 33              | 34                 |
| 50-54     | 172             | 97                 | 55              | 65                 |
| 55-59     | 253             | 129                | 70              | 72                 |
| 60-64     | 275             | 109                | 83              | 74                 |
| 65-69     | 245             | 129                | 73              | 76                 |
| 70-74     | 213             | 73                 | 50              | 51                 |
| 75-79     | 154             | 60                 | 48              | 41                 |
| 80-84     | 91              | 43                 | 22              | 26                 |
| 85-89     | 26              | 10                 | 11              | 6                  |
| 90-94     | 7               | 5                  | 2               | 3                  |

**Comparison: DPP4 inhibitors vs Thiazolidinediones - Outcome: Myocardial Infarction**

| Age group | Unmatched       |                    | Matched         |                    |
|-----------|-----------------|--------------------|-----------------|--------------------|
|           | DPP4 inhibitors | Thiazolidinediones | DPP4 inhibitors | Thiazolidinediones |
| 25-29     | 5               | 3                  | 1               | 3                  |
| 30-34     | 10              | 7                  | 2               | 4                  |
| 35-39     | 16              | 14                 | 8               | 10                 |
| 40-44     | 56              | 34                 | 19              | 22                 |
| 45-49     | 82              | 61                 | 38              | 40                 |
| 50-54     | 172             | 97                 | 72              | 72                 |
| 55-59     | 253             | 129                | 79              | 84                 |

|                                                                                      |                 |                    |                 |                    |
|--------------------------------------------------------------------------------------|-----------------|--------------------|-----------------|--------------------|
| 60-64                                                                                | 275             | 109                | 95              | 85                 |
| 65-69                                                                                | 245             | 129                | 81              | 89                 |
| 70-74                                                                                | 213             | 73                 | 59              | 57                 |
| 75-79                                                                                | 154             | 60                 | 59              | 47                 |
| 80-84                                                                                | 91              | 43                 | 28              | 29                 |
| 85-89                                                                                | 26              | 10                 | 11              | 8                  |
| 90-94                                                                                | 7               | 5                  | 2               | 4                  |
| <b>Comparison: DPP4 inhibitors vs Thiazolidinediones - Outcome: Kidney Disorders</b> |                 |                    |                 |                    |
| Age group                                                                            | Unmatched       |                    | Matched         |                    |
|                                                                                      | DPP4 inhibitors | Thiazolidinediones | DPP4 inhibitors | Thiazolidinediones |
| 25-29                                                                                | 5               | 3                  | 1               | 3                  |
| 30-34                                                                                | 10              | 7                  | 2               | 4                  |
| 35-39                                                                                | 16              | 14                 | 7               | 10                 |
| 40-44                                                                                | 56              | 34                 | 19              | 22                 |
| 45-49                                                                                | 82              | 61                 | 36              | 40                 |
| 50-54                                                                                | 172             | 97                 | 71              | 72                 |
| 55-59                                                                                | 253             | 129                | 79              | 78                 |
| 60-64                                                                                | 275             | 109                | 94              | 81                 |
| 65-69                                                                                | 245             | 129                | 81              | 88                 |
| 70-74                                                                                | 213             | 73                 | 59              | 54                 |
| 75-79                                                                                | 154             | 60                 | 52              | 46                 |
| 80-84                                                                                | 91              | 43                 | 26              | 29                 |
| 85-89                                                                                | 26              | 10                 | 9               | 7                  |
| 90-94                                                                                | 7               | 5                  | 2               | 4                  |
| <b>Comparison: DPP4 inhibitors vs Thiazolidinediones - Outcome: Eye Disorders</b>    |                 |                    |                 |                    |
| Age group                                                                            | Unmatched       |                    | Matched         |                    |
|                                                                                      | DPP4 inhibitors | Thiazolidinediones | DPP4 inhibitors | Thiazolidinediones |
| 25-29                                                                                | 5               | 3                  | 1               | 2                  |
| 30-34                                                                                | 10              | 7                  | 2               | 4                  |
| 35-39                                                                                | 16              | 14                 | 8               | 10                 |
| 40-44                                                                                | 56              | 34                 | 17              | 19                 |
| 45-49                                                                                | 82              | 61                 | 39              | 37                 |
| 50-54                                                                                | 172             | 97                 | 67              | 73                 |
| 55-59                                                                                | 253             | 129                | 76              | 79                 |
| 60-64                                                                                | 275             | 109                | 93              | 82                 |
| 65-69                                                                                | 245             | 129                | 76              | 84                 |
| 70-74                                                                                | 213             | 73                 | 58              | 53                 |
| 75-79                                                                                | 154             | 60                 | 53              | 47                 |
| 80-84                                                                                | 91              | 43                 | 26              | 29                 |
| 85-89                                                                                | 26              | 10                 | 12              | 7                  |
| 90-94                                                                                | 7               | 5                  | 1               | 3                  |



**eTable 12.** Age Information Before and After Matching for Each Drug Comparison Based on the Data From Optum Clinformatics Data Mart

| <b>Comparison: Sulfonylureas vs DPP4 inhibitors - Outcome: HbA1c</b>                 |               |                 |               |                 |
|--------------------------------------------------------------------------------------|---------------|-----------------|---------------|-----------------|
| Age group                                                                            | Unmatched     |                 | Matched       |                 |
|                                                                                      | Sulfonylureas | DPP4 inhibitors | Sulfonylureas | DPP4 inhibitors |
| 5-9                                                                                  | NA            | 1               | NA            | NA              |
| 10-14                                                                                | 3             | 3               | 1             | 1               |
| 15-19                                                                                | 35            | 10              | 6             | 9               |
| 20-24                                                                                | 145           | 39              | 31            | 34              |
| 25-29                                                                                | 632           | 162             | 120           | 134             |
| 30-34                                                                                | 1713          | 441             | 333           | 332             |
| 35-39                                                                                | 3265          | 1131            | 847           | 851             |
| 40-44                                                                                | 5634          | 2144            | 1570          | 1535            |
| 45-49                                                                                | 8604          | 3367            | 2424          | 2385            |
| 50-54                                                                                | 11197         | 4641            | 3278          | 3195            |
| 55-59                                                                                | 12182         | 5291            | 3479          | 3489            |
| 60-64                                                                                | 10776         | 4878            | 3235          | 3098            |
| 65-69                                                                                | 15806         | 5704            | 3990          | 4138            |
| 70-74                                                                                | 9649          | 4053            | 2710          | 2765            |
| 75-79                                                                                | 6003          | 2353            | 1511          | 1574            |
| 80-84                                                                                | 2815          | 1433            | 957           | 954             |
| 85-89                                                                                | 692           | 469             | 285           | 283             |
| <b>Comparison: Sulfonylureas vs DPP4 inhibitors - Outcome: Myocardial Infarction</b> |               |                 |               |                 |
| Age group                                                                            | Unmatched     |                 | Matched       |                 |
|                                                                                      | Sulfonylureas | DPP4 inhibitors | Sulfonylureas | DPP4 inhibitors |
| 5-9                                                                                  | NA            | 1               | NA            | 1               |
| 10-14                                                                                | 3             | 3               | 1             | 3               |
| 15-19                                                                                | 35            | 10              | 8             | 10              |
| 20-24                                                                                | 145           | 39              | 38            | 39              |
| 25-29                                                                                | 632           | 162             | 153           | 160             |
| 30-34                                                                                | 1713          | 441             | 411           | 437             |
| 35-39                                                                                | 3265          | 1131            | 1063          | 1103            |
| 40-44                                                                                | 5634          | 2144            | 2026          | 2077            |
| 45-49                                                                                | 8604          | 3367            | 3220          | 3255            |
| 50-54                                                                                | 11197         | 4641            | 4380          | 4421            |
| 55-59                                                                                | 12182         | 5291            | 4899          | 4975            |
| 60-64                                                                                | 10776         | 4878            | 4702          | 4553            |
| 65-69                                                                                | 15806         | 5704            | 5484          | 5489            |
| 70-74                                                                                | 9649          | 4053            | 3909          | 3842            |
| 75-79                                                                                | 6003          | 2353            | 2189          | 2197            |
| 80-84                                                                                | 2815          | 1433            | 1381          | 1318            |
| 85-89                                                                                | 692           | 469             | 439           | 423             |
| <b>Comparison: Sulfonylureas vs DPP4 inhibitors - Outcome: Kidney Disorders</b>      |               |                 |               |                 |
| Age group                                                                            | Unmatched     |                 | Matched       |                 |
|                                                                                      | Sulfonylureas | DPP4 inhibitors | Sulfonylureas | DPP4 inhibitors |

|                                                                              |               |                    |               |                    |
|------------------------------------------------------------------------------|---------------|--------------------|---------------|--------------------|
| 5-9                                                                          | NA            | 1                  | NA            | 1                  |
| 10-14                                                                        | 3             | 3                  | 1             | 3                  |
| 15-19                                                                        | 35            | 10                 | 8             | 9                  |
| 20-24                                                                        | 145           | 39                 | 36            | 37                 |
| 25-29                                                                        | 632           | 162                | 139           | 150                |
| 30-34                                                                        | 1713          | 441                | 393           | 408                |
| 35-39                                                                        | 3265          | 1131               | 998           | 1016               |
| 40-44                                                                        | 5634          | 2144               | 1870          | 1883               |
| 45-49                                                                        | 8604          | 3367               | 2858          | 2934               |
| 50-54                                                                        | 11197         | 4641               | 3884          | 3894               |
| 55-59                                                                        | 12182         | 5291               | 4305          | 4365               |
| 60-64                                                                        | 10776         | 4878               | 4021          | 3963               |
| 65-69                                                                        | 15806         | 5704               | 4608          | 4574               |
| 70-74                                                                        | 9649          | 4053               | 3024          | 3067               |
| 75-79                                                                        | 6003          | 2353               | 1648          | 1602               |
| 80-84                                                                        | 2815          | 1433               | 974           | 902                |
| 85-89                                                                        | 692           | 469                | 293           | 252                |
| <b>Comparison: Sulfonylureas vs DPP4 inhibitors - Outcome: Eye Disorders</b> |               |                    |               |                    |
| Age group                                                                    | Unmatched     |                    | Matched       |                    |
|                                                                              | Sulfonylureas | DPP4 inhibitors    | Sulfonylureas | DPP4 inhibitors    |
| 5-9                                                                          | NA            | 1                  | NA            | 1                  |
| 10-14                                                                        | 3             | 3                  | 1             | 3                  |
| 15-19                                                                        | 35            | 10                 | 10            | 10                 |
| 20-24                                                                        | 145           | 39                 | 31            | 39                 |
| 25-29                                                                        | 632           | 162                | 146           | 153                |
| 30-34                                                                        | 1713          | 441                | 368           | 404                |
| 35-39                                                                        | 3265          | 1131               | 1005          | 1045               |
| 40-44                                                                        | 5634          | 2144               | 1867          | 1904               |
| 45-49                                                                        | 8604          | 3367               | 2848          | 2890               |
| 50-54                                                                        | 11197         | 4641               | 3783          | 3770               |
| 55-59                                                                        | 12182         | 5291               | 4014          | 4035               |
| 60-64                                                                        | 10776         | 4878               | 3587          | 3399               |
| 65-69                                                                        | 15806         | 5704               | 3880          | 3924               |
| 70-74                                                                        | 9649          | 4053               | 2440          | 2448               |
| 75-79                                                                        | 6003          | 2353               | 1351          | 1367               |
| 80-84                                                                        | 2815          | 1433               | 836           | 788                |
| 85-89                                                                        | 692           | 469                | 293           | 280                |
| <b>Comparison: Sulfonylureas vs Thiazolidinediones - Outcome: HbA1c</b>      |               |                    |               |                    |
| Age group                                                                    | Unmatched     |                    | Matched       |                    |
|                                                                              | Sulfonylureas | Thiazolidinediones | Sulfonylureas | Thiazolidinediones |
| 5-9                                                                          | NA            | 1                  | NA            | 1                  |
| 10-14                                                                        | 2             | 1                  | NA            | 1                  |
| 15-19                                                                        | 35            | 12                 | 15            | 10                 |
| 20-24                                                                        | 141           | 37                 | 42            | 30                 |
| 25-29                                                                        | 610           | 246                | 195           | 214                |

|       |       |      |      |      |
|-------|-------|------|------|------|
| 30-34 | 1668  | 605  | 542  | 504  |
| 35-39 | 3191  | 1320 | 1133 | 1078 |
| 40-44 | 5505  | 2320 | 1906 | 1867 |
| 45-49 | 8432  | 3491 | 2827 | 2721 |
| 50-54 | 11135 | 4554 | 3591 | 3497 |
| 55-59 | 12119 | 4906 | 3758 | 3637 |
| 60-64 | 10845 | 3780 | 2795 | 2756 |
| 65-69 | 16398 | 3767 | 2706 | 2990 |
| 70-74 | 9882  | 2355 | 1673 | 1830 |
| 75-79 | 6044  | 1554 | 1171 | 1212 |
| 80-84 | 2989  | 740  | 513  | 529  |
| 85-89 | 763   | 122  | 86   | 76   |

**Comparison: Sulfonylureas vs Thiazolidinediones - Outcome: Myocardial Infarction**

| Age group | Unmatched     |                    | Matched       |                    |
|-----------|---------------|--------------------|---------------|--------------------|
|           | Sulfonylureas | Thiazolidinediones | Sulfonylureas | Thiazolidinediones |
| 5-9       | NA            | 1                  | NA            | 1                  |
| 10-14     | 2             | 1                  | 1             | 1                  |
| 15-19     | 35            | 12                 | 16            | 12                 |
| 20-24     | 141           | 37                 | 52            | 37                 |
| 25-29     | 610           | 246                | 224           | 242                |
| 30-34     | 1668          | 605                | 631           | 594                |
| 35-39     | 3191          | 1320               | 1346          | 1278               |
| 40-44     | 5505          | 2320               | 2267          | 2224               |
| 45-49     | 8432          | 3491               | 3402          | 3318               |
| 50-54     | 11135         | 4554               | 4374          | 4303               |
| 55-59     | 12119         | 4906               | 4717          | 4625               |
| 60-64     | 10845         | 3780               | 3704          | 3597               |
| 65-69     | 16398         | 3767               | 3396          | 3680               |
| 70-74     | 9882          | 2355               | 2185          | 2295               |
| 75-79     | 6044          | 1554               | 1448          | 1502               |
| 80-84     | 2989          | 740                | 670           | 721                |
| 85-89     | 763           | 122                | 116           | 119                |

**Comparison: Sulfonylureas vs Thiazolidinediones - Outcome: Kidney Disorders**

| Age group | Unmatched     |                    | Matched       |                    |
|-----------|---------------|--------------------|---------------|--------------------|
|           | Sulfonylureas | Thiazolidinediones | Sulfonylureas | Thiazolidinediones |
| 5-9       | NA            | 1                  | NA            | 1                  |
| 10-14     | 2             | 1                  | 1             | 1                  |
| 15-19     | 35            | 12                 | 14            | 11                 |
| 20-24     | 141           | 37                 | 52            | 35                 |
| 25-29     | 610           | 246                | 205           | 236                |
| 30-34     | 1668          | 605                | 602           | 570                |
| 35-39     | 3191          | 1320               | 1267          | 1209               |
| 40-44     | 5505          | 2320               | 2164          | 2087               |
| 45-49     | 8432          | 3491               | 3199          | 3106               |
| 50-54     | 11135         | 4554               | 4059          | 4003               |

|                                                                                 |                 |                    |                 |                    |
|---------------------------------------------------------------------------------|-----------------|--------------------|-----------------|--------------------|
| 55-59                                                                           | 12119           | 4906               | 4307            | 4257               |
| 60-64                                                                           | 10845           | 3780               | 3299            | 3244               |
| 65-69                                                                           | 16398           | 3767               | 2984            | 3241               |
| 70-74                                                                           | 9882            | 2355               | 1807            | 1944               |
| 75-79                                                                           | 6044            | 1554               | 1211            | 1229               |
| 80-84                                                                           | 2989            | 740                | 512             | 534                |
| 85-89                                                                           | 763             | 122                | 92              | 67                 |
| <b>Comparison: Sulfonylureas vs Thiazolidinediones - Outcome: Eye Disorders</b> |                 |                    |                 |                    |
| Age group                                                                       | Unmatched       |                    | Matched         |                    |
|                                                                                 | Sulfonylureas   | Thiazolidinediones | Sulfonylureas   | Thiazolidinediones |
| 5-9                                                                             | NA              | 1                  | NA              | 1                  |
| 10-14                                                                           | 2               | 1                  | 1               | 1                  |
| 15-19                                                                           | 35              | 12                 | 16              | 11                 |
| 20-24                                                                           | 141             | 37                 | 50              | 37                 |
| 25-29                                                                           | 610             | 246                | 217             | 236                |
| 30-34                                                                           | 1668            | 605                | 597             | 568                |
| 35-39                                                                           | 3191            | 1320               | 1298            | 1214               |
| 40-44                                                                           | 5505            | 2320               | 2116            | 2089               |
| 45-49                                                                           | 8432            | 3491               | 3119            | 3046               |
| 50-54                                                                           | 11135           | 4554               | 3894            | 3786               |
| 55-59                                                                           | 12119           | 4906               | 4020            | 3911               |
| 60-64                                                                           | 10845           | 3780               | 2840            | 2844               |
| 65-69                                                                           | 16398           | 3767               | 2601            | 2797               |
| 70-74                                                                           | 9882            | 2355               | 1512            | 1625               |
| 75-79                                                                           | 6044            | 1554               | 968             | 1045               |
| 80-84                                                                           | 2989            | 740                | 445             | 490                |
| 85-89                                                                           | 763             | 122                | 79              | 72                 |
| <b>Comparison: DPP4 inhibitors vs Thiazolidinediones - Outcome: HbA1c</b>       |                 |                    |                 |                    |
| Age group                                                                       | Unmatched       |                    | Matched         |                    |
|                                                                                 | DPP4 inhibitors | Thiazolidinediones | DPP4 inhibitors | Thiazolidinediones |
| 5-9                                                                             | 1               | 1                  | NA              | NA                 |
| 10-14                                                                           | 3               | 1                  | 1               | NA                 |
| 15-19                                                                           | 11              | 14                 | 8               | 6                  |
| 20-24                                                                           | 46              | 53                 | 32              | 25                 |
| 25-29                                                                           | 196             | 303                | 118             | 123                |
| 30-34                                                                           | 529             | 748                | 308             | 304                |
| 35-39                                                                           | 1357            | 1641               | 688             | 707                |
| 40-44                                                                           | 2560            | 2904               | 1185            | 1242               |
| 45-49                                                                           | 4076            | 4388               | 1794            | 1719               |
| 50-54                                                                           | 5614            | 5612               | 2306            | 2274               |
| 55-59                                                                           | 6352            | 6002               | 2471            | 2419               |
| 60-64                                                                           | 5871            | 4653               | 2035            | 2067               |
| 65-69                                                                           | 7255            | 4837               | 2722            | 2738               |
| 70-74                                                                           | 4952            | 2913               | 1561            | 1622               |

| 75-79                                                                                     | 2771            | 1922               | 909             | 924                |
|-------------------------------------------------------------------------------------------|-----------------|--------------------|-----------------|--------------------|
| 80-84                                                                                     | 1697            | 821                | 518             | 509                |
| 85-89                                                                                     | 575             | 136                | 107             | 84                 |
| <b>Comparison: DPP4 inhibitors vs Thiazolidinediones - Outcome: Myocardial Infarction</b> |                 |                    |                 |                    |
| Age group                                                                                 | Unmatched       |                    | Matched         |                    |
|                                                                                           | DPP4 inhibitors | Thiazolidinediones | DPP4 inhibitors | Thiazolidinediones |
| 5-9                                                                                       | 1               | 1                  | 1               | NA                 |
| 10-14                                                                                     | 3               | 1                  | 3               | NA                 |
| 15-19                                                                                     | 11              | 14                 | 10              | 7                  |
| 20-24                                                                                     | 46              | 53                 | 34              | 33                 |
| 25-29                                                                                     | 196             | 303                | 142             | 146                |
| 30-34                                                                                     | 529             | 748                | 369             | 366                |
| 35-39                                                                                     | 1357            | 1641               | 873             | 857                |
| 40-44                                                                                     | 2560            | 2904               | 1534            | 1499               |
| 45-49                                                                                     | 4076            | 4388               | 2291            | 2215               |
| 50-54                                                                                     | 5614            | 5612               | 2942            | 2852               |
| 55-59                                                                                     | 6352            | 6002               | 3229            | 3133               |
| 60-64                                                                                     | 5871            | 4653               | 2764            | 2774               |
| 65-69                                                                                     | 7255            | 4837               | 3292            | 3452               |
| 70-74                                                                                     | 4952            | 2913               | 2018            | 2116               |
| 75-79                                                                                     | 2771            | 1922               | 1178            | 1222               |
| 80-84                                                                                     | 1697            | 821                | 682             | 700                |
| 85-89                                                                                     | 575             | 136                | 143             | 133                |
| <b>Comparison: DPP4 inhibitors vs Thiazolidinediones - Outcome: Kidney Disorders</b>      |                 |                    |                 |                    |
| Age group                                                                                 | Unmatched       |                    | Matched         |                    |
|                                                                                           | DPP4 inhibitors | Thiazolidinediones | DPP4 inhibitors | Thiazolidinediones |
| 5-9                                                                                       | 1               | 1                  | 1               | NA                 |
| 10-14                                                                                     | 3               | 1                  | 3               | NA                 |
| 15-19                                                                                     | 11              | 14                 | 10              | 6                  |
| 20-24                                                                                     | 46              | 53                 | 31              | 32                 |
| 25-29                                                                                     | 196             | 303                | 137             | 133                |
| 30-34                                                                                     | 529             | 748                | 347             | 352                |
| 35-39                                                                                     | 1357            | 1641               | 795             | 790                |
| 40-44                                                                                     | 2560            | 2904               | 1401            | 1379               |
| 45-49                                                                                     | 4076            | 4388               | 2111            | 2022               |
| 50-54                                                                                     | 5614            | 5612               | 2632            | 2606               |
| 55-59                                                                                     | 6352            | 6002               | 2911            | 2847               |
| 60-64                                                                                     | 5871            | 4653               | 2452            | 2451               |
| 65-69                                                                                     | 7255            | 4837               | 2922            | 3002               |
| 70-74                                                                                     | 4952            | 2913               | 1669            | 1757               |
| 75-79                                                                                     | 2771            | 1922               | 891             | 968                |
| 80-84                                                                                     | 1697            | 821                | 515             | 502                |

|                                                                                   |                 |                    |                 |                    |
|-----------------------------------------------------------------------------------|-----------------|--------------------|-----------------|--------------------|
| 85-89                                                                             | 575             | 136                | 99              | 80                 |
| <b>Comparison: DPP4 inhibitors vs Thiazolidinediones - Outcome: Eye Disorders</b> |                 |                    |                 |                    |
| Age group                                                                         | Unmatched       |                    | Matched         |                    |
|                                                                                   | DPP4 inhibitors | Thiazolidinediones | DPP4 inhibitors | Thiazolidinediones |
| 5-9                                                                               | 1               | 1                  | 1               | NA                 |
| 10-14                                                                             | 3               | 1                  | 3               | NA                 |
| 15-19                                                                             | 11              | 14                 | 10              | 6                  |
| 20-24                                                                             | 46              | 53                 | 33              | 31                 |
| 25-29                                                                             | 196             | 303                | 134             | 133                |
| 30-34                                                                             | 529             | 748                | 349             | 336                |
| 35-39                                                                             | 1357            | 1641               | 829             | 795                |
| 40-44                                                                             | 2560            | 2904               | 1398            | 1391               |
| 45-49                                                                             | 4076            | 4388               | 2084            | 2012               |
| 50-54                                                                             | 5614            | 5612               | 2560            | 2490               |
| 55-59                                                                             | 6352            | 6002               | 2704            | 2655               |
| 60-64                                                                             | 5871            | 4653               | 2115            | 2181               |
| 65-69                                                                             | 7255            | 4837               | 2511            | 2612               |
| 70-74                                                                             | 4952            | 2913               | 1396            | 1465               |
| 75-79                                                                             | 2771            | 1922               | 796             | 804                |
| 80-84                                                                             | 1697            | 821                | 439             | 472                |
| 85-89                                                                             | 575             | 136                | 108             | 87                 |

**eTable 13.** Age Information Before and After Matching for Each Drug Comparison Based on the Data From Ajou University, South Korea

| <b>Comparison: Sulfonylureas vs DPP4 inhibitors - Outcome: HbA1c</b>                 |               |                 |               |                 |
|--------------------------------------------------------------------------------------|---------------|-----------------|---------------|-----------------|
| Age group                                                                            | Unmatched     |                 | Matched       |                 |
|                                                                                      | Sulfonylureas | DPP4 inhibitors | Sulfonylureas | DPP4 inhibitors |
| 15-19                                                                                | 6             | 4               | 2             | 4               |
| 20-24                                                                                | 8             | 2               | 6             | 2               |
| 25-29                                                                                | 22            | 4               | 7             | 3               |
| 30-34                                                                                | 38            | 12              | 11            | 10              |
| 35-39                                                                                | 88            | 43              | 43            | 35              |
| 40-44                                                                                | 130           | 72              | 43            | 47              |
| 45-49                                                                                | 198           | 100             | 56            | 63              |
| 50-54                                                                                | 204           | 148             | 88            | 95              |
| 55-59                                                                                | 190           | 138             | 79            | 80              |
| 60-64                                                                                | 180           | 126             | 67            | 75              |
| 65-69                                                                                | 146           | 111             | 64            | 64              |
| 70-74                                                                                | 140           | 106             | 63            | 60              |
| 75-79                                                                                | 61            | 50              | 31            | 23              |
| 80-84                                                                                | 23            | 23              | 13            | 13              |
| 85-89                                                                                | 8             | 5               | 3             | 2               |
| <b>Comparison: Sulfonylureas vs DPP4 inhibitors - Outcome: Myocardial Infarction</b> |               |                 |               |                 |
| Age group                                                                            | Unmatched     |                 | Matched       |                 |
|                                                                                      | Sulfonylureas | DPP4 inhibitors | Sulfonylureas | DPP4 inhibitors |
| 15-19                                                                                | 6             | 4               | 2             | 4               |
| 20-24                                                                                | 8             | 2               | 5             | 2               |
| 25-29                                                                                | 22            | 4               | 7             | 3               |
| 30-34                                                                                | 38            | 12              | 13            | 9               |
| 35-39                                                                                | 88            | 43              | 40            | 35              |
| 40-44                                                                                | 130           | 72              | 47            | 50              |
| 45-49                                                                                | 198           | 100             | 60            | 67              |
| 50-54                                                                                | 204           | 148             | 90            | 97              |
| 55-59                                                                                | 190           | 138             | 79            | 81              |
| 60-64                                                                                | 180           | 126             | 69            | 79              |
| 65-69                                                                                | 146           | 111             | 70            | 65              |
| 70-74                                                                                | 140           | 106             | 68            | 64              |
| 75-79                                                                                | 61            | 50              | 31            | 28              |
| 80-84                                                                                | 23            | 23              | 14            | 13              |
| 85-89                                                                                | 8             | 5               | 4             | 2               |
| <b>Comparison: Sulfonylureas vs DPP4 inhibitors - Outcome: Kidney Disorders</b>      |               |                 |               |                 |
| Age group                                                                            | Unmatched     |                 | Matched       |                 |
|                                                                                      | Sulfonylureas | DPP4 inhibitors | Sulfonylureas | DPP4 inhibitors |
| 15-19                                                                                | 6             | 4               | 2             | 4               |
| 20-24                                                                                | 8             | 2               | 5             | 2               |
| 25-29                                                                                | 22            | 4               | 7             | 3               |
| 30-34                                                                                | 38            | 12              | 10            | 10              |

|       |     |     |    |    |
|-------|-----|-----|----|----|
| 35-39 | 88  | 43  | 40 | 33 |
| 40-44 | 130 | 72  | 48 | 51 |
| 45-49 | 198 | 100 | 61 | 67 |
| 50-54 | 204 | 148 | 90 | 97 |
| 55-59 | 190 | 138 | 78 | 81 |
| 60-64 | 180 | 126 | 67 | 77 |
| 65-69 | 146 | 111 | 68 | 65 |
| 70-74 | 140 | 106 | 72 | 62 |
| 75-79 | 61  | 50  | 29 | 27 |
| 80-84 | 23  | 23  | 14 | 13 |
| 85-89 | 8   | 5   | 3  | 2  |

**Comparison: Sulfonylureas vs DPP4 inhibitors - Outcome: Eye Disorders**

| Age group | Unmatched     |                 | Matched       |                 |
|-----------|---------------|-----------------|---------------|-----------------|
|           | Sulfonylureas | DPP4 inhibitors | Sulfonylureas | DPP4 inhibitors |
| 15-19     | 6             | 4               | 2             | 4               |
| 20-24     | 8             | 2               | 5             | 2               |
| 25-29     | 22            | 4               | 7             | 3               |
| 30-34     | 38            | 12              | 12            | 10              |
| 35-39     | 88            | 43              | 40            | 35              |
| 40-44     | 130           | 72              | 46            | 51              |
| 45-49     | 198           | 100             | 63            | 65              |
| 50-54     | 204           | 148             | 87            | 98              |
| 55-59     | 190           | 138             | 80            | 81              |
| 60-64     | 180           | 126             | 69            | 77              |
| 65-69     | 146           | 111             | 70            | 66              |
| 70-74     | 140           | 106             | 71            | 63              |
| 75-79     | 61            | 50              | 30            | 28              |
| 80-84     | 23            | 23              | 14            | 14              |
| 85-89     | 8             | 5               | 3             | 2               |

**Comparison: Sulfonylureas vs Thiazolidinediones - Outcome: HbA1c**

| Age group | Unmatched     |                    | Matched       |                    |
|-----------|---------------|--------------------|---------------|--------------------|
|           | Sulfonylureas | Thiazolidinediones | Sulfonylureas | Thiazolidinediones |
| 15-19     | 7             | 1                  | NA            | 1                  |
| 20-24     | 10            | 2                  | NA            | 2                  |
| 25-29     | 26            | 1                  | NA            | 1                  |
| 30-34     | 53            | 3                  | 4             | 3                  |
| 35-39     | 97            | 9                  | 6             | 8                  |
| 40-44     | 154           | 22                 | 15            | 20                 |
| 45-49     | 236           | 24                 | 26            | 21                 |
| 50-54     | 255           | 32                 | 26            | 30                 |
| 55-59     | 232           | 28                 | 27            | 23                 |
| 60-64     | 212           | 32                 | 24            | 27                 |
| 65-69     | 176           | 24                 | 24            | 20                 |
| 70-74     | 171           | 14                 | 10            | 12                 |
| 75-79     | 72            | 6                  | 8             | 5                  |



| 80-84                                                                                   | 24            | 2                  | 3             | 2                  |
|-----------------------------------------------------------------------------------------|---------------|--------------------|---------------|--------------------|
| 85-89                                                                                   | 8             | NA                 | 2             | NA                 |
| 90-94                                                                                   | 1             | NA                 | NA            | NA                 |
| <b>Comparison: Sulfonylureas vs Thiazolidinediones - Outcome: Myocardial Infarction</b> |               |                    |               |                    |
| Age group                                                                               | Unmatched     |                    | Matched       |                    |
|                                                                                         | Sulfonylureas | Thiazolidinediones | Sulfonylureas | Thiazolidinediones |
| 15-19                                                                                   | 7             | 1                  | NA            | 1                  |
| 20-24                                                                                   | 10            | 2                  | NA            | 2                  |
| 25-29                                                                                   | 26            | 1                  | NA            | 1                  |
| 30-34                                                                                   | 53            | 3                  | 3             | 3                  |
| 35-39                                                                                   | 97            | 9                  | 8             | 8                  |
| 40-44                                                                                   | 154           | 22                 | 14            | 21                 |
| 45-49                                                                                   | 236           | 24                 | 28            | 22                 |
| 50-54                                                                                   | 255           | 32                 | 26            | 31                 |
| 55-59                                                                                   | 232           | 28                 | 27            | 23                 |
| 60-64                                                                                   | 212           | 32                 | 25            | 29                 |
| 65-69                                                                                   | 176           | 24                 | 23            | 22                 |
| 70-74                                                                                   | 171           | 14                 | 11            | 12                 |
| 75-79                                                                                   | 72            | 6                  | 10            | 4                  |
| 80-84                                                                                   | 24            | 2                  | 4             | 2                  |
| 85-89                                                                                   | 8             | NA                 | 2             | NA                 |
| 90-94                                                                                   | 1             | NA                 | NA            | NA                 |
| <b>Comparison: Sulfonylureas vs Thiazolidinediones - Outcome: Kidney Disorders</b>      |               |                    |               |                    |
| Age group                                                                               | Unmatched     |                    | Matched       |                    |
|                                                                                         | Sulfonylureas | Thiazolidinediones | Sulfonylureas | Thiazolidinediones |
| 15-19                                                                                   | 7             | 1                  | NA            | 1                  |
| 20-24                                                                                   | 10            | 2                  | 1             | 2                  |
| 25-29                                                                                   | 26            | 1                  | NA            | 1                  |
| 30-34                                                                                   | 53            | 3                  | 3             | 3                  |
| 35-39                                                                                   | 97            | 9                  | 6             | 8                  |
| 40-44                                                                                   | 154           | 22                 | 13            | 21                 |
| 45-49                                                                                   | 236           | 24                 | 24            | 22                 |
| 50-54                                                                                   | 255           | 32                 | 25            | 31                 |
| 55-59                                                                                   | 232           | 28                 | 33            | 24                 |
| 60-64                                                                                   | 212           | 32                 | 25            | 27                 |
| 65-69                                                                                   | 176           | 24                 | 23            | 21                 |
| 70-74                                                                                   | 171           | 14                 | 11            | 12                 |
| 75-79                                                                                   | 72            | 6                  | 9             | 5                  |
| 80-84                                                                                   | 24            | 2                  | 4             | 2                  |
| 85-89                                                                                   | 8             | NA                 | 2             | NA                 |
| 90-94                                                                                   | 1             | NA                 | 1             | NA                 |
| <b>Comparison: Sulfonylureas vs Thiazolidinediones - Outcome: Eye Disorders</b>         |               |                    |               |                    |
| Age group                                                                               | Unmatched     |                    | Matched       |                    |
|                                                                                         | Sulfonylureas | Thiazolidinediones | Sulfonylureas | Thiazolidinediones |
| 15-19                                                                                   | 7             | 1                  | NA            | 1                  |

|       |     |    |    |    |
|-------|-----|----|----|----|
| 20-24 | 10  | 2  | NA | 2  |
| 25-29 | 26  | 1  | 1  | 1  |
| 30-34 | 53  | 3  | 4  | 3  |
| 35-39 | 97  | 9  | 8  | 8  |
| 40-44 | 154 | 22 | 14 | 21 |
| 45-49 | 236 | 24 | 22 | 22 |
| 50-54 | 255 | 32 | 23 | 30 |
| 55-59 | 232 | 28 | 31 | 24 |
| 60-64 | 212 | 32 | 25 | 28 |
| 65-69 | 176 | 24 | 26 | 20 |
| 70-74 | 171 | 14 | 11 | 12 |
| 75-79 | 72  | 6  | 8  | 5  |
| 80-84 | 24  | 2  | 4  | 2  |
| 85-89 | 8   | NA | 2  | NA |
| 90-94 | 1   | NA | NA | NA |

**Comparison: DPP4 inhibitors vs Thiazolidinediones - Outcome: HbA1c**

| Age group | Unmatched       |                    | Matched         |                    |
|-----------|-----------------|--------------------|-----------------|--------------------|
|           | DPP4 inhibitors | Thiazolidinediones | DPP4 inhibitors | Thiazolidinediones |
| 15-19     | 5               | 1                  | 1               | 1                  |
| 20-24     | 4               | 2                  | 1               | 2                  |
| 25-29     | 8               | 1                  | 2               | 1                  |
| 30-34     | 28              | 5                  | 3               | 5                  |
| 35-39     | 57              | 15                 | 11              | 14                 |
| 40-44     | 90              | 22                 | 10              | 17                 |
| 45-49     | 149             | 29                 | 23              | 24                 |
| 50-54     | 207             | 38                 | 34              | 32                 |
| 55-59     | 185             | 35                 | 35              | 27                 |
| 60-64     | 160             | 37                 | 33              | 32                 |
| 65-69     | 144             | 25                 | 22              | 20                 |
| 70-74     | 140             | 18                 | 14              | 17                 |
| 75-79     | 69              | 11                 | 8               | 10                 |
| 80-84     | 26              | 3                  | 7               | 3                  |
| 85-89     | 5               | NA                 | 1               | NA                 |
| 90-94     | 3               | NA                 | NA              | NA                 |

**Comparison: DPP4 inhibitors vs Thiazolidinediones - Outcome: Myocardial Infarction**

| Age group | Unmatched       |                    | Matched         |                    |
|-----------|-----------------|--------------------|-----------------|--------------------|
|           | DPP4 inhibitors | Thiazolidinediones | DPP4 inhibitors | Thiazolidinediones |
| 15-19     | 5               | 1                  | 3               | 1                  |
| 20-24     | 4               | 2                  | 2               | 2                  |
| 25-29     | 8               | 1                  | 2               | 1                  |
| 30-34     | 28              | 5                  | 3               | 5                  |
| 35-39     | 57              | 15                 | 9               | 13                 |
| 40-44     | 90              | 22                 | 13              | 19                 |

|       |     |    |    |    |
|-------|-----|----|----|----|
| 45-49 | 149 | 29 | 19 | 25 |
| 50-54 | 207 | 38 | 33 | 34 |
| 55-59 | 185 | 35 | 36 | 28 |
| 60-64 | 160 | 37 | 35 | 33 |
| 65-69 | 144 | 25 | 24 | 20 |
| 70-74 | 140 | 18 | 15 | 17 |
| 75-79 | 69  | 11 | 8  | 10 |
| 80-84 | 26  | 3  | 7  | 3  |
| 85-89 | 5   | NA | 1  | NA |
| 90-94 | 3   | NA | 1  | NA |

**Comparison: DPP4 inhibitors vs Thiazolidinediones - Outcome: Kidney Disorders**

| Age group | Unmatched       |                    | Matched         |                    |
|-----------|-----------------|--------------------|-----------------|--------------------|
|           | DPP4 inhibitors | Thiazolidinediones | DPP4 inhibitors | Thiazolidinediones |
| 15-19     | 5               | 1                  | 1               | 1                  |
| 20-24     | 4               | 2                  | 1               | 2                  |
| 25-29     | 8               | 1                  | 2               | 1                  |
| 30-34     | 28              | 5                  | 3               | 5                  |
| 35-39     | 57              | 15                 | 11              | 14                 |
| 40-44     | 90              | 22                 | 10              | 19                 |
| 45-49     | 149             | 29                 | 21              | 25                 |
| 50-54     | 207             | 38                 | 31              | 33                 |
| 55-59     | 185             | 35                 | 39              | 27                 |
| 60-64     | 160             | 37                 | 36              | 32                 |
| 65-69     | 144             | 25                 | 26              | 19                 |
| 70-74     | 140             | 18                 | 13              | 17                 |
| 75-79     | 69              | 11                 | 7               | 10                 |
| 80-84     | 26              | 3                  | 5               | 3                  |
| 85-89     | 5               | NA                 | 1               | NA                 |
| 90-94     | 3               | NA                 | 1               | NA                 |

**Comparison: DPP4 inhibitors vs Thiazolidinediones - Outcome: Eye Disorders**

| Age group | Unmatched       |                    | Matched         |                    |
|-----------|-----------------|--------------------|-----------------|--------------------|
|           | DPP4 inhibitors | Thiazolidinediones | DPP4 inhibitors | Thiazolidinediones |
| 15-19     | 5               | 1                  | 3               | 1                  |
| 20-24     | 4               | 2                  | 1               | 2                  |
| 25-29     | 8               | 1                  | 3               | 1                  |
| 30-34     | 28              | 5                  | 3               | 5                  |
| 35-39     | 57              | 15                 | 11              | 14                 |
| 40-44     | 90              | 22                 | 13              | 19                 |
| 45-49     | 149             | 29                 | 21              | 25                 |
| 50-54     | 207             | 38                 | 34              | 35                 |
| 55-59     | 185             | 35                 | 35              | 28                 |
| 60-64     | 160             | 37                 | 30              | 31                 |
| 65-69     | 144             | 25                 | 25              | 19                 |

|       |     |    |    |    |
|-------|-----|----|----|----|
| 70-74 | 140 | 18 | 15 | 17 |
| 75-79 | 69  | 11 | 8  | 10 |
| 80-84 | 26  | 3  | 8  | 3  |
| 85-89 | 5   | NA | NA | NA |
| 90-94 | 3   | NA | NA | NA |

**eTable 14.** Age Information Before and After Matching for Each Drug Comparison Based on the Data From Stanford University

| <b>Comparison: Sulfonylureas vs DPP4 inhibitors - Outcome: HbA1c</b>                 |               |                 |               |                 |
|--------------------------------------------------------------------------------------|---------------|-----------------|---------------|-----------------|
| Age group                                                                            | Unmatched     |                 | Matched       |                 |
|                                                                                      | Sulfonylureas | DPP4 inhibitors | Sulfonylureas | DPP4 inhibitors |
| 15-19                                                                                | 1             | 1               | NA            | NA              |
| 20-24                                                                                | 4             | 1               | 2             | 1               |
| 25-29                                                                                | 10            | 2               | 2             | NA              |
| 30-34                                                                                | 16            | 3               | 4             | 3               |
| 35-39                                                                                | 39            | 10              | 4             | 9               |
| 40-44                                                                                | 45            | 8               | 10            | 5               |
| 45-49                                                                                | 54            | 14              | 5             | 7               |
| 50-54                                                                                | 84            | 19              | 10            | 10              |
| 55-59                                                                                | 111           | 21              | 14            | 17              |
| 60-64                                                                                | 113           | 22              | 10            | 10              |
| 65-69                                                                                | 114           | 24              | 18            | 13              |
| 70-74                                                                                | 77            | 18              | 7             | 10              |
| 75-79                                                                                | 60            | 10              | 5             | 3               |
| 80-84                                                                                | 39            | 10              | 2             | 5               |
| 85-89                                                                                | 14            | 6               | 3             | 4               |
| 90-94                                                                                | 10            | 1               | 2             | 1               |
| <b>Comparison: Sulfonylureas vs DPP4 inhibitors - Outcome: Myocardial Infarction</b> |               |                 |               |                 |
| Age group                                                                            | Unmatched     |                 | Matched       |                 |
|                                                                                      | Sulfonylureas | DPP4 inhibitors | Sulfonylureas | DPP4 inhibitors |
| 15-19                                                                                | 1             | 1               | NA            | 1               |
| 20-24                                                                                | 4             | 1               | NA            | 1               |
| 25-29                                                                                | 10            | 2               | 1             | 2               |
| 30-34                                                                                | 16            | 3               | 6             | 3               |
| 35-39                                                                                | 39            | 10              | 9             | 10              |
| 40-44                                                                                | 45            | 8               | 11            | 8               |
| 45-49                                                                                | 54            | 14              | 15            | 13              |
| 50-54                                                                                | 84            | 19              | 16            | 19              |
| 55-59                                                                                | 111           | 21              | 24            | 21              |
| 60-64                                                                                | 113           | 22              | 16            | 22              |
| 65-69                                                                                | 114           | 24              | 28            | 24              |
| 70-74                                                                                | 77            | 18              | 14            | 16              |
| 75-79                                                                                | 60            | 10              | 13            | 10              |
| 80-84                                                                                | 39            | 10              | 10            | 10              |
| 85-89                                                                                | 14            | 6               | 4             | 6               |
| 90-94                                                                                | 10            | 1               | NA            | 1               |
| <b>Comparison: Sulfonylureas vs DPP4 inhibitors - Outcome: Kidney Disorders</b>      |               |                 |               |                 |
| Age group                                                                            | Unmatched     |                 | Matched       |                 |
|                                                                                      | Sulfonylureas | DPP4 inhibitors | Sulfonylureas | DPP4 inhibitors |
| 15-19                                                                                | 1             | 1               | NA            | 1               |
| 20-24                                                                                | 4             | 1               | 1             | 1               |

|                                                                              |               |                    |               |                    |
|------------------------------------------------------------------------------|---------------|--------------------|---------------|--------------------|
| 25-29                                                                        | 10            | 2                  | NA            | 1                  |
| 30-34                                                                        | 16            | 3                  | 3             | 3                  |
| 35-39                                                                        | 39            | 10                 | 10            | 9                  |
| 40-44                                                                        | 45            | 8                  | 9             | 7                  |
| 45-49                                                                        | 54            | 14                 | 9             | 12                 |
| 50-54                                                                        | 84            | 19                 | 18            | 18                 |
| 55-59                                                                        | 111           | 21                 | 26            | 20                 |
| 60-64                                                                        | 113           | 22                 | 13            | 18                 |
| 65-69                                                                        | 114           | 24                 | 19            | 23                 |
| 70-74                                                                        | 77            | 18                 | 19            | 15                 |
| 75-79                                                                        | 60            | 10                 | 9             | 6                  |
| 80-84                                                                        | 39            | 10                 | 8             | 7                  |
| 85-89                                                                        | 14            | 6                  | 3             | 5                  |
| 90-94                                                                        | 10            | 1                  | NA            | 1                  |
| <b>Comparison: Sulfonylureas vs DPP4 inhibitors - Outcome: Eye Disorders</b> |               |                    |               |                    |
| Age group                                                                    | Unmatched     |                    | Matched       |                    |
|                                                                              | Sulfonylureas | DPP4 inhibitors    | Sulfonylureas | DPP4 inhibitors    |
| 15-19                                                                        | 1             | 1                  | NA            | 1                  |
| 20-24                                                                        | 4             | 1                  | 2             | 1                  |
| 25-29                                                                        | 10            | 2                  | 3             | 1                  |
| 30-34                                                                        | 16            | 3                  | 4             | 3                  |
| 35-39                                                                        | 39            | 10                 | 11            | 10                 |
| 40-44                                                                        | 45            | 8                  | 14            | 7                  |
| 45-49                                                                        | 54            | 14                 | 10            | 11                 |
| 50-54                                                                        | 84            | 19                 | 12            | 16                 |
| 55-59                                                                        | 111           | 21                 | 20            | 20                 |
| 60-64                                                                        | 113           | 22                 | 11            | 16                 |
| 65-69                                                                        | 114           | 24                 | 20            | 19                 |
| 70-74                                                                        | 77            | 18                 | 15            | 13                 |
| 75-79                                                                        | 60            | 10                 | 8             | 6                  |
| 80-84                                                                        | 39            | 10                 | 3             | 6                  |
| 85-89                                                                        | 14            | 6                  | 1             | 4                  |
| 90-94                                                                        | 10            | 1                  | 1             | 1                  |
| <b>Comparison: Sulfonylureas vs Thiazolidinediones - Outcome: HbA1c</b>      |               |                    |               |                    |
| Age group                                                                    | Unmatched     |                    | Matched       |                    |
|                                                                              | Sulfonylureas | Thiazolidinediones | Sulfonylureas | Thiazolidinediones |
| 15-19                                                                        | 1             | NA                 | NA            | NA                 |
| 20-24                                                                        | 4             | NA                 | NA            | NA                 |
| 25-29                                                                        | 10            | 1                  | 1             | 1                  |
| 30-34                                                                        | 18            | NA                 | 2             | NA                 |
| 35-39                                                                        | 37            | 3                  | 4             | 3                  |
| 40-44                                                                        | 43            | 6                  | 1             | 4                  |
| 45-49                                                                        | 57            | 14                 | 4             | 9                  |
| 50-54                                                                        | 88            | 21                 | 10            | 12                 |
| 55-59                                                                        | 107           | 22                 | 13            | 12                 |

|                                                                                         |               |                    |               |                    |
|-----------------------------------------------------------------------------------------|---------------|--------------------|---------------|--------------------|
| 60-64                                                                                   | 98            | 15                 | 11            | 9                  |
| 65-69                                                                                   | 113           | 26                 | 14            | 14                 |
| 70-74                                                                                   | 81            | 10                 | 4             | 6                  |
| 75-79                                                                                   | 57            | 5                  | 5             | 1                  |
| 80-84                                                                                   | 36            | 10                 | 4             | 6                  |
| 85-89                                                                                   | 15            | 1                  | 1             | 1                  |
| 90-94                                                                                   | 10            | 1                  | 4             | NA                 |
| <b>Comparison: Sulfonylureas vs Thiazolidinediones - Outcome: Myocardial Infarction</b> |               |                    |               |                    |
| Age group                                                                               | Unmatched     |                    | Matched       |                    |
|                                                                                         | Sulfonylureas | Thiazolidinediones | Sulfonylureas | Thiazolidinediones |
| 15-19                                                                                   | 1             | NA                 | NA            | NA                 |
| 20-24                                                                                   | 4             | NA                 | 1             | NA                 |
| 25-29                                                                                   | 10            | 1                  | NA            | 1                  |
| 30-34                                                                                   | 18            | NA                 | 3             | NA                 |
| 35-39                                                                                   | 37            | 3                  | 7             | 3                  |
| 40-44                                                                                   | 43            | 6                  | 3             | 6                  |
| 45-49                                                                                   | 57            | 14                 | 9             | 14                 |
| 50-54                                                                                   | 88            | 21                 | 17            | 21                 |
| 55-59                                                                                   | 107           | 22                 | 18            | 22                 |
| 60-64                                                                                   | 98            | 15                 | 19            | 15                 |
| 65-69                                                                                   | 113           | 26                 | 24            | 26                 |
| 70-74                                                                                   | 81            | 10                 | 11            | 10                 |
| 75-79                                                                                   | 57            | 5                  | 7             | 5                  |
| 80-84                                                                                   | 36            | 10                 | 8             | 9                  |
| 85-89                                                                                   | 15            | 1                  | 3             | 1                  |
| 90-94                                                                                   | 10            | 1                  | 4             | 1                  |
| <b>Comparison: Sulfonylureas vs Thiazolidinediones - Outcome: Kidney Disorders</b>      |               |                    |               |                    |
| Age group                                                                               | Unmatched     |                    | Matched       |                    |
|                                                                                         | Sulfonylureas | Thiazolidinediones | Sulfonylureas | Thiazolidinediones |
| 15-19                                                                                   | 1             | NA                 | 1             | NA                 |
| 20-24                                                                                   | 4             | NA                 | NA            | NA                 |
| 25-29                                                                                   | 10            | 1                  | NA            | 1                  |
| 30-34                                                                                   | 18            | NA                 | 1             | NA                 |
| 35-39                                                                                   | 37            | 3                  | 12            | 3                  |
| 40-44                                                                                   | 43            | 6                  | 4             | 5                  |
| 45-49                                                                                   | 57            | 14                 | 7             | 13                 |
| 50-54                                                                                   | 88            | 21                 | 15            | 21                 |
| 55-59                                                                                   | 107           | 22                 | 16            | 21                 |
| 60-64                                                                                   | 98            | 15                 | 18            | 14                 |
| 65-69                                                                                   | 113           | 26                 | 23            | 23                 |
| 70-74                                                                                   | 81            | 10                 | 11            | 9                  |
| 75-79                                                                                   | 57            | 5                  | 10            | 4                  |
| 80-84                                                                                   | 36            | 10                 | 7             | 10                 |
| 85-89                                                                                   | 15            | 1                  | 1             | 1                  |
| 90-94                                                                                   | 10            | 1                  | NA            | 1                  |

| <b>Comparison: Sulfonylureas vs Thiazolidinediones - Outcome: Eye Disorders</b>           |                 |                    |                 |                    |
|-------------------------------------------------------------------------------------------|-----------------|--------------------|-----------------|--------------------|
| Age group                                                                                 | Unmatched       |                    | Matched         |                    |
|                                                                                           | Sulfonylureas   | Thiazolidinediones | Sulfonylureas   | Thiazolidinediones |
| 15-19                                                                                     | 1               | NA                 | NA              | NA                 |
| 20-24                                                                                     | 4               | NA                 | NA              | NA                 |
| 25-29                                                                                     | 10              | 1                  | NA              | 1                  |
| 30-34                                                                                     | 18              | NA                 | 3               | NA                 |
| 35-39                                                                                     | 37              | 3                  | 4               | 3                  |
| 40-44                                                                                     | 43              | 6                  | 6               | 6                  |
| 45-49                                                                                     | 57              | 14                 | 7               | 14                 |
| 50-54                                                                                     | 88              | 21                 | 13              | 19                 |
| 55-59                                                                                     | 107             | 22                 | 18              | 21                 |
| 60-64                                                                                     | 98              | 15                 | 18              | 13                 |
| 65-69                                                                                     | 113             | 26                 | 26              | 21                 |
| 70-74                                                                                     | 81              | 10                 | 6               | 7                  |
| 75-79                                                                                     | 57              | 5                  | 11              | 5                  |
| 80-84                                                                                     | 36              | 10                 | 7               | 10                 |
| 85-89                                                                                     | 15              | 1                  | 1               | 1                  |
| 90-94                                                                                     | 10              | 1                  | 1               | NA                 |
| <b>Comparison: DPP4 inhibitors vs Thiazolidinediones - Outcome: HbA1c</b>                 |                 |                    |                 |                    |
| Age group                                                                                 | Unmatched       |                    | Matched         |                    |
|                                                                                           | DPP4 inhibitors | Thiazolidinediones | DPP4 inhibitors | Thiazolidinediones |
| 15-19                                                                                     | 1               | NA                 | NA              | NA                 |
| 20-24                                                                                     | 1               | NA                 | 1               | NA                 |
| 25-29                                                                                     | 2               | 1                  | NA              | 1                  |
| 30-34                                                                                     | 5               | NA                 | 4               | NA                 |
| 35-39                                                                                     | 10              | 5                  | 5               | 5                  |
| 40-44                                                                                     | 10              | 9                  | 4               | 4                  |
| 45-49                                                                                     | 22              | 18                 | 11              | 10                 |
| 50-54                                                                                     | 33              | 30                 | 18              | 19                 |
| 55-59                                                                                     | 26              | 33                 | 18              | 13                 |
| 60-64                                                                                     | 31              | 39                 | 16              | 21                 |
| 65-69                                                                                     | 36              | 44                 | 16              | 16                 |
| 70-74                                                                                     | 37              | 19                 | 13              | 13                 |
| 75-79                                                                                     | 14              | 14                 | 4               | 8                  |
| 80-84                                                                                     | 10              | 13                 | 3               | 6                  |
| 85-89                                                                                     | 7               | 1                  | 4               | 1                  |
| 90-94                                                                                     | 1               | 1                  | NA              | NA                 |
| <b>Comparison: DPP4 inhibitors vs Thiazolidinediones - Outcome: Myocardial Infarction</b> |                 |                    |                 |                    |
| Age group                                                                                 | Unmatched       |                    | Matched         |                    |
|                                                                                           | DPP4 inhibitors | Thiazolidinediones | DPP4 inhibitors | Thiazolidinediones |
| 15-19                                                                                     | 1               | NA                 | 1               | NA                 |
| 20-24                                                                                     | 1               | NA                 | 1               | NA                 |



|       |    |    |    |    |
|-------|----|----|----|----|
| 25-29 | 2  | 1  | 2  | 1  |
| 30-34 | 5  | NA | 4  | NA |
| 35-39 | 10 | 5  | 6  | 5  |
| 40-44 | 10 | 9  | 8  | 7  |
| 45-49 | 22 | 18 | 17 | 10 |
| 50-54 | 33 | 30 | 27 | 27 |
| 55-59 | 26 | 33 | 18 | 24 |
| 60-64 | 31 | 39 | 24 | 30 |
| 65-69 | 36 | 44 | 28 | 32 |
| 70-74 | 37 | 19 | 18 | 17 |
| 75-79 | 14 | 14 | 11 | 12 |
| 80-84 | 10 | 13 | 4  | 9  |
| 85-89 | 7  | 1  | 5  | NA |
| 90-94 | 1  | 1  | 1  | 1  |

**Comparison: DPP4 inhibitors vs Thiazolidinediones - Outcome: Kidney Disorders**

| Age group | Unmatched       |                    | Matched         |                    |
|-----------|-----------------|--------------------|-----------------|--------------------|
|           | DPP4 inhibitors | Thiazolidinediones | DPP4 inhibitors | Thiazolidinediones |
| 15-19     | 1               | NA                 | 1               | NA                 |
| 20-24     | 1               | NA                 | 1               | NA                 |
| 25-29     | 2               | 1                  | 1               | 1                  |
| 30-34     | 5               | NA                 | 5               | NA                 |
| 35-39     | 10              | 5                  | 6               | 5                  |
| 40-44     | 10              | 9                  | 8               | 5                  |
| 45-49     | 22              | 18                 | 16              | 10                 |
| 50-54     | 33              | 30                 | 27              | 26                 |
| 55-59     | 26              | 33                 | 19              | 24                 |
| 60-64     | 31              | 39                 | 20              | 28                 |
| 65-69     | 36              | 44                 | 28              | 28                 |
| 70-74     | 37              | 19                 | 19              | 17                 |
| 75-79     | 14              | 14                 | 6               | 11                 |
| 80-84     | 10              | 13                 | 3               | 9                  |
| 85-89     | 7               | 1                  | 4               | NA                 |
| 90-94     | 1               | 1                  | 1               | 1                  |

**Comparison: DPP4 inhibitors vs Thiazolidinediones - Outcome: Eye Disorders**

| Age group | Unmatched       |                    | Matched         |                    |
|-----------|-----------------|--------------------|-----------------|--------------------|
|           | DPP4 inhibitors | Thiazolidinediones | DPP4 inhibitors | Thiazolidinediones |
| 15-19     | 1               | NA                 | 1               | NA                 |
| 20-24     | 1               | NA                 | 1               | NA                 |
| 25-29     | 2               | 1                  | 1               | 1                  |
| 30-34     | 5               | NA                 | 4               | NA                 |
| 35-39     | 10              | 5                  | 8               | 5                  |
| 40-44     | 10              | 9                  | 9               | 6                  |
| 45-49     | 22              | 18                 | 12              | 11                 |

|       |    |    |    |    |
|-------|----|----|----|----|
| 50-54 | 33 | 30 | 24 | 23 |
| 55-59 | 26 | 33 | 18 | 22 |
| 60-64 | 31 | 39 | 16 | 25 |
| 65-69 | 36 | 44 | 23 | 23 |
| 70-74 | 37 | 19 | 14 | 13 |
| 75-79 | 14 | 14 | 6  | 8  |
| 80-84 | 10 | 13 | 4  | 8  |
| 85-89 | 7  | 1  | 4  | NA |
| 90-94 | 1  | 1  | NA | NA |

**eTable 15.** Mean, Median and Standard Deviation of HbA<sub>1c</sub> Values for the Comparison of Sulfonylureas vs DPP4 Inhibitors Across Eight Study Sites

| <b>Truven MarketScan CCAE</b>        |                   |              |                  |             |
|--------------------------------------|-------------------|--------------|------------------|-------------|
| <b>Drug</b>                          | Before Index date |              | After Index date |             |
|                                      | Unmatched         | Matched      | Unmatched        | Matched     |
|                                      | AVG (SD)          | AVG (SD)     | AVG (SD)         | AVG (SD)    |
| Sulfonylureas                        | 9.00 (1.85)       | 9.01 (1.73)  | 7.89 (1.87)      | 7.70 (1.92) |
| DPP4 inhibitors                      | 8.67 (1.70)       | 8.92 (1.68)  | 7.58 (1.99)      | 7.61 (1.98) |
| <b>Columbia University</b>           |                   |              |                  |             |
| <b>Drug</b>                          | Before Index date |              | After Index date |             |
|                                      | Unmatched         | Matched      | Unmatched        | Matched     |
|                                      | AVG (SD)          | AVG (SD)     | AVG (SD)         | AVG (SD)    |
| Sulfonylureas                        | 10.08 (2.33)      | 10.02 (2.38) | 8.50 (1.95)      | 8.02 (1.85) |
| DPP4 inhibitors                      | 8.52 (1.27)       | 8.57 (1.39)  | 7.70 (1.77)      | 7.70 (1.79) |
| <b>IQVIA Disease Analyser France</b> |                   |              |                  |             |
| <b>Drug</b>                          | Before Index date |              | After Index date |             |
|                                      | Unmatched         | Matched      | Unmatched        | Matched     |
|                                      | AVG (SD)          | AVG (SD)     | AVG (SD)         | AVG (SD)    |
| Sulfonylureas                        | 10.19 (39.2)      | 8.44 (1.41)  | 7.51 (1.86)      | 7.87 (5.4)  |
| DPP4 inhibitors                      | 8.52 (2.3)        | 8.53 (1.28)  | 7.81 (5.08)      | 7.50 (1.68) |
| <b>Truven MarketScan MDCR</b>        |                   |              |                  |             |
| <b>Drug</b>                          | Before Index date |              | After Index date |             |
|                                      | Unmatched         | Matched      | Unmatched        | Matched     |
|                                      | AVG (SD)          | AVG (SD)     | AVG (SD)         | AVG (SD)    |
| Sulfonylureas                        | 8.46 (1.48)       | 8.40 (1.43)  | 7.42 (1.47)      | 7.29 (1.81) |
| DPP4 inhibitors                      | 8.31 (1.29)       | 8.45 (1.37)  | 7.48 (4.43)      | 7.48 (4.44) |
| <b>Mt. Sinai</b>                     |                   |              |                  |             |
| <b>Drug</b>                          | Before Index date |              | After Index date |             |
|                                      | Unmatched         | Matched      | Unmatched        | Matched     |
|                                      | AVG (SD)          | AVG (SD)     | AVG (SD)         | AVG (SD)    |
| Sulfonylureas                        | 9.20 (1.76)       | 9.03 (1.61)  | 7.89 (1.90)      | 7.71 (1.78) |
| DPP4 inhibitors                      | 8.66 (1.45)       | 8.67 (1.35)  | 7.45 (1.48)      | 7.45 (1.48) |
| <b>Optum Clinformatics Data Mart</b> |                   |              |                  |             |
| <b>Drug</b>                          | Before Index date |              | After Index date |             |
|                                      | Unmatched         | Matched      | Unmatched        | Matched     |
|                                      | AVG (SD)          | AVG (SD)     | AVG (SD)         | AVG (SD)    |
| Sulfonylureas                        | 8.77 (4.88)       | 8.94 (3.82)  | 7.89 (5.51)      | 7.87 (6.18) |
| DPP4 inhibitors                      | 8.48 (3.25)       | 8.85 (3.26)  | 7.93 (5.9)       | 7.93 (5.84) |
| <b>Ajou University, South Korea</b>  |                   |              |                  |             |
| <b>Drug</b>                          | Before Index date |              | After Index date |             |
|                                      | Unmatched         | Matched      | Unmatched        | Matched     |

|                            |                   |             |                  |             |
|----------------------------|-------------------|-------------|------------------|-------------|
|                            | AVG (SD)          | AVG (SD)    | AVG (SD)         | AVG (SD)    |
| Sulfonylureas              | 7.63 (1.28)       | 8.25 (1.55) | 7.68 (1.47)      | 7.56 (1.37) |
| DPP4 inhibitors            | 7.89 (1.57)       | 7.99 (1.37) | 7.47 (1.19)      | 7.45 (1.18) |
| <b>Stanford University</b> |                   |             |                  |             |
| <b>Drug</b>                | Before Index date |             | After Index date |             |
|                            | Unmatched         | Matched     | Unmatched        | Matched     |
|                            | AVG (SD)          | AVG (SD)    | AVG (SD)         | AVG (SD)    |
| Sulfonylureas              | 9.22 (1.71)       | 8.74 (1.59) | 7.95 (1.67)      | 7.89 (1.52) |
| DPP4 inhibitors            | 8.85 (1.52)       | 8.69 (1.76) | 7.50 (1.34)      | 7.50 (1.33) |

**eTable 16.** Mean, Median and Standard Deviation of HbA<sub>1c</sub> Values for the Comparison of Sulfonylureas vs Thiazolidinediones Across Eight Study Sites

| <b>Truven MarketScan CCAE</b>        |                   |              |                  |              |
|--------------------------------------|-------------------|--------------|------------------|--------------|
| <b>Drug</b>                          | Before Index date |              | After Index date |              |
|                                      | Unmatched         | Matched      | Unmatched        | Matched      |
|                                      | AVG (SD)          | AVG (SD)     | AVG (SD)         | AVG (SD)     |
| Sulfonylureas                        | 8.96 (1.84)       | 9.09 (1.73)  | 7.85 (1.91)      | 7.82 (1.86)  |
| Thiazolidinediones                   | 8.97 (1.74)       | 9.13 (1.73)  | 7.76 (1.82)      | 7.76 (1.83)  |
| <b>Columbia University</b>           |                   |              |                  |              |
| <b>Drug</b>                          | Before Index date |              | After Index date |              |
|                                      | Unmatched         | Matched      | Unmatched        | Matched      |
|                                      | AVG (SD)          | AVG (SD)     | AVG (SD)         | AVG (SD)     |
| Sulfonylureas                        | 10.00 (2.3)       | 10.02 (2.51) | 8.45 (1.92)      | 8.50 (1.96)  |
| Thiazolidinediones                   | 9.94 (2.37)       | 9.23 (1.62)  | 8.36 (2.05)      | 8.36 (2.05)  |
| <b>IQVIA Disease Analyser France</b> |                   |              |                  |              |
| <b>Drug</b>                          | Before Index date |              | After Index date |              |
|                                      | Unmatched         | Matched      | Unmatched        | Matched      |
|                                      | AVG (SD)          | AVG (SD)     | AVG (SD)         | AVG (SD)     |
| Sulfonylureas                        | 8.82 (3.14)       | 8.65 (1.44)  | 7.71 (11.49)     | 7.62 (2.33)  |
| Thiazolidinediones                   | 10.19 (38.97)     | 8.77 (1.28)  | 7.52 (2.6)       | 7.77 (13.31) |
| <b>Truven MarketScan MDCR</b>        |                   |              |                  |              |
| <b>Drug</b>                          | Before Index date |              | After Index date |              |
|                                      | Unmatched         | Matched      | Unmatched        | Matched      |
|                                      | AVG (SD)          | AVG (SD)     | AVG (SD)         | AVG (SD)     |
| Sulfonylureas                        | 8.48 (1.47)       | 8.61 (1.66)  | 7.40 (1.48)      | 7.33 (1.32)  |
| Thiazolidinediones                   | 8.54 (1.29)       | 8.55 (1.3)   | 7.53 (3.81)      | 7.54 (3.84)  |
| <b>Mt. Sinai</b>                     |                   |              |                  |              |
| <b>Drug</b>                          | Before Index date |              | After Index date |              |
|                                      | Unmatched         | Matched      | Unmatched        | Matched      |
|                                      | AVG (SD)          | AVG (SD)     | AVG (SD)         | AVG (SD)     |
| Sulfonylureas                        | 9.10 (1.69)       | 9.09 (1.68)  | 7.80 (1.81)      | 7.80 (1.69)  |
| Thiazolidinediones                   | 8.97 (1.64)       | 8.90 (1.58)  | 7.63 (1.82)      | 7.63 (1.83)  |
| <b>Optum Clinformatics Data Mart</b> |                   |              |                  |              |
| <b>Drug</b>                          | Before Index date |              | After Index date |              |
|                                      | Unmatched         | Matched      | Unmatched        | Matched      |
|                                      | AVG (SD)          | AVG (SD)     | AVG (SD)         | AVG (SD)     |
| Sulfonylureas                        | 8.83 (17.63)      | 9.12 (3.22)  | 7.90 (5.58)      | 7.84 (4.21)  |
| Thiazolidinediones                   | 8.83 (3.34)       | 9.09 (4.00)  | 7.72 (4.00)      | 7.73 (4.03)  |
| <b>Ajou University, South Korea</b>  |                   |              |                  |              |
| <b>Drug</b>                          | Before Index date |              | After Index date |              |
|                                      | Unmatched         | Matched      | Unmatched        | Matched      |

|                            |                   |             |                  |             |
|----------------------------|-------------------|-------------|------------------|-------------|
|                            | AVG (SD)          | AVG (SD)    | AVG (SD)         | AVG (SD)    |
| Sulfonylureas              | 7.95 (1.63)       | 8.27 (1.65) | 7.71 (1.47)      | 7.69 (1.41) |
| Thiazolidinediones         | 7.97 (1.46)       | 8.10 (1.27) | 7.87 (1.49)      | 7.79 (1.45) |
| <b>Stanford University</b> |                   |             |                  |             |
| <b>Drug</b>                | Before Index date |             | After Index date |             |
|                            | Unmatched         | Matched     | Unmatched        | Matched     |
|                            | AVG (SD)          | AVG (SD)    | AVG (SD)         | AVG (SD)    |
| Sulfonylureas              | 9.07 (1.67)       | 9.73 (2.27) | 7.96 (1.63)      | 8.00 (1.49) |
| Thiazolidinediones         | 9.03 (2.08)       | 9.25 (2.29) | 7.66 (1.72)      | 7.66 (1.72) |

**eTable 17.** Mean, Median and Standard Deviation of HbA<sub>1c</sub> Values for the Comparison of DPP4 Inhibitors vs Thiazolidinediones Across Eight Study Sites

| <b>Truven MarketScan CCAE</b>        |                   |             |                  |              |
|--------------------------------------|-------------------|-------------|------------------|--------------|
| <b>Drug</b>                          | Before Index date |             | After Index date |              |
|                                      | Unmatched         | Matched     | Unmatched        | Matched      |
|                                      | AVG (SD)          | AVG (SD)    | AVG (SD)         | AVG (SD)     |
| DPP4 inhibitors                      | 8.71 (1.7)        | 9.03 (1.69) | 7.64 (2.05)      | 7.72 (2.01)  |
| Thiazolidinediones                   | 9.04 (1.75)       | 9.18 (1.76) | 7.86 (1.83)      | 7.73 (1.91)  |
| <b>Columbia University</b>           |                   |             |                  |              |
| <b>Drug</b>                          | Before Index date |             | After Index date |              |
|                                      | Unmatched         | Matched     | Unmatched        | Matched      |
|                                      | AVG (SD)          | AVG (SD)    | AVG (SD)         | AVG (SD)     |
| DPP4 inhibitors                      | 8.60 (1.36)       | 8.42 (1.35) | 8.02 (1.77)      | 8.00 (1.77)  |
| Thiazolidinediones                   | 9.94 (2.35)       | 9.08 (1.65) | 8.61 (2.07)      | 8.55 (2.13)  |
| <b>IQVIA Disease Analyser France</b> |                   |             |                  |              |
| <b>Drug</b>                          | Before Index date |             | After Index date |              |
|                                      | Unmatched         | Matched     | Unmatched        | Matched      |
|                                      | AVG (SD)          | AVG (SD)    | AVG (SD)         | AVG (SD)     |
| DPP4 inhibitors                      | 8.51 (2.24)       | 8.61 (1.60) | 7.81 (5.24)      | 7.85 (5.18)  |
| Thiazolidinediones                   | 8.78 (2.9)        | 8.69 (1.39) | 7.77 (11.7)      | 8.00 (16.00) |
| <b>Truven MarketScan MDCR</b>        |                   |             |                  |              |
| <b>Drug</b>                          | Before Index date |             | After Index date |              |
|                                      | Unmatched         | Matched     | Unmatched        | Matched      |
|                                      | AVG (SD)          | AVG (SD)    | AVG (SD)         | AVG (SD)     |
| DPP4 inhibitors                      | 8.36 (1.32)       | 8.57 (1.35) | 7.45 (1.53)      | 7.48 (1.45)  |
| Thiazolidinediones                   | 8.44 (1.25)       | 8.60 (1.40) | 7.51 (1.36)      | 7.39 (1.37)  |
| <b>Mt. Sinai</b>                     |                   |             |                  |              |
| <b>Drug</b>                          | Before Index date |             | After Index date |              |
|                                      | Unmatched         | Matched     | Unmatched        | Matched      |
|                                      | AVG (SD)          | AVG (SD)    | AVG (SD)         | AVG (SD)     |
| DPP4 inhibitors                      | 8.59 (1.33)       | 8.93 (1.63) | 7.60 (1.60)      | 7.61 (1.69)  |
| Thiazolidinediones                   | 9.22 (1.70)       | 9.10 (1.66) | 8.02 (2.01)      | 7.82 (1.87)  |
| <b>Optum Clinformatics Data Mart</b> |                   |             |                  |              |
| <b>Drug</b>                          | Before Index date |             | After Index date |              |
|                                      | Unmatched         | Matched     | Unmatched        | Matched      |
|                                      | AVG (SD)          | AVG (SD)    | AVG (SD)         | AVG (SD)     |
| DPP4 inhibitors                      | 8.65 (19.34)      | 9.06 (3.45) | 7.96 (5.59)      | 7.98 (4.76)  |
| Thiazolidinediones                   | 8.91 (3.56)       | 9.16 (4.88) | 7.77 (3.65)      | 7.81 (4.40)  |
| <b>Ajou University, South Korea</b>  |                   |             |                  |              |
| <b>Drug</b>                          | Before Index date |             | After Index date |              |
|                                      | Unmatched         | Matched     | Unmatched        | Matched      |

|                            |                   |             |                  |             |
|----------------------------|-------------------|-------------|------------------|-------------|
|                            | AVG (SD)          | AVG (SD)    | AVG (SD)         | AVG (SD)    |
| DPP4 inhibitors            | 7.69 (1.33)       | 7.93 (1.33) | 7.56 (1.30)      | 7.59 (1.27) |
| Thiazolidinediones         | 8.07 (1.57)       | 8.24 (1.47) | 7.86 (1.49)      | 7.83 (1.46) |
| <b>Stanford University</b> |                   |             |                  |             |
| <b>Drug</b>                | Before Index date |             | After Index date |             |
|                            | Unmatched         | Matched     | Unmatched        | Matched     |
|                            | AVG (SD)          | AVG (SD)    | AVG (SD)         | AVG (SD)    |
| DPP4 inhibitors            | 8.69 (1.40)       | 8.98 (1.80) | 7.75 (1.31)      | 7.73 (1.29) |
| Thiazolidinediones         | 8.91 (1.67)       | 9.05 (1.74) | 7.85 (1.73)      | 7.90 (1.73) |



**eTable 18.** Number of Patients, Hazard Ratio, Confidence Intervals (CI), *P* Values and Calibrated *P* Values for Each Drug Comparison and Each Outcome Based on Analysis Across All Eight Study Sites.

| <b>Comparison: Sulfonylureas vs DPP4 inhibitors - Outcome: HbA1c</b>                 |          |                     |                           |                           |                |                           |
|--------------------------------------------------------------------------------------|----------|---------------------|---------------------------|---------------------------|----------------|---------------------------|
| <b>Study Site</b>                                                                    | <b>N</b> | <b>Hazard Ratio</b> | <b>95% CI Lower bound</b> | <b>95% CI Upper bound</b> | <b>P-Value</b> | <b>Calibrated P-Value</b> |
| <b>Truven Marketscan CCAE</b>                                                        | 10011    | 1.04                | 0.98                      | 1.09                      | 0.20           | 0.84                      |
| <b>Columbia University</b>                                                           | 205      | 0.62                | 0.41                      | 0.91                      | 0.02           | 0.01                      |
| <b>IQVIA Disease Analyser France</b>                                                 | 774      | 0.71                | 0.58                      | 0.86                      | 0.00           | 0.00                      |
| <b>Truven Marketscan MDCR</b>                                                        | 1661     | 1.24                | 1.09                      | 1.40                      | 0.00           | 0.04                      |
| <b>Mt Sinai</b>                                                                      | 880      | 0.87                | 0.73                      | 1.04                      | 0.12           | 0.01                      |
| <b>Optum Clinformatics Data Mart</b>                                                 | 24777    | 1.11                | 1.08                      | 1.15                      | 0.00           | 0.81                      |
| <b>Ajou University</b>                                                               | 576      | 1.38                | 0.95                      | 2.02                      | 0.09           | 0.00                      |
| <b>Stanford University</b>                                                           | 98       | 0.93                | 0.55                      | 1.57                      | 0.79           | 0.52                      |
| <b>Comparison: Sulfonylureas vs DPP4 inhibitors - Outcome: Myocardial Infarction</b> |          |                     |                           |                           |                |                           |
| <b>Study Site</b>                                                                    | <b>N</b> | <b>Hazard Ratio</b> | <b>95% CI Lower bound</b> | <b>95% CI Upper bound</b> | <b>P-Value</b> | <b>Calibrated P-Value</b> |
| <b>Truven Marketscan CCAE</b>                                                        | 12839    | 1.17                | 0.91                      | 1.52                      | 0.22           | 0.37                      |
| <b>Columbia University</b>                                                           | 304      | 2.14                | 0.90                      | 5.61                      | 0.10           | 0.18                      |
| <b>IQVIA Disease Analyser France</b>                                                 | 1081     | 1.00                | 0.19                      | 5.40                      | 1.00           | 0.82                      |
| <b>Truven Marketscan MDCR</b>                                                        | 2008     | 1.40                | 0.95                      | 2.08                      | 0.10           | 0.19                      |
| <b>Mt Sinai</b>                                                                      | 1041     | 0.65                | 0.35                      | 1.20                      | 0.18           | 0.08                      |
| <b>Optum Clinformatics Data Mart</b>                                                 | 34303    | 1.10                | 0.99                      | 1.23                      | 0.09           | 0.90                      |
| <b>Ajou University</b>                                                               | 599      | 3.00                | 0.38                      | 60.62                     | 0.39           | 0.05                      |
| <b>Stanford University</b>                                                           | 167      | 1.00                | 0.12                      | 8.33                      | 1.00           | 0.81                      |
| <b>Comparison: Sulfonylureas vs DPP4 inhibitors - Outcome: Kidney Disorders</b>      |          |                     |                           |                           |                |                           |

| Study Site                                                                   | N     | Hazard Ratio | 95% CI Lower bound | 95% CI Upper bound | P-Value | Calibrated P-Value |
|------------------------------------------------------------------------------|-------|--------------|--------------------|--------------------|---------|--------------------|
| Truven Marketscan CCAE                                                       | 11558 | 1.08         | 0.99               | 1.17               | 0.09    | 0.56               |
| Columbia University                                                          | 281   | 1.25         | 0.79               | 2.00               | 0.35    | 0.60               |
| IQVIA Disease Analyser France                                                | 1056  | 0.75         | 0.40               | 1.38               | 0.36    | 0.13               |
| Truven Marketscan MDCR                                                       | 1554  | 1.04         | 0.89               | 1.21               | 0.66    | 0.73               |
| Mt Sinai                                                                     | 1013  | 0.76         | 0.55               | 1.03               | 0.07    | 0.01               |
| Optum Clinformatics Data Mart                                                | 29060 | 1.12         | 1.07               | 1.17               | 0.00    | 0.78               |
| Ajou University                                                              | 594   | 2.67         | 1.10               | 7.43               | 0.04    | 0.00               |
| Stanford University                                                          | 147   | 2.25         | 1.17               | 4.61               | 0.02    | 0.00               |
| <b>Comparison: Sulfonylureas vs DPP4 inhibitors - Outcome: Eye Disorders</b> |       |              |                    |                    |         |                    |
| Study Site                                                                   | N     | Hazard Ratio | 95% CI Lower bound | 95% CI Upper bound | P-Value | Calibrated P-Value |
| Truven Marketscan CCAE                                                       | 10925 | 1.11         | 1.03               | 1.20               | 0.01    | 0.26               |
| Columbia University                                                          | 269   | 1.31         | 0.64               | 2.75               | 0.47    | 0.67               |
| IQVIA Disease Analyser France                                                | 1083  | 3.00         | 0.69               | 20.47              | 0.20    | 0.30               |
| Truven Marketscan MDCR                                                       | 1227  | 1.10         | 0.94               | 1.29               | 0.24    | 0.72               |
| Mt Sinai                                                                     | 1006  | 1.18         | 0.77               | 1.81               | 0.45    | 0.78               |
| Optum Clinformatics Data Mart                                                | 26460 | 1.16         | 1.11               | 1.21               | 0.00    | 0.46               |
| Ajou University                                                              | 599   | 3.50         | 1.26               | 12.35              | 0.03    | 0.00               |
| Stanford University                                                          | 135   | 1.75         | 0.75               | 4.38               | 0.21    | 0.09               |
| <b>Comparison: Sulfonylureas vs Thiazolidinediones - Outcome: HbA1c</b>      |       |              |                    |                    |         |                    |
| Study Site                                                                   | N     | Hazard Ratio | 95% CI Lower bound | 95% CI Upper bound | P-Value | Calibrated P-Value |

|                                                                                         |          |                     |                           |                           |                |                           |
|-----------------------------------------------------------------------------------------|----------|---------------------|---------------------------|---------------------------|----------------|---------------------------|
| <b>Truven Marketscan CCAE</b>                                                           | 9714     | 1.10                | 1.04                      | 1.17                      | 0.00           | 0.49                      |
| <b>Columbia University</b>                                                              | 269      | 1.13                | 0.80                      | 1.61                      | 0.48           | 0.66                      |
| <b>IQVIA Disease Analyser France</b>                                                    | 499      | 1.15                | 0.91                      | 1.45                      | 0.25           | 0.44                      |
| <b>Truven Marketscan MDCR</b>                                                           | 1440     | 1.25                | 1.10                      | 1.43                      | 0.00           | 0.13                      |
| <b>Mt Sinai</b>                                                                         | 417      | 0.74                | 0.55                      | 0.98                      | 0.04           | 0.34                      |
| <b>Optum Clinformatics Data Mart</b>                                                    | 22953    | 0.99                | 0.95                      | 1.02                      | 0.51           | 0.11                      |
| <b>Ajou University</b>                                                                  | 175      | 1.00                | 0.47                      | 2.12                      | 1.00           | NA                        |
| <b>Stanford University</b>                                                              | 78       | 0.85                | 0.48                      | 1.48                      | 0.57           | 0.62                      |
| <b>Comparison: Sulfonylureas vs Thiazolidinediones - Outcome: Myocardial Infarction</b> |          |                     |                           |                           |                |                           |
| <b>Study Site</b>                                                                       | <b>N</b> | <b>Hazard Ratio</b> | <b>95% CI Lower bound</b> | <b>95% CI Upper bound</b> | <b>P-Value</b> | <b>Calibrated P-Value</b> |
| <b>Truven Marketscan CCAE</b>                                                           | 10887    | 0.96                | 0.74                      | 1.26                      | 0.79           | 0.54                      |
| <b>Columbia University</b>                                                              | 400      | 2.14                | 0.90                      | 5.61                      | 0.10           | 0.14                      |
| <b>IQVIA Disease Analyser France</b>                                                    | 608      | 1.50                | 0.43                      | 5.87                      | 0.54           | 0.57                      |
| <b>Truven Marketscan MDCR</b>                                                           | 1578     | 0.87                | 0.60                      | 1.25                      | 0.46           | 0.35                      |
| <b>Mt Sinai</b>                                                                         | 517      | 0.73                | 0.28                      | 1.80                      | 0.50           | 0.67                      |
| <b>Optum Clinformatics Data Mart</b>                                                    | 28549    | 1.14                | 1.01                      | 1.29                      | 0.03           | 0.64                      |
| <b>Ajou University</b>                                                                  | 181      | NA                  | NA                        | NA                        | NA             | NA                        |
| <b>Stanford University</b>                                                              | 134      | 0.00                | NA                        | 1.61                      | NA             | NA                        |
| <b>Comparison: Sulfonylureas vs Thiazolidinediones - Outcome: Kidney Disorders</b>      |          |                     |                           |                           |                |                           |
| <b>Study Site</b>                                                                       | <b>N</b> | <b>Hazard Ratio</b> | <b>95% CI Lower bound</b> | <b>95% CI Upper bound</b> | <b>P-Value</b> | <b>Calibrated P-Value</b> |
| <b>Truven Marketscan CCAE</b>                                                           | 9980     | 0.95                | 0.87                      | 1.03                      | 0.22           | 0.13                      |
| <b>Columbia University</b>                                                              | 372      | 0.96                | 0.64                      | 1.43                      | 0.84           | 0.65                      |
| <b>IQVIA Disease Analyser France</b>                                                    | 594      | 1.43                | 0.73                      | 2.89                      | 0.31           | 0.36                      |
| <b>Truven Marketscan MDCR</b>                                                           | 1272     | 0.94                | 0.80                      | 1.10                      | 0.45           | 0.34                      |

|                                                                                 |          |                     |                           |                           |                |                           |
|---------------------------------------------------------------------------------|----------|---------------------|---------------------------|---------------------------|----------------|---------------------------|
| <b>Mt Sinai</b>                                                                 | 501      | 0.85                | 0.56                      | 1.30                      | 0.46           | 0.73                      |
| <b>Optum Clinformatics Data Mart</b>                                            | 25775    | 1.09                | 1.04                      | 1.15                      | 0.00           | 0.89                      |
| <b>Ajou University</b>                                                          | 180      | 2.50                | 0.54                      | 17.45                     | 0.30           | NA                        |
| <b>Stanford University</b>                                                      | 126      | 2.00                | 0.99                      | 4.28                      | 0.06           | 0.04                      |
| <b>Comparison: Sulfonylureas vs Thiazolidinediones - Outcome: Eye Disorders</b> |          |                     |                           |                           |                |                           |
| <b>Study Site</b>                                                               | <b>N</b> | <b>Hazard Ratio</b> | <b>95% CI Lower bound</b> | <b>95% CI Upper bound</b> | <b>P-Value</b> | <b>Calibrated P-Value</b> |
| <b>Truven Marketscan CCAE</b>                                                   | 9636     | 0.98                | 0.90                      | 1.06                      | 0.55           | 0.26                      |
| <b>Columbia University</b>                                                      | 326      | 1.19                | 0.74                      | 1.91                      | 0.48           | 0.64                      |
| <b>IQVIA Disease Analyser France</b>                                            | 604      | 1.33                | 0.29                      | 6.77                      | 0.72           | 0.74                      |
| <b>Truven Marketscan MDCR</b>                                                   | 1063     | 1.10                | 0.94                      | 1.28                      | 0.24           | 0.73                      |
| <b>Mt Sinai</b>                                                                 | 472      | 1.36                | 0.79                      | 2.39                      | 0.27           | 0.19                      |
| <b>Optum Clinformatics Data Mart</b>                                            | 23773    | 1.07                | 1.02                      | 1.11                      | 0.01           | 0.66                      |
| <b>Ajou University</b>                                                          | 179      | 3.50                | 0.85                      | 23.49                     | 0.14           | NA                        |
| <b>Stanford University</b>                                                      | 121      | 1.08                | 0.50                      | 2.32                      | 0.85           | 0.53                      |
| <b>Comparison: DPP4 inhibitors vs Thiazolidinediones - Outcome: HbA1c</b>       |          |                     |                           |                           |                |                           |
| <b>Study Site</b>                                                               | <b>N</b> | <b>Hazard Ratio</b> | <b>95% CI Lower bound</b> | <b>95% CI Upper bound</b> | <b>P-Value</b> | <b>Calibrated P-Value</b> |
| <b>Truven Marketscan CCAE</b>                                                   | 6871     | 1.05                | 0.98                      | 1.13                      | 0.14           | 0.87                      |
| <b>Columbia University</b>                                                      | 175      | 1.11                | 0.66                      | 1.88                      | 0.69           | 0.35                      |
| <b>IQVIA Disease Analyser France</b>                                            | 389      | 1.76                | 1.34                      | 2.33                      | 0.00           | 0.00                      |
| <b>Truven Marketscan MDCR</b>                                                   | 942      | 1.12                | 0.94                      | 1.35                      | 0.20           | 0.60                      |
| <b>Mt Sinai</b>                                                                 | 475      | 1.00                | 0.76                      | 1.32                      | 1.00           | 0.58                      |
| <b>Optum Clinformatics Data Mart</b>                                            | 16763    | 0.97                | 0.93                      | 1.01                      | 0.17           | 0.81                      |
| <b>Ajou University</b>                                                          | 205      | 0.40                | 0.14                      | 0.98                      | 0.06           | NA                        |
| <b>Stanford University</b>                                                      | 117      | 0.85                | 0.48                      | 1.49                      | 0.57           | 0.42                      |

| <b>Comparison: DPP4 inhibitors vs Thiazolidinediones - Outcome: Myocardial Infarction</b> |          |                     |                           |                           |                |                           |
|-------------------------------------------------------------------------------------------|----------|---------------------|---------------------------|---------------------------|----------------|---------------------------|
| <b>Study Site</b>                                                                         | <b>N</b> | <b>Hazard Ratio</b> | <b>95% CI Lower bound</b> | <b>95% CI Upper bound</b> | <b>P-Value</b> | <b>Calibrated P-Value</b> |
| <b>Truven Marketscan CCAE</b>                                                             | 8197     | 1.03                | 0.74                      | 1.44                      | 0.87           | 0.90                      |
| <b>Columbia University</b>                                                                | 237      | 1.00                | 0.19                      | 5.40                      | 1.00           | 0.65                      |
| <b>IQVIA Disease Analyser France</b>                                                      | 509      | 0.75                | 0.15                      | 3.40                      | 0.72           | 0.85                      |
| <b>Truven Marketscan MDCR</b>                                                             | 1072     | 1.28                | 0.69                      | 2.40                      | 0.44           | 0.56                      |
| <b>Mt Sinai</b>                                                                           | 554      | 0.88                | 0.31                      | 2.44                      | 0.80           | 0.70                      |
| <b>Optum Clinformatics Data Mart</b>                                                      | 21505    | 1.11                | 0.96                      | 1.30                      | 0.17           | 0.36                      |
| <b>Ajou University</b>                                                                    | 211      | NA                  | NA                        | NA                        | NA             | NA                        |
| <b>Stanford University</b>                                                                | 175      | NA                  | NA                        | NA                        | NA             | NA                        |
| <b>Comparison: DPP4 inhibitors vs Thiazolidinediones - Outcome: Kidney Disorders</b>      |          |                     |                           |                           |                |                           |
| <b>Study Site</b>                                                                         | <b>N</b> | <b>Hazard Ratio</b> | <b>95% CI Lower bound</b> | <b>95% CI Upper bound</b> | <b>P-Value</b> | <b>Calibrated P-Value</b> |
| <b>Truven Marketscan CCAE</b>                                                             | 7557     | 1.04                | 0.93                      | 1.17                      | 0.45           | 0.87                      |
| <b>Columbia University</b>                                                                | 221      | 1.14                | 0.64                      | 2.07                      | 0.66           | 0.43                      |
| <b>IQVIA Disease Analyser France</b>                                                      | 499      | 1.50                | 0.62                      | 3.83                      | 0.38           | 0.27                      |
| <b>Truven Marketscan MDCR</b>                                                             | 888      | 1.04                | 0.84                      | 1.29                      | 0.70           | 0.82                      |
| <b>Mt Sinai</b>                                                                           | 538      | 1.50                | 0.93                      | 2.44                      | 0.10           | 0.26                      |
| <b>Optum Clinformatics Data Mart</b>                                                      | 18927    | 1.01                | 0.95                      | 1.07                      | 0.87           | 0.87                      |
| <b>Ajou University</b>                                                                    | 208      | 0.50                | 0.07                      | 2.56                      | 0.45           | NA                        |
| <b>Stanford University</b>                                                                | 165      | 0.64                | 0.23                      | 1.62                      | 0.36           | 0.29                      |
| <b>Comparison: DPP4 inhibitors vs Thiazolidinediones - Outcome: Eye Disorders</b>         |          |                     |                           |                           |                |                           |
| <b>Study Site</b>                                                                         | <b>N</b> | <b>Hazard Ratio</b> | <b>95% CI Lower bound</b> | <b>95% CI Upper bound</b> | <b>P-Value</b> | <b>Calibrated P-Value</b> |

|                                      |       |      |      |       |      |      |
|--------------------------------------|-------|------|------|-------|------|------|
| <b>Truven Marketscan CCAE</b>        | 7220  | 1.03 | 0.93 | 1.14  | 0.59 | 0.80 |
| <b>Columbia University</b>           | 204   | 0.67 | 0.22 | 1.85  | 0.45 | 0.16 |
| <b>IQVIA Disease Analyser France</b> | 508   | 1.50 | 0.25 | 11.39 | 0.68 | 0.59 |
| <b>Truven Marketscan MDCR</b>        | 732   | 0.95 | 0.76 | 1.18  | 0.62 | 0.46 |
| <b>Mt Sinai</b>                      | 529   | 1.23 | 0.59 | 2.60  | 0.58 | 0.74 |
| <b>Optum Clinformatics Data Mart</b> | 17470 | 0.95 | 0.90 | 1.00  | 0.06 | 0.67 |
| <b>Ajou University</b>               | 210   | 1.00 | 0.19 | 5.40  | 1.00 | NA   |
| <b>Stanford University</b>           | 145   | 0.38 | 0.08 | 1.30  | 0.16 | 0.14 |

**eFigure 1. Cohort Construction**

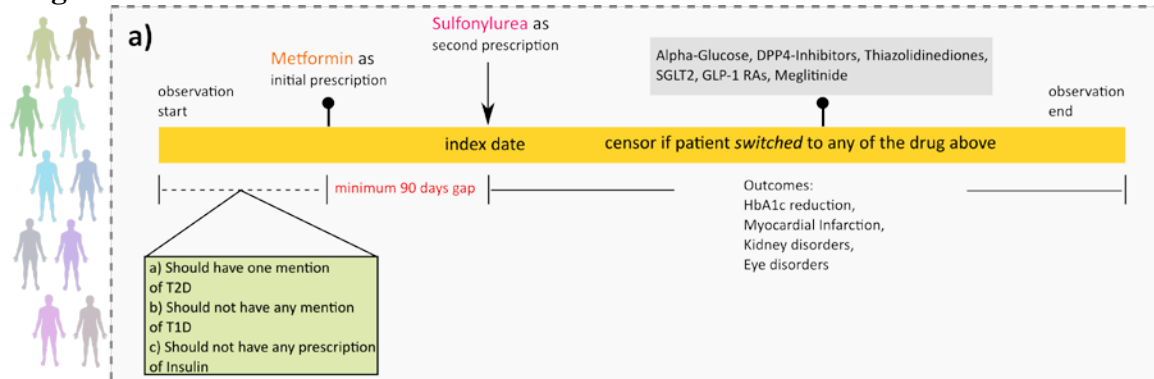

Steps involved in cohort construction and censoring for the time-to-event analysis, using the Sulfonylureas cohort as an example.

A patient is selected based on following conditions.

- Prescription of Second-line drug (Sulfonylureas, DPP4 Inhibitors, or Thiazolidinediones). The date of prescription is considered as the index date relative to which patient is filtered.
- Patient should have a prescription of Metformin at least 90 days prior to index date.
- Patient should have a mention of T2D related codes before index date and no mention of type 1 diabetes codes before the index date. The ICD9-CM or ICD10-CM codes were mapped to their corresponding SNOMED codes to identify patients in the OMOP-CDM schema.
- No prescription of any other T2D related drug among alpha-glucose inhibitors, DPP4 inhibitors, thiazolidinediones, SGLT2 inhibitors, glucagones and meglitinide before the index date including Insulin.
- Reported HbA<sub>1c</sub> value after the prescription of sulfonylurea. Can have reported incidence of myocardial infarction, kidney disorders and eye disorders.

Patient is right censored depending on the outcome of interest under investigation. The patient is right censored if prescription of any drug among alpha-glucose inhibitors, DPP4 inhibitors, thiazolidinediones, SGLT2 inhibitors, glucagon-like peptide receptor agonists, or meglitinide is observed after the prescription of sulfonylurea. In case of absence of event the complete length of patient's medical record is used as the observational window.

eFigure 1 represents the steps involved in the cohort construction for Sulfonylureas cohort, as an example.

eFigure 2. Comparative Effectiveness of Sulfonylureas vs Thiazolidinediones

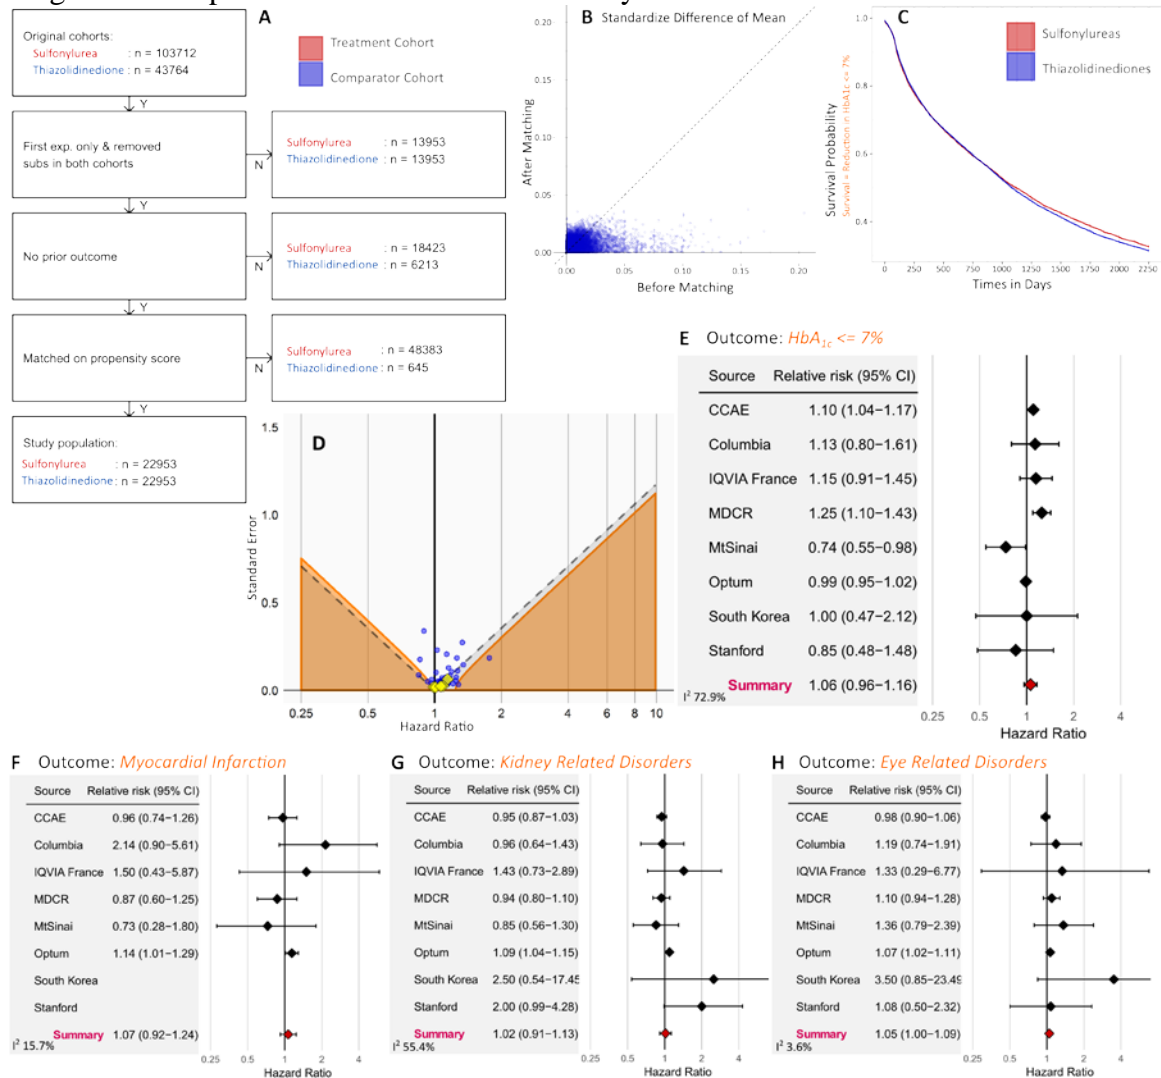

A) Flowchart of matched cohort construction based on the data from Optum, B) covariate balance as standardized mean difference before and after matching based on the data from Optum C) Kaplan-Meier curves for the reduction of HbA<sub>1c</sub> ≤ 7% based on the data from Optum D) Empirical calibration plots based on the data from Optum where estimates below the dashed line in gray area have p < 0.05 using traditional p-value calculation. Estimates in the orange area have p < 0.05 using calibrated p-value calculation. Yellow dots represents outcome and blue dots represent negative controls E) Hazard ratio (HR) of observing a reduction in HbA<sub>1c</sub> ≤ 7% after treatment with either sulfonylurea or thiazolidinediones across multiple healthcare systems and consensus effect based on meta-analysis. An HR > 1 mean sulfonylureas are associated with higher hazard of reducing HbA<sub>1c</sub> compared to thiazolidinediones. Hazard ratio of observing an event related to F) myocardial infarction G) kidney disorder and H) eye disorder across multiple healthcare systems along with meta-analysis. An HR < 1 means sulfonylureas are associated with a lower hazard of the outcome related to myocardial infarction, kidney and eye disorders. I<sup>2</sup> values for each meta-analysis in E-H are shown in the bottom left of each outcome box.



eFigure 3. Comparative Effectiveness of DPP4 Inhibitors vs Thiazolidinediones

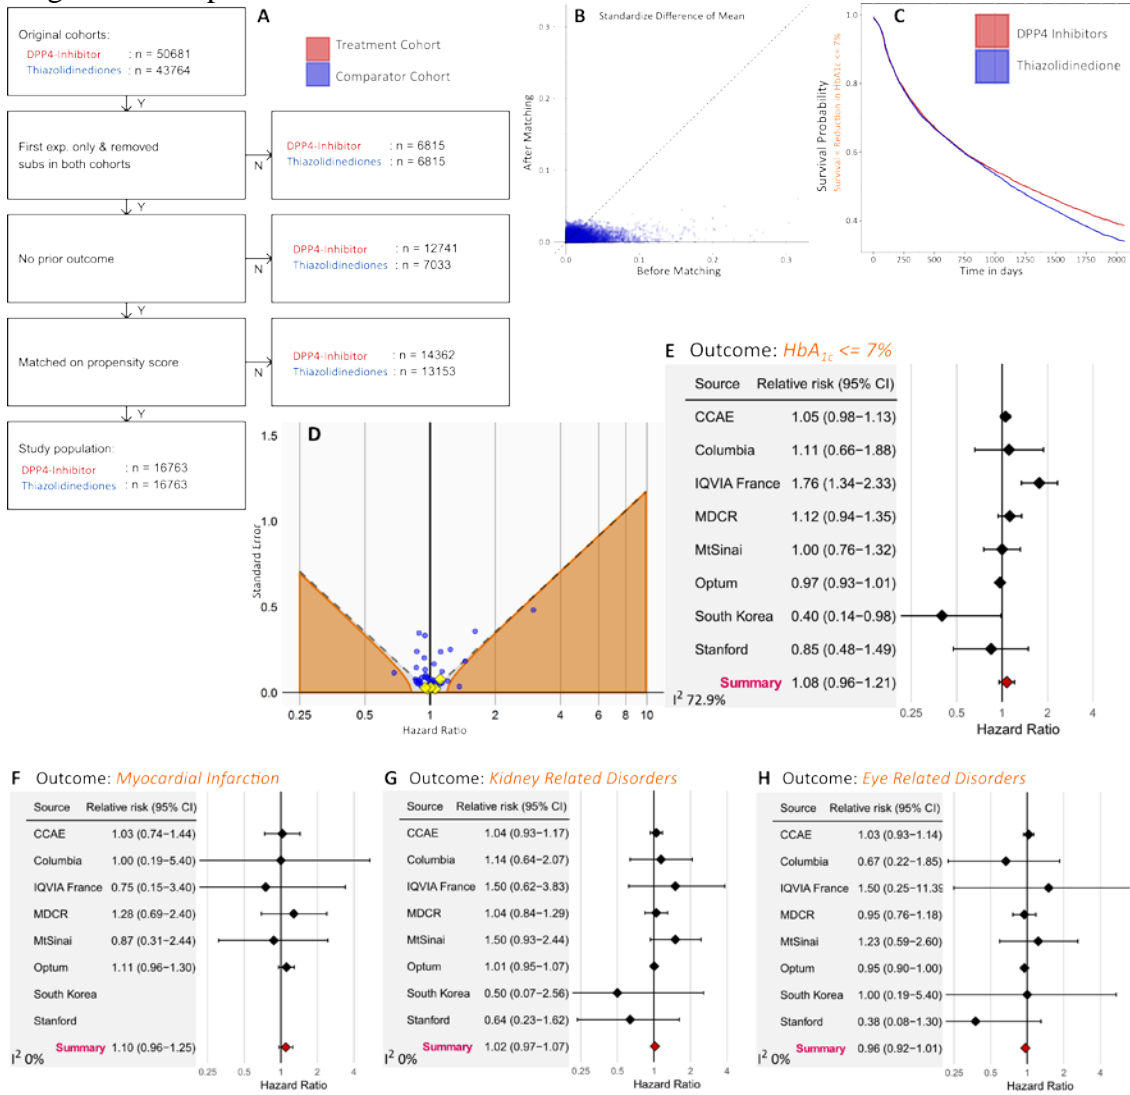

A) Flowchart of matched cohort construction from the data based on Optum, B) covariate balance as standardized mean difference before and after matching from the data based on Optum C) Kaplan-Meier curves for the reduction of HbA<sub>1c</sub> ≤ 7% from the data based on Optum D) Empirical calibration plots from the data based on Optum where estimates below the dashed line in gray area have p < 0.05 using traditional p-value calculation. Estimates in the orange area have p < 0.05 using calibrated p-value calculation. Yellow dots represents outcome and blue dots represent negative controls E) Hazard ratio (HR) of observing a reduction in HbA<sub>1c</sub> ≤ 7% after treatment with either DPP4 inhibitors or thiazolidinediones across multiple healthcare systems and consensus effect based on meta-analysis. An HR > 1 means DPP4 inhibitor are associated with higher hazard of reducing HbA<sub>1c</sub> compared to thiazolidinediones. Hazard ratio of observing an event related to F) myocardial infarction G) kidney disorder and H) eye disorder across multiple healthcare systems along with meta-analysis. An HR < 1 means DPP4 inhibitors are associated with a lower hazard of the outcome related to myocardial infarction, kidney and eye disorders. I<sup>2</sup> values for each meta-analysis in E-H are shown in the bottom left of each outcome box.
